# Supplementary material for: Cost-effectiveness of initial stress cardiovascular MR, stress SPECT or stress echocardiography as a gate-keeper test, compared with upfront invasive coronary angiography in the investigation and management of patients with stable chest pain: mid-term outcomes from the CECaT randomised controlled trial
Source: PubMed Central journal article supplement — BMJ Open. 2014 Feb 7;4(2):e003419. doi: 10.1136/bmjopen-2013-003419 (PMC3918982; doi:10.1136/bmjopen-2013-003419), 2014-02-07
Supplement: bmjopen-2013-003419.draft_revisions.pdf [file bmjopen-2013-003419.draft_revisions.pdf]

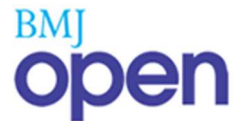

**Stress cardiovascular MR, stress SPECT and stress echocardiography are non- inferior to upfront invasive coronary angiography as gate-keepers in the investigation and management of patients with stable chest pain: mid term outcomes from the CECaT\* Trial (a randomised controlled trial)**

|                                 |                                                                                                                                                                                                                                                                                                                                                                                                                                                                                                      |
|---------------------------------|------------------------------------------------------------------------------------------------------------------------------------------------------------------------------------------------------------------------------------------------------------------------------------------------------------------------------------------------------------------------------------------------------------------------------------------------------------------------------------------------------|
| Journal:                        | <i>BMJ Open</i>                                                                                                                                                                                                                                                                                                                                                                                                                                                                                      |
| Manuscript ID:                  | bmjopen-2013-003419                                                                                                                                                                                                                                                                                                                                                                                                                                                                                  |
| Article Type:                   | Research                                                                                                                                                                                                                                                                                                                                                                                                                                                                                             |
| Date Submitted by the Author:   | 14-Jun-2013                                                                                                                                                                                                                                                                                                                                                                                                                                                                                          |
| Complete List of Authors:       | Thom, Howard; Institute of Public Health, Biostatistics West, Nicholas; Papworth Hospital, Cardiology<br>Hughes, Vikki; Papworth Hospital, Research & Development<br>Dyer, Matthew; Brunel University, Health Economics Research Group<br>Buxton, Martin; Brunel University, Health Economics Research Group<br>Sharples, Linda; Institute of Public Health, Biostatistics<br>Jackson, Christopher; Institute of Public Health, Biostatistics<br>Crean, Andrew; Toronto General Hospital, Cardiology |
| <b>Primary Subject Heading</b>: | Cardiovascular medicine                                                                                                                                                                                                                                                                                                                                                                                                                                                                              |
| Secondary Subject Heading:      | Health economics, Health policy, Health services research, Medical management, Radiology and imaging                                                                                                                                                                                                                                                                                                                                                                                                 |
| Keywords:                       | Adult cardiology < CARDIOLOGY, Ischaemic heart disease < CARDIOLOGY, Health economics < HEALTH SERVICES ADMINISTRATION & MANAGEMENT, Health policy < HEALTH SERVICES ADMINISTRATION & MANAGEMENT, Cardiology < INTERNAL MEDICINE, Cardiovascular imaging < RADIOLOGY & IMAGING                                                                                                                                                                                                                       |
|                                 |                                                                                                                                                                                                                                                                                                                                                                                                                                                                                                      |

SCHOLARONE™  
Manuscripts

1  
2  
3  
4 **Title: Stress cardiovascular MR, stress SPECT and stress echocardiography are**  
5 **non- inferior to upfront invasive coronary angiography as gate-keepers in the**  
6 **investigation and management of patients with stable chest pain: mid term**  
7 **outcomes from the CECaT\* Trial (a randomised controlled trial)**  
8  
9  
10  
11  
12

13 \*Cost Effectiveness of non-invasive Cardiac Testing  
14

15  
16 Howard Thom MSc, Nicholas West MD, FRCP, Vikki Hughes PhD, Matthew Dyer  
17  
18 MSc, Martin Buxton MSc, Linda D Sharples PhD, Christopher H Jackson PhD,  
19  
20 Andrew M Crean MRCP, FRCR  
21  
22  
23

#### 24 **Affiliations:**

25  
26 MRC Biostatistics Unit, Institute of Public Health, Cambridge CB2 0SR, UK, Howard Thom,  
27  
28 biostatistician; Department of Cardiology, Papworth Hospital, Cambridge, CB23 3RE, UK  
29  
30 Nicholas West, consultant cardiologist; Research and Development Office, Papworth  
31  
32 Hospital, Cambridge, CB23 3RE , UK ,Vikki Hughes senior research analyst; Health  
33  
34 Economics Research Group, Brunel University, Uxbridge, Middlesex UB8 3PH, UK, Matthew  
35  
36 Dyer, research fellow; Health Economics Research Group, Brunel University, Uxbridge,  
37  
38 Middlesex UB8 3PH, UK, Martin Buxton, professor; MRC Biostatistics Unit, Institute of Public  
39  
40 Health, Cambridge CB2 0SR, UK, Linda D Sharples, senior biostatistician; MRC Biostatistics  
41  
42 Unit, Institute of Public Health, Cambridge CB2 0SR, UK, Christopher H Jackson, senior  
43  
44 statistician; Division of Cardiology, Toronto General Hospital, Toronto, M5G 2C4, Canada,  
45  
46 Andrew M Crean, assistant professor of medicine & radiology.  
47  
48  
49

#### 50 **Corresponding**

51  
52 **author:** Dr Andrew Crean MRCP FRCR, Division of Cardiology, Toronto General  
53  
54 Hospital, 585 University Avenue, Toronto, ON, Canada M5G 2C4  
55  
56 **Tel:** 1 416 340 4800 **Fax:** 1 888 502 6601 **Email:** [andrew.crean@uhn.ca](mailto:andrew.crean@uhn.ca)  
57  
58  
59  
60

1  
2  
3 **Clinical Trial registration:** ISRCTN 47108462, UKCRN 3696  
4  
5

6  
7 **The CECaT study group were:**

8  
9 Johanna Armstrong, Martin Buxton, Noreen Caine, Richard Coulden, Andrew Crean,  
10

11 Matthew Dyer, Margaret Gillham, Hester Goddard, Kim Goldsmith, Vikki Hughes,  
12

13 Christopher Jackson, Evelyn Lee, Roger Patel, Peter Schofield, Linda Sharples, Emer  
14

15 Sonnex, David Stone, Carmen Treacy  
16  
17  
18  
19  
20  
21  
22  
23  
24  
25  
26  
27  
28  
29  
30  
31  
32  
33  
34  
35  
36  
37  
38  
39  
40  
41  
42  
43  
44  
45  
46  
47  
48  
49  
50  
51  
52  
53  
54  
55  
56  
57  
58  
59  
60

1  
2  
3 **Contributorship statement:**  
4

5  
6  
7 **HT, MD, MB, LDS, CHJ were involved in economic and statistical analysis. LDS was**  
8 **the senior project statistician, was involved in original study design and takes overall**  
9 **responsibility for statistical portion of the manuscript. All of these individuals**  
10 **contributed to drafting and revision of the manuscript.**  
11  
12

13  
14  
15  
16  
17 **VH was involved in study design, patient recruitment, data collection and project**  
18 **management from the projects inception to its conclusion. She also contributed to**  
19 **drafting and revision of the manuscript**  
20  
21

22  
23  
24  
25 **NW was responsible for blinded review of clinical data and contributed to drafting and**  
26 **revision of the manuscript.**  
27  
28

29  
30  
31 **AC was involved in the original study design, was responsible for the day-to-day**  
32 **clinical aspects of running the trial and was involved in the recruitment and follow up**  
33 **of patients as well as analysis of the cardiac MR studies. He wrote the final**  
34 **manuscript and contributed to its revision. He takes overall responsibility for the**  
35 **integrity of the clinical data.**  
36  
37  
38  
39  
40  
41  
42  
43  
44  
45  
46  
47  
48  
49  
50  
51  
52  
53  
54  
55  
56  
57  
58  
59  
60

1  
2  
3 **Article summary:**  
4

5 **Article focus:**  
6

- 7 1. Is non-invasive imaging a safe and appropriate gate-keeper to coronary  
8 angiography in patients with stable chest pain ?  
9  
10 2. Is there any difference in cost-effectiveness and cost-utility between the  
11 different non-invasive approaches and conventional coronary angiography  
12  
13 3. Are patients disadvantaged in any meaningful way by having a non-invasive  
14 test to decide whether they should go forward for coronary angiography ?  
15  
16 4. How does stress perfusion CMR compare to the more established tests of  
17 SPECT-MIBI and stress echocardiography as a gate-keeper to coronary  
18 angiography ?  
19  
20  
21  
22  
23  
24

25  
26  
27 **Key messages:**  
28

- 29 1. Non-invasive testing may be used safely as a gate-keeper to coronary  
30 angiography in patients with stable chest pain without any material  
31 disadvantage to them in terms of survival and quality of life up to 6 years after  
32 initial randomisation.  
33  
34 2. SPECT-MIBI appears marginally superior statistically to the other non-invasive  
35 methods although clinically meaningful differences are small between all  
36 strategies.  
37  
38 3. Stress perfusion CMR appears to be an effective technique in a stable out-  
39 patient population with undiagnosed chest pain.  
40  
41  
42  
43  
44  
45  
46  
47  
48

49 **Strengths and limitations:**  
50

- 51 1. This is the only large randomised prospective trial of a strategy of non-invasive  
52 gate-keeper cardiac imaging versus upfront angiography in the literature.  
53  
54 2. The cost-utility data are derived from NHS tariffs and our results are not  
55 necessarily directly transferrable to other healthcare systems  
56  
57  
58  
59  
60

1  
2  
3  
4  
5  
6  
7  
8  
9  
10  
11  
12  
13  
14  
15  
16  
17  
18  
19  
20  
21  
22  
23  
24  
25  
26  
27  
28  
29  
30  
31  
32  
33  
34  
35  
36  
37  
38  
39  
40  
41  
42  
43  
44  
45  
46  
47  
48  
49  
50  
51  
52  
53  
54  
55  
56  
57  
58  
59  
60

***Data sharing statement:***

**There are no additional data available**

For peer review only

## Abstract

### Background

A significant minority of patients with chest pain due to coronary artery disease (CAD) do not experience resolution of symptoms with revascularization. Coronary angiography is the standard for diagnosis, but early results from the CECaT trial showed that functional imaging tests can be used as a gateway for angiography. Cost-effectiveness is assessed in this paper up to 6 years after randomization.

### Methods

Patients were randomized to an initial test: angiography (control); Single Photon Emission Computed Tomography; stress cardiac magnetic resonance imaging (CMR); or stress echocardiography. It was recommended that follow-up angiography be performed only after a positive functional test. Clinical outcomes, quality of life and resource use up to 2 years post-treatment were used to estimate cost-effectiveness of each strategy compared to angiography. Incremental cost-effectiveness was assessed from an NHS perspective.

### Results

898 patients were randomized. Compared to angiography, mortality was marginally higher in the group randomized to CMR (hazard ratio 2.6, 95%CI 1.1, 6.2). There were no other significant differences between the groups in mortality, quality adjusted survival or costs.

### Conclusions

Non-invasive cardiac imaging can be used as the initial diagnostic test to diagnose CAD without adverse effects on patient outcomes or increased costs, relative to angiography.

**Key words:** MRI, cardiovascular magnetic resonance, comparative effectiveness, SPECT, stress echo, coronary angiography

## Introduction

CAD is common and its management is costly <sup>(1)</sup>. Revascularisation using bypass surgery (CABG) or percutaneous coronary intervention (PCI) is effective for patients with severe disease <sup>(2)</sup> but a significant minority of patients do not gain symptomatic relief <sup>(3)</sup>. Data from the COURAGE trial have demonstrated the lack of prognostic benefit from revascularization in the absence of reversible ischemia <sup>(4)</sup>. The yield of coronary angiography is variable with one recent large study of nearly 400, 000 patients demonstrating a normalcy rate approaching 40% <sup>(5)</sup>. Therefore non-invasive testing to identify those with a low likelihood of obstructive CAD may be safer, cheaper and more appropriate than upfront angiography. This approach is codified in multiple AHA/ACC guidelines on the investigation of stable or suspected angina pectoris in which initial non-invasive imaging is rated as highly appropriate <sup>(6) (7) (8) (9)</sup>.

The 'Cost-Effectiveness of non-invasive Cardiac Testing' (CECaT) trial was designed to assess three functional tests - stress echocardiography, single photon emission computed tomography (SPECT) and stress cardiac magnetic resonance imaging (CMR) - as a gatekeeper to coronary angiography (CA) in patients referred for CA with suspected coronary artery disease (CAD). Early clinical and cost-effectiveness estimates have been published and showed that the CMR group had slightly lower mean exercise treadmill time according to the Bruce protocol but otherwise the tests could be considered equally effective <sup>(10)</sup>. This report provides the main cost-effectiveness and mortality outcomes up to 6 years after randomisation.

## Methods

### Study design

The design of the study has been described elsewhere <sup>(10)</sup> and is reviewed briefly here. All patients referred to Papworth Hospital, UK for non-urgent angiography were eligible for the



1  
2  
3 study. Inclusion criteria were: established or suspected chronic stable angina and a positive  
4  
5 ETT result with subsequent referral for angiography. Exclusion criteria were: recent MI (<3  
6  
7 months), revascularisation (<6 months); urgent need for revascularisation; contra-indication  
8  
9 to adenosine or CMR; inability to exercise.

10  
11  
12  
13 Trial design was of four parallel arms with a 1:1:1:1 randomisation ratio. Randomisation was  
14  
15 computer generated and stratified according to Pryor risk assessment<sup>(11)</sup>. Within each Pryor  
16  
17 risk group, randomisation was in blocks of length 6 or 8. Sequentially numbered group  
18  
19 designation was held in the Research & Development (R&D) Office and was not available to  
20  
21 trial personnel. Patients were randomised to their initial diagnostic test - stress SPECT,  
22  
23 stress CMR, stress echocardiography, or angiography - by R&D within 4 weeks of  
24  
25 recruitment and only after they had given consent and been registered.

26  
27  
28  
29 Non invasive imaging results were returned with a recommendation to proceed with  
30  
31 angiography only when reported as 'positive' for inducible ischemia. Protocol adherence to  
32  
33 this recommendation was not mandated by trial design and patients proceeded to  
34  
35 angiography if considered clinically indicated. Treatment with PCI or CABG (performed  
36  
37 within six months of angiography) or to medical therapy was according to standard practice.

### 41 42 **Coronary angiography.**

43  
44 Standard diagnostic angiography was performed from the right femoral artery approach<sup>(12)</sup>.  
45  
46 A minimum of 5 views of the left and 3 views of the right coronary system were taken<sup>(13)</sup>. All  
47  
48 examinations were reported by an experienced staff cardiologist and segmental location of  
49  
50 disease (if any) recorded.

### 51 52 53 54 **Stress echocardiography**

55  
56 Beta-blocker medications were stopped 2 days beforehand. Dobutamine was infused at  
57  
58 rates of 10- 40 mcg/kg/min, increased at 3 minute intervals. If necessary, 300-600  
59  
60

1  
2  
3 micrograms of atropine were added at peak stress to achieve 90% of target heart  
4 rate. Images were acquired in standard planes in the final minute of each 3 minute stage.  
5  
6 Intravenous microspheres were used to delineate the endocardial surface. All examinations  
7  
8 were reported by one of two staff cardiologists experienced in stress echocardiography.  
9  
10 Studies were positive for ischemia if stress-induced deterioration in contractility was  
11  
12 observed.  
13

### 14 15 16 17 **SPECT**

18  
19 Rest/stress 99mTc sestamibi (99mTc MIBI) SPECT was performed (2 day protocol). A 6  
20  
21 minute adenosine infusion (140 µg/kg/min) was employed. 400 MBq 99m-Tc MIBI was  
22  
23 administered at 3 minutes after infusion of adenosine was started. Gated SPECT imaging  
24  
25 occurred 60 minutes after injection. Tomographic images were assessed for fixed and  
26  
27 reversible defects by a single observer (as per established criteria)<sup>(14)</sup>.  
28  
29

### 30 31 **CMR**

32  
33 Stress CMR imaging was performed as currently recommended by the Society of  
34  
35 Cardiovascular Magnetic Resonance <sup>(15)</sup>. A 1.5T mobile CMR system and 4-channel phased  
36  
37 array surface coil were used (Signa CV/i, GE Medical Systems). Stress/rest dynamic first-  
38  
39 pass perfusion imaging was performed. A hybrid fast gradient echo/echoplanar sequence  
40  
41 was employed <sup>(16)</sup>. Adenosine was infused at 140 mcg/kg/min for 4 minutes. After 3 minutes,  
42  
43 a bolus of Gadolinium-DTPA (0.1mmol/kg) was delivered at 5mls/sec, followed by a 25ml  
44  
45 saline flush. First-pass imaging of the heart occurred over 80 heart beats. A volumetric  
46  
47 notched-saturation pre-pulse preserved a constant saturation-recovery time during slice  
48  
49 acquisition <sup>(17)</sup>. 6-8 short axis slices were obtained every 2 heart beats. Rest imaging was  
50  
51 repeated after a minimum interval of 15 minutes. Studies were reported as positive if there  
52  
53 was an inducible perfusion defect visible for at least 5 frames either: a) in a region of normal  
54  
55 wall thickness; or b) in a region of myocardial thinning in the absence of a history of prior  
56  
57 myocardial infarction.  
58  
59  
60

## Outcomes

The primary outcomes of this follow up study were survival up to a minimum of 2 years post-treatment, quality-adjusted survival and cost-utility of each strategy. Survival status was determined from the Office for National Statistics database, UK (<http://www.ons.gov.uk/>).

## Sample size calculations

The sample size was based on exercise performance and was calculated according to the methodology published in the initial report of the CECaT study <sup>(10)</sup>.

## Statistical and economic analysis

For this study, survival was summarised using Kaplan-Meier estimates and the groups were compared using Cox proportional hazards regression. In sensitivity analysis CABG and PCI were included in the regression analyses as time-dependent covariates to ensure that any differences between the groups was not due to differences in treatment. Inclusion of treatment did not affect comparison of treatment strategies and results of these analyses are not included here.

Patient-specific hospital resource use was collected for 2 years post-treatment with revascularisation or medical management. Costs were based on National Health Service 2008/09 prices. Costs available from previous years were inflated using the Hospital and Community Health Services Pay and Prices Index <sup>(18)</sup>. An annual discount rate of 3.5% was applied to all costs and quality-adjusted life-years (QALYs) after 12 months post-randomisation. Resources costed were: imaging tests; revascularisation; inpatient/outpatient episodes; adverse events; cardiac-related medications. Patient-reported admissions for MI were verified with the admitting hospital and adjudicated.

1  
2  
3 Patients completed the EuroQoL EQ-5D questionnaire <sup>(19)</sup> at baseline randomisation, 6  
4 months post-treatment, 18 months post-randomization, 18 months post-treatment and 24  
5 months post-treatment. The social tariff for the EQ-5D was applied in order to calculate  
6 utility values <sup>(20)</sup>. For exploratory purposes daily utilities were estimated using linear  
7 interpolation.  
8  
9  
10  
11  
12

13  
14  
15 Quality adjusted survival and cost estimates were censored at the last follow up so that  
16 mean values over a range of time horizons were estimated using inverse weighting methods  
17 <sup>(21)</sup>. In the base case we used a time horizon of 3 years since it was the longest period over  
18 which results were stable, with acceptable precision. Confidence intervals for costs and  
19 QALYs were estimated using bootstrapping with 5000 samples <sup>(22)</sup>.  
20  
21  
22  
23  
24  
25  
26

### 27 **Sensitivity analysis**

28  
29 Sensitivity of cost-utility results for different time horizons was assessed by re-estimating  
30 results up to 12, 18, 24, 36 and 48 months after randomization. In addition, cardiologists  
31 were divided into interventional and non-invasive according to their usual practice, and  
32 results were recalculated for each subgroup. With the exception of this *post-hoc* data  
33 interrogation, all other results presented derive from intention-to-treat analysis.  
34  
35  
36  
37  
38  
39  
40

41 The study had IRB approval and full written informed consent was obtained from all  
42 participants. All authors had full access to the data and take responsibility for the manuscript  
43 as written.  
44  
45  
46  
47  
48

## 49 **Results**

### 50 **Recruitment and compliance**

51  
52  
53 Between September 2001 and September 2004, 3,201 patients were assessed, 1,981 were  
54 excluded and 322 refused entry to the trial. Refusals were more likely to come from women  
55  
56  
57  
58  
59  
60

1  
2  
3 (46% compared with 31% enrolled into the study,  $p<0.001$ ) and were significantly older  
4  
5 (mean age 64.6, (SD 10.1) compared with study group mean age 61.8, (9.4),  $p<0.001$ ).  
6  
7

8  
9 898 patients were randomised. Groups were well matched at baseline (table 1). In each  
10  
11 group 69% of patients were high risk for CAD (Pryor score  $> 0.8$ ). The trial was closed to  
12  
13 recruitment in September 2004 after enrolling the pre-specified number of subjects.  
14

15  
16  
17 One-hundred-seventy-five (78%) SPECT patients, 180 (80%) CMR patients and 169 (75%)  
18  
19 stress echo patients were referred on for angiography (**Figure 1**). Between 20% and 25% of  
20  
21 patients undergoing non-invasive tests did not require further investigation. Four patients  
22  
23 died and four withdrew from the trial early on. Of the remaining patients, revascularization  
24  
25 was required in 34% (301/890). There was no significant difference between the groups in  
26  
27 patient management (**Figure 1**).  
28

### 31 **Survival**

32  
33 During the study there were 43 deaths (4.8%). Kaplan-Meier survival curves for the 4 groups  
34  
35 are plotted in **Figure 2**. SPECT and stress echo groups were not significantly different from  
36  
37 angiography. The CMR group had higher mortality than the angiography group, the hazard  
38  
39 ratio was 2.6 (95%CI 1.1 to 6.2),  $p=0.032$  (**Table 2**). The significant effect of CMR on  
40  
41 survival remained when CABG or PCI were included in the models. However, mortality was  
42  
43 low in all groups and the absolute mean difference in survival was less than 1 month over 3  
44  
45 years (**Table 2**). Mean survival estimates over 3 years with 95% confidence intervals are  
46  
47 shown in **Table 2**.  
48

49  
50  
51 There were 178 non-fatal adverse events in 116 patients, mostly hospital admissions for  
52  
53 chest pain.  
54

### 58 **Cost-utility**

1  
2  
3 **Table 3** shows some of the highest incurred follow up costs for the 4 groups and shows that  
4 patient management varied substantially between individuals. Although angiography was the  
5 most expensive of the four initial diagnostic tests, the strategy of initial angiography had  
6 lower mean overall cost than stress echo, and was similar to CMR up to 3 years (**Table 2**).  
7  
8 Extra costs for patients in the three non-invasive groups was largely due to patients  
9 undergoing follow-on angiography. There were no significant differences in overall costs  
10 between the groups.  
11  
12

13  
14  
15  
16  
17  
18  
19 During the study there were no significant differences in EQ-5D between the groups. **Figure**  
20 **3** shows daily mean EQ-5D utility over time based on interpolation between measurements  
21 for survivors who completed the EQ-5D. Using inverse-weighting we calculated QALYs over  
22 different time horizons and these are presented up to 3 years in Table 2. Mean QALYs over  
23 3 years in the angiography group was 2.24, which was not significantly different from the  
24 other groups. The mean differences between groups are so close to zero in all 3 cases that  
25 the cost per QALY estimates are unstable and a cost-minimization approach may be more  
26 appropriate. This would favour SPECT.  
27  
28  
29  
30  
31  
32  
33  
34  
35  
36  
37

### 38 **Sensitivity analysis**

39 The comparisons between the diagnostic strategy groups did not change substantially when  
40 we varied the time horizon; the main effect of this was that the variation surrounding  
41 estimates increased as the time horizon lengthened due to the heavy censoring (results not  
42 shown). **Tables 2a and 2b** show results for interventional and non-invasive cardiologists  
43 respectively. Patients who were managed by interventional cardiologists incurred higher  
44 costs due to the greater number of tests and revascularization procedures performed, with  
45 minimal incremental benefit in QALY.  
46  
47  
48  
49  
50  
51  
52  
53  
54

### 55 **Discussion**

1  
2  
3 CECaT is the first completed prospective randomized trial to look at the clinical and cost-  
4 effectiveness of non-invasive imaging in the diagnosis and management of angina. To the  
5 best of the authors' knowledge there has been no comparable outcomes trial published on  
6 this scale evaluating three independent non-invasive 'gatekeeper' modalities versus initial  
7 angiography in stable chest pain. The trial is also unusual in the length of prospective follow  
8 up extending to 6 years for mortality outcomes.  
9  
10  
11  
12  
13  
14

15  
16  
17 We have demonstrated that use of any one of stress CMR, stress echo or stress SPECT as  
18 the initial test for a stable chest pain patient leads to non-inferior outcomes in quality of life  
19 and cost utility compared to patients randomised to upfront invasive coronary angiography.  
20 Typically, non invasive tests perform well in low risk populations because of a negative  
21 predictive value which is usually better than the positive predictive value. However, the  
22 patient risk profile was relatively high in our study, and despite this there was no significant  
23 difference between an initial functional or anatomic approach.  
24  
25  
26  
27  
28  
29  
30  
31  
32

33 There are several reasons why initial angiography may not have led to clear benefit in our  
34 study. Firstly, although angiography has stood at the heart of the diagnostic chest pain  
35 pathway, the traditional binary cut-off values of 50% or 70% percentage stenosis by visual  
36 estimation were shown in the FAME study to bear little relation to the true physiologic  
37 significance of luminal narrowing <sup>(23)</sup>.  
38  
39  
40  
41  
42  
43  
44

45 Secondly, data from various countries suggest that not only is coronary angiography often  
46 inappropriate when formally rated by expert observers <sup>(24) (25)</sup> but that disparate national or  
47 regional rates of angiography do not translate into clear mortality benefits between countries  
48 <sup>(26) (27) (28) (29)</sup> and on occasion may even demonstrate an inverse relationship <sup>(30)</sup>.  
49  
50  
51  
52  
53

54 Contemporary US data from approximately 500,000 PCI procedures collected prospectively  
55 in the National Cardiovascular Data Registry demonstrated that, of 145,000 elective PCI  
56 cases, roughly 12% were judged inappropriate. Furthermore, the rate of inappropriate  
57  
58  
59  
60

1  
2  
3 elective PCI between hospital sites ranged from 0-55% suggesting significant variability in  
4 practice <sup>(31)</sup>. The data suggest a better way of selecting patients for invasive investigation is  
5  
6  
7 needed.

8  
9  
10  
11 Ischemia-driven revascularisation has been shown to be of benefit in a number of trials,  
12  
13 most recently in the FAME study in which an invasive method of measuring the flow reserve  
14  
15 of the microcirculation (Fractional Flow Reserve, FFR) was used to allocate patients to  
16  
17 intervention or observation vs a clinical decision on intervention based on angiography alone  
18  
19 <sup>(32)</sup>. At 2 years follow up there were clear survival and MACE benefits to the FFR-based  
20  
21 approach.  
22  
23

24  
25 The ACRE study reported that, up to 6 years after diagnosis, medical management was a  
26  
27 more cost-effective strategy for angina compared with PCI <sup>(33)</sup>. The lack of evidence for  
28  
29 survival from revascularisation - except for selected patients with evidence of ischemia - was  
30  
31 also seen in the COURAGE trial <sup>(4)</sup>. Critics have suggested this may be because  
32  
33 randomization to PCI versus OMT was made *after* coronary angiography had been  
34  
35 performed, potentially leading to a recruitment bias of patients with less severe disease. In  
36  
37 the CECaT trial this bias was avoided by randomization to a management strategy defined  
38  
39 by the non-invasive test result for each of the 3 functional arms of the trial. In a relatively  
40  
41 high risk population, we demonstrated no clinically significant survival or economic detriment  
42  
43 from using non-invasive imaging as a gate-keeper to catheterization. Similarly, quality of life  
44  
45 was not significantly different across all four groups and these differences extended to a  
46  
47 warranty period of at least 3 years.  
48  
49

50  
51 We did observe a marginal decrease in survival in the CMR arm. The reasons for the  
52  
53 difference are unclear but do not relate to patient characteristics or management with CABG  
54  
55 or PCI. Although statistically significant, the mean survival difference from the other groups  
56  
57 was only 4 weeks over 3 years and is unlikely to be clinically meaningful. Since recent work  
58  
59  
60



1  
2  
3 has established a strong correspondence between FFR measurements and stress CMR  
4 perfusion indices it would be surprising if CMR were genuinely inferior to other modalities for  
5 risk stratification <sup>(34)</sup>. Indeed several recent publications have highlighted the incremental  
6 prognostic data (above that obtained from clinical variables) derived from several thousand  
7 perfusion CMR studies <sup>(35) (36)</sup>.  
8  
9  
10  
11  
12

13  
14  
15 Given the recent publication of the CEMARC trial <sup>(37)</sup> in which a clear diagnostic superiority  
16 was demonstrated for stress CMR over SPECT, it is interesting that our data nonetheless  
17 show an equivalence in functional health status between those randomized to SPECT  
18 versus CMR in the CECaT trial. The implication may be that although CMR detects the  
19 presence of *any* ischemia with a greater sensitivity it is the *overall burden* of ischemia that  
20 alters a patient's prognosis. As such, it has not yet been demonstrated that the higher  
21 diagnostic accuracy of CMR translates into better long-term patient outcomes – a fact  
22 acknowledged by Greenwood et al subsequent to CEMARC's publication <sup>(38)</sup>. In this context  
23 the CECaT nuclear results are congruent with numerous past publications and reconfirm the  
24 reassuring warranty period of a normal SPECT study.  
25  
26  
27  
28  
29  
30  
31  
32  
33  
34  
35  
36

### 37 **Cost effectiveness**

38  
39 There was no significant difference in cost-effectiveness between the angiography -as-  
40 default group and the non-invasive test groups up to 3 years, perhaps relating to the higher-  
41 than-anticipated rate of referral for angiography after negative functional tests. Protocol  
42 deviation of this kind is not infrequent in trials of non-invasive technology. In the recent  
43 PARR-2 study of patients undergoing fluorodeoxyglucose positron emission tomography for  
44 the assessment of viability, roughly 25 % of the study population did not adhere to protocol  
45 <sup>(39)</sup>. The willingness of a cardiologist to defer referral for coronary angiography in the face of  
46 a normal non-invasive study may in part reflect individual prejudices and job description  
47 (interventional versus non-invasive) as demonstrated in a recent survey of cardiology  
48 attitudes <sup>(40)</sup> and was also reflected in our own data.  
49  
50  
51  
52  
53  
54  
55  
56  
57  
58  
59  
60

1  
2  
3  
4  
5 In CECaT, 20-25% of patients receiving a non-invasive test did not go on to have  
6 angiography. A proportion of the additional cost in the non-invasive arms related to  
7 angiography and PCI in the patients with a *negative* test, although only very few  
8 subsequently required CABG - a robust marker of significant disease - during follow-up. This  
9 readiness to employ PCI in a group in whom the indication/benefit is debatable was also  
10 seen in the ACRE trial <sup>(33)</sup> and reflects understandable clinical response to uncertainty but  
11 also the easy access to PCI in healthcare systems without barriers to self-referral <sup>(41)</sup>.  
12  
13 Similarly, studies from the US have demonstrated a greater willingness to use coronary  
14 angiography when available 'on site' as is increasingly seen even in small-to-medium sized  
15 hospitals <sup>(42) (43) (44)</sup>.

### 26 27 **Cost effectiveness of each non-invasive technique**

28  
29  
30  
31 Nuclear myocardial perfusion imaging

32  
33  
34  
35 The END study used propensity matching to compare a large cohort of patients referred for  
36 either gate-keeper myocardial perfusion imaging or upfront angiography – this non  
37 randomised study demonstrated a significant cost reduction in the <sup>(45)</sup> nuclear arm. In  
38 contrast to this and other work <sup>(46) (47) (48)</sup> we were unable to show a significant difference in  
39 cost effectiveness in our own study. To some extent this reflected the participating physician  
40 bias towards angiography during the period of trial recruitment (2001-2006) with many  
41 patients referred for angiography despite normal perfusion studies. This continues in the  
42 contemporary era with Chan et al demonstrating that almost 80% of Delphi-adjudicated  
43 inappropriate elective PCIs were performed following either low risk ischemia imaging in  
44 mildly symptomatic patients or intermediate risk imaging in entirely asymptomatic patients  
45  
46  
47  
48  
49  
50  
51  
52  
53  
54  
55  
56 <sup>(31)</sup>.

1  
2  
3 In the CECaT study, when PCI was performed despite a negative initial non-invasive test,  
4 this occurred because subsequent angiography indicated 'significant' stenosis. This was a  
5 clinical judgment based on 'eyeball assessment' of lesion severity as has been reported in  
6 clinical trials with angiographic end points <sup>(49)</sup>. However, the severity and functional  
7 significance of many stenoses may be over-called, even by quantitative assessment, when  
8 compared with physiological assessment of fractional flow reserve across the lesion <sup>(50)</sup> <sup>(51)</sup>.  
9 Further improvement in cost-effectiveness could likely have been achieved in the nuclear  
10 arm of the trial. Our post-trial practice is to perform the stress SPECT first - and if this is  
11 negative - cancel the rest test, likely augmenting the relative cost-effectiveness of SPECT  
12 <sup>(52)</sup>.

#### 23 24 25 CMR

26  
27 There are no other real-world data in the literature of which the authors are aware regarding  
28 the cost effectiveness of CMR .  
29  
30  
31

#### 32 33 Stress echo

34  
35 Stress echocardiography may be a more cost-effective strategy than angiography for men  
36 aged 50-60 with CAD prevalence of 50%<sup>(53)</sup>,<sup>47</sup>. There is also some evidence that stress echo  
37 is more cost-effective than SPECT as an initial test <sup>(54)</sup> <sup>(55)</sup>, especially in women with  
38 suspected CAD <sup>(56)</sup>. A similar benefit was not seen in our study probably because of the high  
39 disease prevalence in our population. The lack of superiority of either stress  
40 echocardiography or a combined strategy of exercise testing and stress echo compared to  
41 upfront catheterisation was also evident in a recent Polish study of 600 patients with a  
42 similar age, gender and disease prevalence to our own study population <sup>(57)</sup>.  
43  
44  
45  
46  
47  
48  
49  
50  
51

52  
53  
54 Taken overall, our data clearly demonstrate a limited future role for cost-effective non-  
55 invasive imaging if referring physicians are not willing to accept a negative result as ground  
56 truth. This might be interpreted as reflecting a need for greater physician education since we  
57  
58  
59  
60

1  
2  
3 showed a clear difference in onward referral rates for angiography after a negative test  
4  
5 between interventional and non-invasive cardiologists.  
6  
7

### 8 9 ***Clinical effectiveness***

10 We demonstrated that SPECT can obviate the need for coronary angiography for a  
11  
12 significant number of patients without any clinical detriment. In the stress echo group clinical  
13  
14 outcomes were also comparable to the angiography subgroup at 18 months. The CMR  
15  
16 group had statistically marginally poorer survival and this follows our earlier finding that CMR  
17  
18 patients had significantly worse exercise tolerance at 18 months after randomisation<sup>(10)</sup>. This  
19  
20 is difficult to explain on the basis of Pryor risk score or other baseline clinical variables.  
21  
22 However, the mean difference in survival between the CMR arm and the other groups was  
23  
24 only 4 weeks and thus of marginal clinical significance. More importantly, the CMR group  
25  
26 were not otherwise disadvantaged – compared to the angiographic control group - with  
27  
28 respect to major adverse events, other resource use, or quality of life.  
29  
30  
31

### 32 33 ***Limitations***

34  
35 This study was carried out in a single specialist cardiothoracic centre with a significant  
36  
37 proportion of high risk, predominantly white European, male patients. Those eligible who  
38  
39 refused the trial were older and were more likely to be women.  
40  
41  
42

43 We used the technology that was available to us at the onset of the trial. At that time, we  
44  
45 were not able to use attenuation correction for SPECT imaging; however this was also not  
46  
47 used in the much more recent CEMARC trial<sup>(37)</sup>. Similarly, we performed our CMR exams in  
48  
49 a mobile facility on a 1.5T scanner with only modest coil technology and limited temporal and  
50  
51 anatomic coverage that would compare unfavourably with the 3T whole heart high resolution  
52  
53 perfusion studies available today.  
54  
55  
56  
57  
58  
59  
60

1  
2  
3 The trial aimed to reflect the strategy of using non-invasive imaging as a gateway to  
4 angiography in *contemporary clinical practice*. The test results were considered in  
5  
6 conjunction with other information available at the time. Thus it was not the aim to formally  
7  
8 assess diagnostic accuracy of the non-invasive tests in this context. This trial-based study  
9  
10 was limited to 3 year cost-effectiveness follow up - longer-term economic models would  
11  
12 provide lifetime estimates of the cost-effectiveness of the non-invasive strategies.  
13  
14

### 15 16 17 **Conclusions**

18  
19 We have demonstrated in the CECaT trial that stress echo, stress CMR and stress SPECT  
20  
21 may each be used to defer invasive coronary angiography without clinical detriment or  
22  
23 significant excess costs in an outpatient population with stable chest pain.  
24  
25

### 26 27 **Acknowledgements**

28  
29  
30  
31 The original CECaT study was funded by a grant from the UK National Health  
32  
33 Service R&D Health Technology Assessment Program (project no. 99/26/04). HT, CJ and  
34  
35 LDS were supported by the Medical Research Council [Programme number U015232027].  
36  
37  
38

### 39 40 **Competing interests**

41  
42  
43 All authors have completed the ICMJE uniform disclosure form at  
44  
45 [http://www.icmje.org/coi\\_disclosure.pdf](http://www.icmje.org/coi_disclosure.pdf) and declare: support from the UK National Health  
46  
47 Service R&D Health Technology Assessment Program (project no. 99/26/04) and the UK  
48  
49 Medical Research Council [Programme number U015232027] for the submitted work ; no  
50  
51 financial relationships with any organisations that might have an interest in the submitted  
52  
53 work in the previous three years; no other relationships or activities that could appear to  
54  
55 have influenced the submitted work  
56  
57  
58  
59  
60

**Exclusive licence statement**

The Corresponding Author has the right to grant on behalf of all authors and does grant on behalf of all authors, an exclusive licence (or non exclusive for government employees) on a worldwide basis to the BMJ Publishing Group Ltd and its Licensees to permit this article (if accepted) to be published in BMJ editions and any other BMJ PGL products and sublicences to exploit all subsidiary rights, as set out in our licence

( <http://resources.bmj.com/bmj/authors/checklists-forms/licence-for-publication>).

**Contributorship statement**

HT performed literature review, data analysis and interpretation; NW was involved in image analysis, drafting the manuscript and critical revision; VH was involved in recruiting the patients, data management, administering health questionnaires, data analysis and drafting the manuscript; MD and MB were responsible for data analysis, health economic assessment, drafting the manuscript and critical revision; LDS was responsible for study design, trial management, statistical analysis, drafting the manuscript and critical revision; CJ performed statistical and health economic analysis, drafting the manuscript and critical revision; AMC was involved in study design, patient recruitment, image interpretation, trial management, drafting the manuscript and critical revision and is the overall guarantor of manuscript integrity.

All authors have read the manuscript in its submitted form and have provided final approval for publication.

**Table 1 Baseline characteristics\***

|                                         | Angiography<br>(n=222) | SPECT<br>(n=224) | Cardiac MRI<br>(n=226) | Stress Echo<br>(n=226) |
|-----------------------------------------|------------------------|------------------|------------------------|------------------------|
| Demographics                            |                        |                  |                        |                        |
| Mean (SD) age (years)                   | 60.7 (9.1)             | 62.1 (9.5)       | 62.2 (9.0)             | 61.9 (9.9)             |
| Males (%)                               | 149 (67%)              | 157 (70%)        | 153 (68%)              | 160 (71%)              |
| Mean (SD) BMI (kg/m <sup>2</sup> )      | 27.6 (4.2)             | 27.3 (4.3)       | 28.0 (4.4)             | 27.9 (4.2)             |
| History/risk factors                    |                        |                  |                        |                        |
| Previous MI (%)                         | 63 (28%)               | 52 (23%)         | 69 (31%)               | 59 (26%)               |
| Previous CVA (%)                        | 10 (5%)                | 13 (6%)          | 8 (4%)                 | 12 (5%)                |
| Peripheral VD (%)                       | 20 (9%)                | 21 (9%)          | 17 (8%)                | 18 (8%)                |
| Diabetes(%)                             |                        |                  |                        |                        |
| IDDM                                    | 12 (5%)                | 8 (4%)           | 11 (5%)                | 5 (2%)                 |
| NIDDM                                   | 16 (7%)                | 18 (8%)          | 21 (9%)                | 22 (10%)               |
| Family history CAD                      | 60 (27%)               | 55 (25%)         | 63 (28%)               | 59 (26%)               |
| Smoking history (%)                     |                        |                  |                        |                        |
| <25 pack years                          | 149 (67%)              | 162 (72%)        | 148 (65%)              | 155 (69%)              |
| >=25 pack years                         | 73 (33%)               | 62 (28%)         | 78 (35%)               | 71 (31%)               |
| Treated hyperlipidaemia                 | 164 (74%)              | 171 (76%)        | 179 (79%)              | 179 (79%)              |
| (%)                                     |                        |                  |                        |                        |
| Treated hypertension (%)                | 117 (53%)              | 132 (59%)        | 115 (51%)              | 129 (57%)              |
| Exercise tolerance <sup>a</sup>         |                        |                  |                        |                        |
| Mean (SD) total exercise<br>time (mins) | 11.29 (4.56)           | 10.46 (4.41)     | 10.43 (4.43)           | 10.89 (4.36)           |
| Angina during EET                       | 108 (49%)              | 96 (43%)         | 111 (49%)              | 117 (52%)              |
| ECG changes on exercise test            |                        |                  |                        |                        |
| 1-2 mm ST depression<br>with symptoms   | 53 (24%)               | 43 (19%)         | 54 (24%)               | 57 (25%)               |

|                         |           |           |           |           |
|-------------------------|-----------|-----------|-----------|-----------|
| >= 2mm ST depression    | 16 (7%)   | 24 (11%)  | 20 (9%)   | 24 (11%)  |
| without symptoms        |           |           |           |           |
| ST elevation/ no change | 153 (69%) | 157 (70%) | 152 (67%) | 145 (64%) |
| <hr/>                   |           |           |           |           |
| CCS class               |           |           |           |           |
| 0-I                     | 60 (27%)  | 54 (24%)  | 78 (35%)  | 58 (26%)  |
| II                      | 138 (62%) | 144 (64%) | 122 (54%) | 132 (58%) |
| III-IV                  | 24 (11%)  | 26 (12%)  | 26 (11%)  | 36 (16%)  |

\* There were no significant differences between the groups in any variable



**Table 2 Cost-effectiveness summaries to 3 years post randomization**

|                           | Angiography<br>(n=222) | SPECT<br>(n=224) | Cardiac MRI<br>(n=226) | Stress Echo<br>(n=226) |
|---------------------------|------------------------|------------------|------------------------|------------------------|
| Hazard ratio for death    | Baseline               | 0.99             | 2.60                   | 1.42                   |
| (95%CI)                   |                        | (0.35,2.85)      | (1.09,6.22)            | (0.54,3.74)            |
| Mean survival (years)     | 2.96                   | 2.95             | 2.90                   | 2.94                   |
| (95%CI)                   | (2.92, 2.99)           | (2.90, 2.99)     | (2.83, 2.95)           | (2.89, 2.97)           |
| Mean difference vs. CA    | -                      | -0.01            | -0.06                  | -0.02                  |
| (95%CI)                   | -                      | (-0.07,0.05)     | (-0.14, 0.01)          | (-0.08, 0.04)          |
| Mean QALYs                | 2.24                   | 2.27             | 2.18                   | 2.27                   |
| (95%CI)                   | (2.16,2.30)            | (2.20,2.33)      | (2.11,2.25)            | (2.20,2.33)            |
| Mean difference vs. CA    | -                      | 0.03             | -0.05                  | 0.03                   |
| (95%CI)                   | -                      | (-5.30,1.20)     | (-4.50,2.01)           | (-3.08,3.95)           |
| Mean discounted costs (£) | 5189                   | 4549             | 4839                   | 5421                   |
| (95%CI)                   | (4235, 6410)           | (4095, 5030)     | (4363, 5329)           | (4753, 6148)           |
| Mean difference vs. CA    | -                      | -640             | -349                   | 232                    |
| (95%CI)                   |                        | (-1933, 436)     | (-1642, 735)           | (-1123, 1441)          |

**Table 2a Cost-effectiveness summaries for patients managed by interventional cardiologists to 3 years post randomization**

|                           | Angiography<br>(n=222) | SPECT<br>(n=224) | Cardiac MRI<br>(n=226) | Stress Echo<br>(n=226) |
|---------------------------|------------------------|------------------|------------------------|------------------------|
| Mean survival (years)     | 2.96                   | 2.97             | 2.89                   | 2.96                   |
| (95%CI)                   | (2.91, 2.98)           | (2.93, 3.00)     | (2.80, 2.97)           | (2.90, 2.98)           |
| Mean difference vs. CA    | -                      | 0.01             | -0.07                  | 0                      |
| (95%CI)                   | -                      | (-0.05,0.07)     | (-0.17, 0.02)          | (-0.07,0.05)           |
| Mean QALYs                | 2.25                   | 2.29             | 2.21                   | 2.2                    |
| (95%CI)                   | (2.14,2.36)            | (2.19,2.38)      | (2.10,2.32)            | (2.09,2.29)            |
| Mean difference vs. CA    | -                      | 0.03             | -0.04                  | -0.06                  |
| (95%CI)                   | -                      | (-5.48,2.06)     | (-5.22,2.21)           | (-3.11,6.17)           |
| Mean discounted costs (£) | 5664                   | 5095             | 5176                   | 6198                   |
| (95%CI)                   | (4591, 6862)           | (4361, 5882)     | (4476, 5887)           | (5028, 7521)           |
| Mean difference vs. CA    | -                      | -569             | -487                   | 534                    |
| (95%CI)                   | -                      | (-2001, 751)     | (-1906, 806)           | (-1136, 2251)          |

**Table 2b Cost-effectiveness summaries for patients managed by non-interventional cardiologists to 3 years post randomization**

|                           | Angiography<br>(n=222) | SPECT<br>(n=224) | Cardiac MRI<br>(n=226) | Stress Echo<br>(n=226) |
|---------------------------|------------------------|------------------|------------------------|------------------------|
| Mean survival (years)     | 2.95                   | 2.93             | 2.9                    | 2.92                   |
| (95%CI)                   | (2.89, 2.99)           | (2.85, 2.98)     | (2.81, 2.97)           | (2.85, 2.98)           |
| Mean difference vs. CA    | -                      | -0.02            | -0.05                  | -0.03                  |
| (95%CI)                   | -                      | (-0.11,0.06)     | (-0.15, 0.04)          | (-0.11, 0.05)          |
| Mean QALYs                | 2.23                   | 2.25             | 2.17                   | 2.32                   |
| (95%CI)                   | (2.14,2.31)            | (2.16,2.33)      | (2.07,2.26)            | (2.23,2.41)            |
| Mean difference vs. CA    | -                      | 0.02             | -0.06                  | 0.09                   |
| (95%CI)                   | -                      | (-7.32,1.90)     | (-5.98,3.37)           | (-5.84,3.39)           |
| Mean discounted costs (£) | 4924                   | 4151             | 4637                   | 4693                   |
| (95%CI)                   | (3639, 6731)           | (3583, 4748)     | (3994, 5307)           | (4054, 5365)           |
| Mean difference vs. CA    | -                      | -774             | -287                   | -231                   |
| (95%CI)                   | -                      | (-2672, 692)     | (-2183,1229)           | (-2133, 1238)          |

**Table 3 Summary of the frequency of use of the main resource use elements during follow up (excluding initial diagnostic test)**

| Resource use (unit cost)                   | Angiography<br>(n=222) | SPECT<br>(n=224) | Cardiac MRI<br>(n=226) | Stress Echo<br>(n=226) |
|--------------------------------------------|------------------------|------------------|------------------------|------------------------|
| CABG (£7195)                               | 28                     | 33               | 28                     | 34                     |
| PCI (£3660)                                | 57                     | 46               | 60                     | 62                     |
| Other hospital admission<br>(£467 per day) | 36                     | 29               | 28                     | 53                     |
| Angiography (£951)                         | 12                     | 183              | 175                    | 181                    |
| SPECT (£902)                               | 16                     | 3                | 3                      | 6                      |
| Cardiac MRI (£307)                         | 5                      | 5                | 12                     | 5                      |
| Echocardiography (£59)                     | 30                     | 17               | 24                     | 18                     |
| PET scan (£842)                            | 0                      | 3                | 0                      | 1                      |
| Preadmission clinic (£85)                  | 22                     | 21               | 27                     | 24                     |
| Follow up clinic (£85)                     | 19                     | 22               | 31                     | 21                     |
| Outpatient visits (£143)                   | 247                    | 270              | 300                    | 284                    |
| Myocardial Infarctions                     | 3                      | 4                | 5                      | 10                     |

1  
2  
3 **Figure Legends**  
4  
5

6  
7 **Figure 1 CONSORT diagram describing recruitment and randomization**  
8  
9

10  
11 **Figure 2 Kaplan-Meier survival estimates according to initial modality of diagnosis**  
12  
13

14  
15 **Figure 3 Quality of life assessed by EQ5D over time**  
16  
17  
18  
19  
20  
21  
22  
23  
24  
25  
26  
27  
28  
29  
30  
31  
32  
33  
34  
35  
36  
37  
38  
39  
40  
41  
42  
43  
44  
45  
46  
47  
48  
49  
50  
51  
52  
53  
54  
55  
56  
57  
58  
59  
60

## References

1. NICE. Myocardial perfusion scintigraphy for the diagnosis and management of angina and myocardial infarction: National Institute for Clinical Excellence 2003; Technology Appraisal Guidance 73.
2. Boden WE. Surgery, angioplasty, or medical therapy for symptomatic multivessel coronary artery disease: is there an indisputable "winning strategy" from evidence-based clinical trials? *Journal of the American College of Cardiology*. 2004;43(10):1752-4. Epub 2004/05/18.
3. Coronary artery surgery study (CASS): a randomized trial of coronary artery bypass surgery. Quality of life in patients randomly assigned to treatment groups. *Circulation*. 1983;68(5):951-60. Epub 1983/11/01.
4. Boden WE, O'Rourke RA, Teo KK, Hartigan PM, Maron DJ, Kostuk WJ, et al. Optimal medical therapy with or without PCI for stable coronary disease. *The New England journal of medicine*. 2007;356(15):1503-16. Epub 2007/03/28.
5. Patel MR, Peterson ED, Dai D, Brennan JM, Redberg RF, Anderson HV, et al. Low diagnostic yield of elective coronary angiography. *The New England journal of medicine*. 2010;362(10):886-95. Epub 2010/03/12.
6. Gibbons RJ, Balady GJ, Bricker JT, Chaitman BR, Fletcher GF, Froelicher VF, et al. ACC/AHA 2002 guideline update for exercise testing: summary article. A report of the American College of Cardiology/American Heart Association Task Force on Practice Guidelines (Committee to Update the 1997 Exercise Testing Guidelines). *Journal of the American College of Cardiology*. 2002;40(8):1531-40. Epub 2002/10/24.
7. Douglas PS, Khandheria B, Stainback RF, Weissman NJ, Peterson ED, Hendel RC, et al. ACCF/ASE/ACEP/AHA/ASNC/SCAI/SCCT/SCMR 2008 appropriateness criteria for stress echocardiography: a report of the American College of Cardiology Foundation Appropriateness Criteria Task Force, American Society of Echocardiography, American College of Emergency Physicians, American Heart Association, American Society of Nuclear

1  
2  
3 Cardiology, Society for Cardiovascular Angiography and Interventions, Society of  
4 Cardiovascular Computed Tomography, and Society for Cardiovascular Magnetic  
5 Resonance endorsed by the Heart Rhythm Society and the Society of Critical Care  
6 Medicine. *Journal of the American College of Cardiology*. 2008;51(11):1127-47. Epub  
7 2008/03/18.

8  
9  
10  
11  
12  
13 8. Hendel RC, Berman DS, Di Carli MF, Heidenreich PA, Henkin RE, Pellikka PA, et al.  
14 ACCF/ASNC/ACR/AHA/ASE/SCCT/SCMR/SNM 2009 Appropriate Use Criteria for Cardiac  
15 Radionuclide Imaging: A Report of the American College of Cardiology Foundation  
16 Appropriate Use Criteria Task Force, the American Society of Nuclear Cardiology, the  
17 American College of Radiology, the American Heart Association, the American Society of  
18 Echocardiography, the Society of Cardiovascular Computed Tomography, the Society for  
19 Cardiovascular Magnetic Resonance, and the Society of Nuclear Medicine. *Journal of the*  
20 *American College of Cardiology*. 2009;53(23):2201-29. Epub 2009/06/06.

21  
22  
23  
24  
25  
26  
27  
28  
29  
30  
31 9. Hundley WG, Bluemke DA, Finn JP, Flamm SD, Fogel MA, Friedrich MG, et al.  
32 ACCF/ACR/AHA/NASCI/SCMR 2010 expert consensus document on cardiovascular  
33 magnetic resonance: a report of the American College of Cardiology Foundation Task Force  
34 on Expert Consensus Documents. *Circulation*. 2010;121(22):2462-508. Epub 2010/05/19.

35  
36  
37  
38  
39  
40  
41  
42  
43  
44  
45 10. Sharples L, Hughes V, Crean A, Dyer M, Buxton M, Goldsmith K, et al. Cost-  
46 effectiveness of functional cardiac testing in the diagnosis and management of coronary  
47 artery disease: a randomised controlled trial. The CECaT trial. *Health Technol Assess*.  
48 2007;11(49):iii-iv, ix-115. Epub 2007/11/21.

49  
50  
51  
52  
53  
54  
55  
56  
57  
58  
59  
60 11. Pryor DB, Shaw L, McCants CB, Lee KL, Mark DB, Harrell FE, Jr., et al. Value of the  
60 history and physical in identifying patients at increased risk for coronary artery disease.  
*Annals of internal medicine*. 1993;118(2):81-90. Epub 1993/01/15.

12. Seldinger SI. Catheter replacement of the needle in percutaneous arteriography; a  
new technique. *Acta radiologica*. 1953;39(5):368-76. Epub 1953/05/01.

13. Scanlon PJ, Faxon DP, Audet AM, Carabello B, Dehmer GJ, Eagle KA, et al.  
ACC/AHA guidelines for coronary angiography. A report of the American College of

1  
2  
3 Cardiology/American Heart Association Task Force on practice guidelines (Committee on  
4 Coronary Angiography). Developed in collaboration with the Society for Cardiac  
5 Angiography and Interventions. Journal of the American College of Cardiology.  
6  
7 1999;33(6):1756-824. Epub 1999/05/20.  
8  
9

10  
11 14. Wackers FJ. Exercise myocardial perfusion imaging. Journal of nuclear medicine :  
12 official publication, Society of Nuclear Medicine. 1994;35(4):726-9. Epub 1994/04/01.  
13

14  
15 15. Pennell DJ, Sechtem UP, Higgins CB, Manning WJ, Pohost GM, Rademakers FE, et  
16 al. Clinical indications for cardiovascular magnetic resonance (CMR): Consensus Panel  
17 report. Journal of cardiovascular magnetic resonance : official journal of the Society for  
18 Cardiovascular Magnetic Resonance. 2004;6(4):727-65. Epub 2005/01/14.  
19  
20

21  
22 16. Reeder SB, Atalar E, Faranesh AZ, McVeigh ER. Multi-echo segmented k-space  
23 imaging: an optimized hybrid sequence for ultrafast cardiac imaging. Magnetic resonance in  
24 medicine : official journal of the Society of Magnetic Resonance in Medicine / Society of  
25 Magnetic Resonance in Medicine. 1999;41(2):375-85. Epub 1999/03/18.  
26  
27

28  
29 17. Canet EP, Janier MF, Revel D. Magnetic resonance perfusion imaging in ischemic  
30 heart disease. Journal of magnetic resonance imaging : JMRI. 1999;10(3):423-33. Epub  
31 1999/10/03.  
32  
33

34  
35 18. Netten A CL. Unit costs of health and social care 2005. University of Kent: Public  
36 Social Services Research Unit (PSSRU), 2005.  
37  
38

39  
40 19. Kind P. The EuroQol instrument: an index of health-related quality of life. In: Spiker  
41 B, editor. Quality of life and pharmacoeconomics in clinical trials. Philadelphia, PA:  
42 Lippincott-Raven; 1996.  
43  
44

45  
46 20. Dolan P GC, Kind P. A social tariff for EuroQol: results from a UK general population  
47 survey 1995.  
48  
49

50  
51 21. Willan AR, Lin DY, Cook RJ, Chen EB. Using inverse-weighting in cost-effectiveness  
52 analysis with censored data. Statistical methods in medical research. 2002;11(6):539-51.  
53  
54  
55  
56 Epub 2003/01/09.  
57  
58  
59  
60



- 1  
2  
3 22. Efron B TR. An introduction to the bootstrap. San Francisco: Chapman and Hall;  
4  
5 1993.  
6  
7 23. Tonino PA, Fearon WF, De Bruyne B, Oldroyd KG, Leeser MA, Ver Lee PN, et al.  
8  
9 Angiographic versus functional severity of coronary artery stenoses in the FAME study  
10  
11 fractional flow reserve versus angiography in multivessel evaluation. Journal of the American  
12  
13 College of Cardiology. 2010;55(25):2816-21. Epub 2010/06/29.  
14  
15 24. Mozes B, Shabtai E. The appropriateness of performing coronary angiography in two  
16  
17 major teaching hospitals in Israel. International journal for quality in health care : journal of  
18  
19 the International Society for Quality in Health Care / ISQua. 1994;6(3):245-9. Epub  
20  
21 1994/09/01.  
22  
23 25. Gray D, Hampton JR. Methods of establishing criteria for purchasing coronary  
24  
25 angiography in the investigation of chest pain. Journal of public health medicine.  
26  
27 1994;16(4):399-405. Epub 1994/12/01.  
28  
29 26. Guadagnoli E, Hauptman PJ, Ayanian JZ, Pashos CL, McNeil BJ, Cleary PD.  
30  
31 Variation in the use of cardiac procedures after acute myocardial infarction. The New  
32  
33 England journal of medicine. 1995;333(9):573-8. Epub 1995/08/31.  
34  
35 27. Mark DB, Naylor CD, Hlatky MA, Califf RM, Topol EJ, Granger CB, et al. Use of  
36  
37 medical resources and quality of life after acute myocardial infarction in Canada and the  
38  
39 United States. The New England journal of medicine. 1994;331(17):1130-5. Epub  
40  
41 1994/10/27.  
42  
43 28. Rouleau JL, Moye LA, Pfeffer MA, Arnold JM, Bernstein V, Cuddy TE, et al. A  
44  
45 comparison of management patterns after acute myocardial infarction in Canada and the  
46  
47 United States. The SAVE investigators. The New England journal of medicine.  
48  
49 1993;328(11):779-84. Epub 1993/03/18.  
50  
51 29. Tu JV, Pashos CL, Naylor CD, Chen E, Normand SL, Newhouse JP, et al. Use of  
52  
53 cardiac procedures and outcomes in elderly patients with myocardial infarction in the United  
54  
55 States and Canada. The New England journal of medicine. 1997;336(21):1500-5. Epub  
56  
57 1997/05/22.  
58  
59  
60

- 1  
2  
3 30. Selby JV, Fireman BH, Lundstrom RJ, Swain BE, Truman AF, Wong CC, et al.  
4  
5 Variation among hospitals in coronary-angiography practices and outcomes after myocardial  
6  
7 infarction in a large health maintenance organization. *The New England journal of medicine*.  
8  
9 1996;335(25):1888-96. Epub 1996/12/19.
- 10  
11 31. Chan PS, Patel MR, Klein LW, Krone RJ, Dehmer GJ, Kennedy K, et al.  
12  
13 Appropriateness of percutaneous coronary intervention. *JAMA : the journal of the American*  
14  
15 *Medical Association*. 2011;306(1):53-61. Epub 2011/07/07.
- 16  
17 32. Pijls NH, Fearon WF, Tonino PA, Siebert U, Ikeno F, Bornschein B, et al. Fractional  
18  
19 flow reserve versus angiography for guiding percutaneous coronary intervention in patients  
20  
21 with multivessel coronary artery disease: 2-year follow-up of the FAME (Fractional Flow  
22  
23 Reserve Versus Angiography for Multivessel Evaluation) study. *Journal of the American*  
24  
25 *College of Cardiology*. 2010;56(3):177-84. Epub 2010/06/12.
- 26  
27 33. Griffin SC, Barber JA, Manca A, Sculpher MJ, Thompson SG, Buxton MJ, et al. Cost  
28  
29 effectiveness of clinically appropriate decisions on alternative treatments for angina pectoris:  
30  
31 prospective observational study. *BMJ*. 2007;334(7594):624. Epub 2007/03/07.
- 32  
33 34. Watkins S, McGeoch R, Lyne J, Steedman T, Good R, McLaughlin MJ, et al.  
34  
35 Validation of magnetic resonance myocardial perfusion imaging with fractional flow reserve  
36  
37 for the detection of significant coronary heart disease. *Circulation*. 2009;120(22):2207-13.  
38  
39 Epub 2009/11/18.
- 40  
41 35. Krittayaphong R, Chaithiraphan V, Manesai A, Udompanturak S. Prognostic value  
42  
43 of combined magnetic resonance myocardial perfusion imaging and late gadolinium  
44  
45 enhancement. *The international journal of cardiovascular imaging*. 2011;27(5):705-14. Epub  
46  
47 2011/04/12.
- 48  
49 36. Bingham SE, Hachamovitch R. Incremental prognostic significance of combined  
50  
51 cardiac magnetic resonance imaging, adenosine stress perfusion, delayed enhancement,  
52  
53 and left ventricular function over preimaging information for the prediction of adverse events.  
54  
55 *Circulation*. 2011;123(14):1509-18. Epub 2011/03/30.
- 56  
57  
58  
59  
60

- 1  
2  
3 37. Greenwood JP, Maredia N, Younger JF, Brown JM, Nixon J, Everett CC, et al.  
4  
5 Cardiovascular magnetic resonance and single-photon emission computed tomography for  
6  
7 diagnosis of coronary heart disease (CE-MARC): a prospective trial. *Lancet*.  
8  
9 2012;379(9814):453-60. Epub 2011/12/27.
- 10  
11 38. Greenwood JP. CMR versus SPECT for diagnosis of coronary heart disease –  
12  
13 Authors' reply *The Lancet*. 2012;379(9832):2147 - 8.
- 14  
15 39. Beanlands RS, Nichol G, Huszti E, Humen D, Racine N, Freeman M, et al. F-18-  
16  
17 fluorodeoxyglucose positron emission tomography imaging-assisted management of patients  
18  
19 with severe left ventricular dysfunction and suspected coronary disease: a randomized,  
20  
21 controlled trial (PARR-2). *Journal of the American College of Cardiology*. 2007;50(20):2002-  
22  
23 12. Epub 2007/11/13.
- 24  
25 40. Maron DJ, Stone GW, Berman DS, Mancini GB, Scott TA, Byrne DW, et al. Is cardiac  
26  
27 catheterization necessary before initial management of patients with stable ischemic heart  
28  
29 disease? Results from a Web-based survey of cardiologists. *American heart journal*.  
30  
31 2011;162(6):1034-43 e13. Epub 2011/12/06.
- 32  
33 41. Nallamothu BK, Rogers MA, Chernew ME, Krumholz HM, Eagle KA, Birkmeyer JD.  
34  
35 Opening of specialty cardiac hospitals and use of coronary revascularization in medicare  
36  
37 beneficiaries. *JAMA : the journal of the American Medical Association*. 2007;297(9):962-8.  
38  
39 Epub 2007/03/08.
- 40  
41 42. Feit F, Mueller HS, Braunwald E, Ross R, Hodges M, Herman MV, et al.  
42  
43 Thrombolysis in Myocardial Infarction (TIMI) phase II trial: outcome comparison of a  
44  
45 "conservative strategy" in community versus tertiary hospitals. The TIMI Research Group.  
46  
47 *Journal of the American College of Cardiology*. 1990;16(7):1529-34. Epub 1990/12/01.
- 48  
49 43. Blustein J. High-technology cardiac procedures. The impact of service availability on  
50  
51 service use in New York State. *JAMA : the journal of the American Medical Association*.  
52  
53 1993;270(3):344-9. Epub 1993/07/21.
- 54  
55 44. Every NR, Larson EB, Litwin PE, Maynard C, Fihn SD, Eisenberg MS, et al. The  
56  
57 association between on-site cardiac catheterization facilities and the use of coronary  
58  
59  
60

1  
2  
3 angiography after acute myocardial infarction. Myocardial Infarction Triage and Intervention  
4 Project Investigators. The New England journal of medicine. 1993;329(8):546-51. Epub  
5 1993/08/19.

6  
7  
8  
9 45. Shaw LJ, Hachamovitch R, Berman DS, Marwick TH, Lauer MS, Heller GV, et al.  
10 The economic consequences of available diagnostic and prognostic strategies for the  
11 evaluation of stable angina patients: an observational assessment of the value of  
12 precatheterization ischemia. Economics of Noninvasive Diagnosis (END) Multicenter Study  
13 Group. Journal of the American College of Cardiology. 1999;33(3):661-9. Epub 1999/03/18.

14  
15  
16  
17 46. Mowatt G, Vale L, Brazzelli M, Hernandez R, Murray A, Scott N, et al. Systematic  
18 review of the effectiveness and cost-effectiveness, and economic evaluation, of myocardial  
19 perfusion scintigraphy for the diagnosis and management of angina and myocardial  
20 infarction. Health Technol Assess. 2004;8(30):iii-iv, 1-207. Epub 2004/07/14.

21  
22  
23  
24 47. Underwood SR, Godman B, Salyani S, Ogle JR, Ell PJ. Economics of myocardial  
25 perfusion imaging in Europe--the EMPIRE Study. European heart journal. 1999;20(2):157-  
26 66. Epub 1999/04/01.

27  
28  
29  
30 48. Underwood SR, Shaw LJ, Anagnostopoulos C, Cerqueira M, Ell PJ, Flint J, et al.  
31 Myocardial perfusion scintigraphy and cost effectiveness of diagnosis and management of  
32 coronary heart disease. Heart. 2004;90 Suppl 5:v34-6. Epub 2004/07/16.

33  
34  
35  
36 49. Uchida T, Popma J, Stone GW, Ellis SG, Turco MA, Ormiston JA, et al. The clinical  
37 impact of routine angiographic follow-up in randomized trials of drug-eluting stents: a critical  
38 assessment of "oculostenotic" reintervention in patients with intermediate lesions. JACC  
39 Cardiovascular interventions. 2010;3(4):403-11. Epub 2010/04/20.

40  
41  
42  
43 50. Christou MA, Siontis GC, Katritsis DG, Ioannidis JP. Meta-analysis of fractional flow  
44 reserve versus quantitative coronary angiography and noninvasive imaging for evaluation of  
45 myocardial ischemia. The American journal of cardiology. 2007;99(4):450-6. Epub  
46 2007/02/13.

47  
48  
49  
50 51. Gould KL. Does coronary flow trump coronary anatomy? JACC Cardiovascular  
51 imaging. 2009;2(8):1009-23. Epub 2009/08/15.

- 1  
2  
3 52. Chang SM, Nabi F, Xu J, Raza U, Mahmarian JJ. Normal stress-only versus  
4 standard stress/rest myocardial perfusion imaging: similar patient mortality with reduced  
5 radiation exposure. *Journal of the American College of Cardiology*. 2010;55(3):221-30. Epub  
6 2009/11/17.  
7  
8  
9  
10  
11 53. Kuntz KM, Fleischmann KE, Hunink MG, Douglas PS. Cost-effectiveness of  
12 diagnostic strategies for patients with chest pain. *Annals of internal medicine*.  
13 1999;130(9):709-18. Epub 1999/06/05.  
14  
15  
16  
17 54. Hayashino Y, Nagata-Kobayashi S, Morimoto T, Maeda K, Shimbo T, Fukui T. Cost-  
18 effectiveness of screening for coronary artery disease in asymptomatic patients with Type 2  
19 diabetes and additional atherogenic risk factors. *Journal of general internal medicine*.  
20 2004;19(12):1181-91. Epub 2004/12/22.  
21  
22  
23  
24  
25 55. Tan SS, Oppe M, Zoet-Nugteren SK, Niezen RA, Kofflard MJ, Ten Cate FJ, et al. A  
26 microcosting study of diagnostic tests for the detection of coronary artery disease in The  
27 Netherlands. *European journal of radiology*. 2009;72(1):98-103. Epub 2008/08/16.  
28  
29  
30  
31 56. Kim C, Kwok YS, Saha S, Redberg RF. Diagnosis of suspected coronary artery  
32 disease in women: a cost-effectiveness analysis. *American heart journal*. 1999;137(6):1019-  
33 27. Epub 1999/05/29.  
34  
35  
36  
37 57. Lewandowski M, Szwed H, Kowalik I. Searching for the optimal strategy for the  
38 diagnosis of stable coronary artery disease. Cost-effectiveness of the new algorithm.  
39 *Cardiology journal*. 2007;14(6):544-51. Epub 2008/07/25.  
40  
41  
42  
43  
44  
45  
46  
47  
48  
49  
50  
51  
52  
53  
54  
55  
56  
57  
58  
59  
60

1  
2  
3  
4  
5  
6  
7  
8  
9  
10  
11  
12  
13  
14  
15  
16  
17  
18  
19  
20  
21  
22  
23  
24  
25  
26  
27  
28  
29  
30  
31  
32  
33  
34  
35  
36  
37  
38  
39  
40  
41  
42  
43  
44  
45  
46  
47  
48  
49  
50  
51  
52  
53  
54  
55  
56  
57  
58  
59  
60

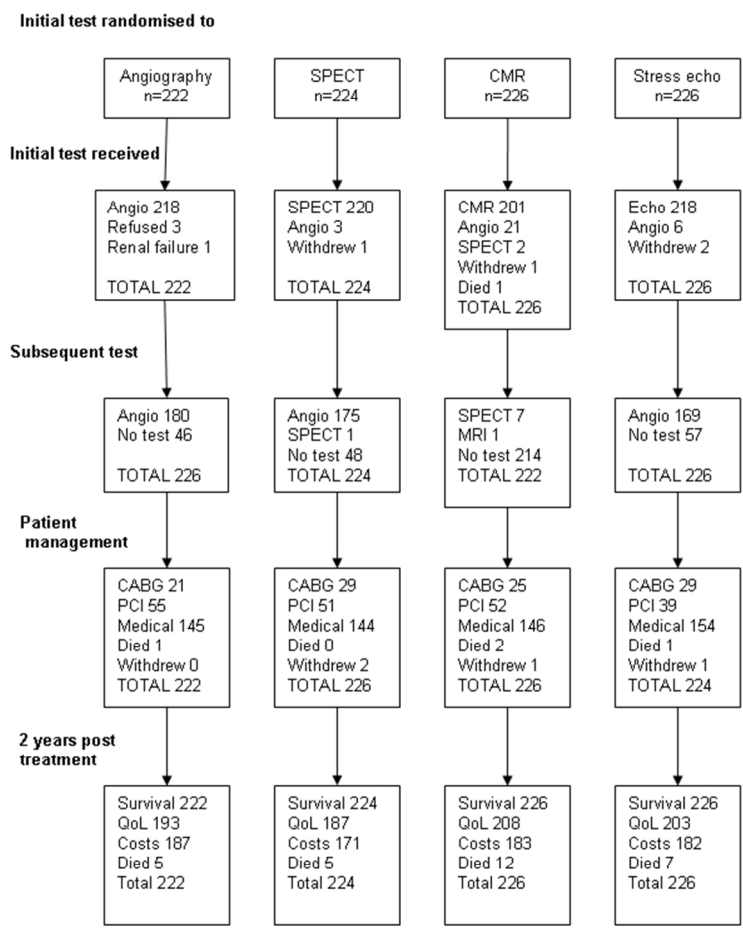

CONSORT diagram describing trial recruitment and randomisation  
190x254mm (96 x 96 DPI)

1  
2  
3  
4  
5  
6  
7  
8  
9  
10  
11  
12  
13  
14  
15  
16  
17  
18  
19  
20  
21  
22  
23  
24  
25  
26  
27  
28  
29  
30  
31  
32  
33  
34  
35  
36  
37  
38  
39  
40  
41  
42  
43  
44  
45  
46  
47  
48  
49  
50  
51  
52  
53  
54  
55  
56  
57  
58  
59  
60

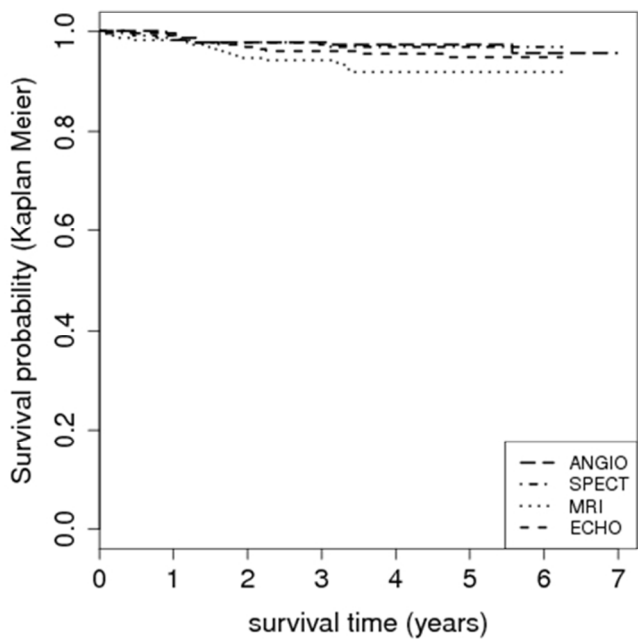

Kaplan-Meier survival estimates according to initial modality of diagnosis  
254x190mm (96 x 96 DPI)

Review only

1  
2  
3  
4  
5  
6  
7  
8  
9  
10  
11  
12  
13  
14  
15  
16  
17  
18  
19  
20  
21  
22  
23  
24  
25  
26  
27  
28  
29  
30  
31  
32  
33  
34  
35  
36  
37  
38  
39  
40  
41  
42  
43  
44  
45  
46  
47  
48  
49  
50  
51  
52  
53  
54  
55  
56  
57  
58  
59  
60

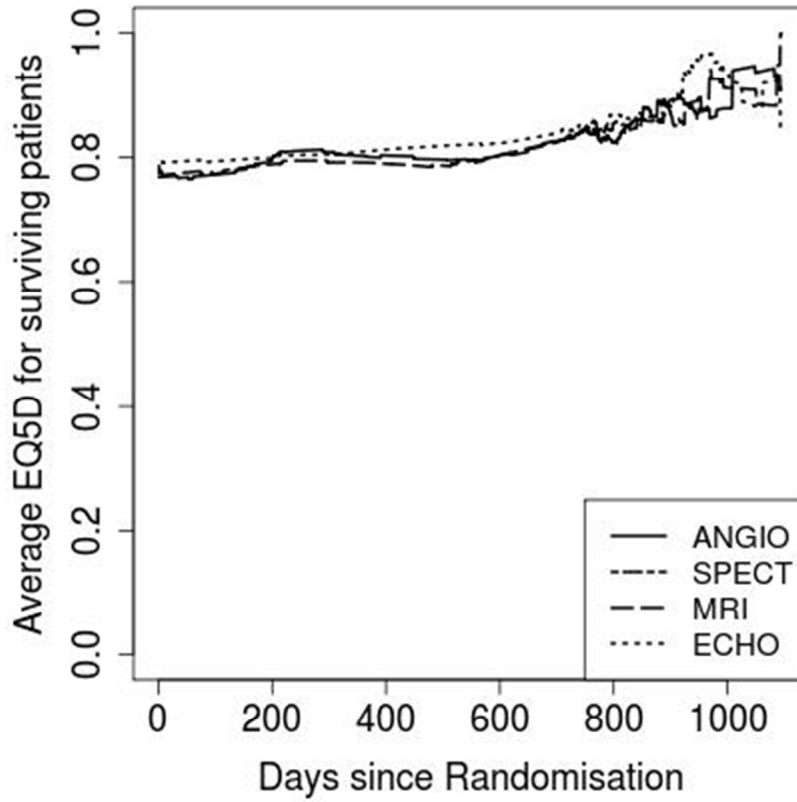

169x169mm (72 x 72 DPI)

only





**Cost effectiveness of initial stress cardiovascular MR, stress SPECT or stress echocardiography as a gatekeeper test, compared to upfront invasive coronary angiography in the investigation and management of patients with stable chest pain: mid term outcomes from the CECaT\* randomised controlled trial**

|                                 |                                                                                                                                                                                                                                                                                                                                                                                                                                                                                                      |
|---------------------------------|------------------------------------------------------------------------------------------------------------------------------------------------------------------------------------------------------------------------------------------------------------------------------------------------------------------------------------------------------------------------------------------------------------------------------------------------------------------------------------------------------|
| Journal:                        | <i>BMJ Open</i>                                                                                                                                                                                                                                                                                                                                                                                                                                                                                      |
| Manuscript ID:                  | bmjopen-2013-003419.R1                                                                                                                                                                                                                                                                                                                                                                                                                                                                               |
| Article Type:                   | Research                                                                                                                                                                                                                                                                                                                                                                                                                                                                                             |
| Date Submitted by the Author:   | 20-Oct-2013                                                                                                                                                                                                                                                                                                                                                                                                                                                                                          |
| Complete List of Authors:       | Thom, Howard; Institute of Public Health, Biostatistics West, Nicholas; Papworth Hospital, Cardiology<br>Hughes, Vikki; Papworth Hospital, Research & Development<br>Dyer, Matthew; Brunel University, Health Economics Research Group<br>Buxton, Martin; Brunel University, Health Economics Research Group<br>Sharples, Linda; Institute of Public Health, Biostatistics<br>Jackson, Christopher; Institute of Public Health, Biostatistics<br>Crean, Andrew; Toronto General Hospital, Cardiology |
| <b>Primary Subject Heading</b>: | Cardiovascular medicine                                                                                                                                                                                                                                                                                                                                                                                                                                                                              |
| Secondary Subject Heading:      | Health economics, Health policy, Health services research, Medical management, Radiology and imaging                                                                                                                                                                                                                                                                                                                                                                                                 |
| Keywords:                       | Adult cardiology < CARDIOLOGY, Ischaemic heart disease < CARDIOLOGY, Health economics < HEALTH SERVICES ADMINISTRATION & MANAGEMENT, Health policy < HEALTH SERVICES ADMINISTRATION & MANAGEMENT, Cardiology < INTERNAL MEDICINE, Cardiovascular imaging < RADIOLOGY & IMAGING                                                                                                                                                                                                                       |
|                                 |                                                                                                                                                                                                                                                                                                                                                                                                                                                                                                      |

SCHOLARONE™  
Manuscripts

1  
2  
3  
4 1 **Title: Cost effectiveness of initial stress cardiovascular MR, stress SPECT or stress**  
5  
6 2 **echocardiography as a gatekeeper test, compared to upfront invasive coronary**  
7  
8 3 **angiography in the investigation and management of patients with stable chest**  
9  
10 4 **pain: mid term outcomes from the CECaT\* randomised controlled trial**  
11

12  
13 5  
14 6 \*Cost Effectiveness of non-invasive Cardiac Testing  
15 7  
16 8

17 9 Howard Thom MSc, Nicholas West MD, FRCP, Vikki Hughes PhD, Matthew Dyer  
18  
19 10 MSc, Martin Buxton MSc, Linda D Sharples PhD, Christopher H Jackson PhD,  
20  
21 11 Andrew M Crean MRCP, FRCR  
22  
23  
24

25 13 **Affiliations:**

26 14 MRC Biostatistics Unit, Institute of Public Health, Cambridge CB2 0SR, UK, Howard Thom,  
27  
28 15 biostatistician; Department of Cardiology, Papworth Hospital, Cambridge, CB23 3RE, UK  
29  
30 16 Nicholas West, consultant cardiologist; Research and Development Office, Papworth  
31  
32 17 Hospital, Cambridge, CB23 3RE , UK ,Vikki Hughes senior research analyst; Health  
33  
34 18 Economics Research Group, Brunel University, Uxbridge, Middlesex UB8 3PH, UK, Matthew  
35  
36 19 Dyer, research fellow; Health Economics Research Group, Brunel University, Uxbridge,  
37  
38 20 Middlesex UB8 3PH, UK, Martin Buxton, professor; MRC Biostatistics Unit, Institute of Public  
39  
40 21 Health, Cambridge CB2 0SR, UK, Linda D Sharples, statistician; MRC Biostatistics Unit,  
41  
42 22 Institute of Public Health, Cambridge CB2 0SR, UK, Christopher H Jackson, senior  
43  
44 23 statistician; Division of Cardiology, Toronto General Hospital, Toronto, M5G 2C4, Canada,  
45  
46 24 Andrew M Crean, assistant professor of medicine & radiology.  
47  
48  
49

50 26 **Corresponding author:** Dr Andrew Crean MRCP FRCR, Division of Cardiology, Toronto  
51  
52 27 General Hospital, 585 University Avenue, Toronto, ON, Canada M5G 2C4  
53

54 28 **Tel:** 1 416 340 4800 **Fax:** 1 888 502 6601 **Email:** [andrew.crean@uhn.ca](mailto:andrew.crean@uhn.ca)  
55

56 29 **Clinical Trial registration:** ISRCTN 47108462, UKCRN 3696  
57  
58  
59  
60

1  
2  
3 30 **The CECaT study group were:**  
4

5 31 Johanna Armstrong, Martin Buxton, Noreen Caine, Richard Coulden, Andrew Crean,  
6

7 32 Matthew Dyer, Margaret Gillham, Hester Goddard, Kim Goldsmith, Vikki Hughes, Evelyn  
8

9 33 Lee, Roger Patel, Peter Schofield, Linda Sharples, Emer Sonnex, David Stone, Carmen  
10

11 34 Treacy  
12

13 35 **Key words:** MRI, cardiovascular magnetic resonance, comparative effectiveness, SPECT,  
14

15 36 stress echo, coronary angiography  
16

17 37 **Trial registration:** ISRCTN 47108462, UKCRN 3696  
18

19 38  
20

21 39  
22

23 40  
24

25 41  
26

27 42  
28

29 43  
30

31 44  
32

33 45  
34

35 46  
36

37 47  
38

39 48  
40

41 49  
42

43 50  
44

45 51  
46

47 52  
48

49 53  
50

51 54  
52

53 55  
54

55 56  
56

57 57  
58

59 60  
60

1  
2  
3 58 **Abstract**

4  
5 59 **Objectives:** to compare outcomes and cost effectiveness of various initial imaging strategies on  
6  
7 60 the management of stable chest pain in a long term prospective randomized trial.

8  
9 61 **Setting:** regional cardiothoracic referral center in the east of England

10  
11 62 **Participants:** 898 patients (69% male) entered the study with 869 alive at 2yr follow up.  
12  
13 63 Patients were included if they presented for assessment of stable chest pain with a positive  
14  
15 64 exercise test and no prior history of ischemic heart disease. Exclusion criteria were recent  
16  
17 65 infarction, unstable symptoms or any contra-indication to stress MRI.

18  
19 66 **Primary outcome measures:** The primary outcomes of this follow up study were survival up  
20  
21 67 to a minimum of 2 years post-treatment, quality-adjusted survival and cost-utility of each  
22  
23 68 strategy

24  
25 69 **Results:** 898 patients were randomized. Compared to angiography, mortality was  
26  
27 70 marginally higher in the groups randomized to CMR (hazard ratio 2.6, 95%CI 1.1, 6.2), but  
28  
29 71 similar in the SPECT-MIBI (hazard ratio 1.0, 95%CI 0.4, 2.9) and ECHO groups (hazard ratio  
30  
31 72 1.6, 95%CI 0.6, 4.0). Although SPECT-MIBI was marginally superior to other non-invasive  
32  
33 73 tests there were no other significant differences between the groups in mortality, quality  
34  
35 74 adjusted survival or costs.

36  
37 75 **Conclusions:** Non-invasive cardiac imaging can be used safely as the initial diagnostic test  
38  
39 76 to diagnose CAD without adverse effects on patient outcomes or increased costs, relative to  
40  
41 77 angiography. These results should be interpreted in the context of recent advances in  
42  
43 78 imaging technology.

44  
45 79

46  
47 80

48  
49 81

50  
51 82

52  
53 83

54  
55 84

56  
57 85

58  
59 86

60  
61 87

1  
2  
3 86 **Article summary:**

4  
5 87 **Article focus:**

- 6  
7 88 1. Is non-invasive imaging a safe and appropriate gate-keeper to coronary  
8  
9 89 angiography in patients with stable chest pain ?
- 10  
11 90 2. Is there any difference in cost-effectiveness and cost-utility between the  
12  
13 91 different non-invasive approaches and conventional coronary angiography
- 14  
15 92 3. Are patients disadvantaged in any meaningful way by having a non-invasive  
16  
17 93 test to decide whether they should go forward for coronary angiography ?
- 18  
19 94 4. How does stress perfusion CMR compare to the more established tests of  
20  
21 95 SPECT-MIBI and stress echocardiography as a gate-keeper to coronary  
22  
23 96 angiography ?

24  
25 97  
26  
27 98 **Key messages:**

- 28  
29 99 1. Non-invasive testing may be used safely as a gate-keeper to coronary  
30  
31 100 angiography in patients with stable chest pain without any material  
32  
33 101 disadvantage to them in terms of survival and quality of life up to 6 years after  
34  
35 102 initial randomisation.
- 36  
37 103 2. SPECT-MIBI appears marginally superior statistically to the other non-invasive  
38  
39 104 methods although clinically meaningful differences are small between all  
40  
41 105 strategies.
- 42  
43 106 3. Stress perfusion CMR appears to be an effective technique in a stable out-  
44  
45 107 patient population with undiagnosed chest pain.

46  
47 108  
48  
49 109 **Strengths and limitations:**

- 50  
51 110 1. This is the only large randomised prospective trial of a strategy of non-invasive  
52  
53 111 gate-keeper cardiac imaging versus upfront angiography in the literature.
- 54  
55 112 2. The cost-utility data are derived from NHS tariffs and our results are not  
56  
57 113 necessarily directly transferrable to other healthcare systems

## 114 Introduction

115

116 CAD is common and its management is costly<sup>(1)</sup>. Revascularisation using bypass surgery  
117 (CABG) or percutaneous coronary intervention (PCI) is effective for patients with severe  
118 disease<sup>(2)</sup> but a significant minority of patients do not gain symptomatic relief<sup>(3)</sup>. Data from  
119 the COURAGE trial did not show prognostic benefit from revascularization in any patient  
120 subgroup<sup>(4)</sup>. The yield of coronary angiography is variable with one recent large study of  
121 nearly 400, 000 patients demonstrating a normalcy rate approaching 40%<sup>(5)</sup>. Therefore  
122 non-invasive testing to identify those with a low likelihood of obstructive CAD may be safer,  
123 cheaper and more appropriate than upfront angiography. This approach is codified in  
124 multiple AHA/ACC guidelines on the investigation of stable or suspected angina pectoris in  
125 which initial non-invasive imaging is rated as highly appropriate<sup>(6) (7) (8) (9)</sup>.

126

127 The 'Cost-Effectiveness of non-invasive Cardiac Testing' (CECaT) trial was an unblinded  
128 non-inferiority trial designed to assess three functional tests - stress echocardiography,  
129 single photon emission computed tomography (SPECT) and stress cardiac magnetic  
130 resonance imaging (CMR) - as a gatekeeper to coronary angiography (CA) in patients  
131 referred for CA with suspected coronary artery disease (CAD). Early clinical and cost-  
132 effectiveness estimates have been published and showed that the CMR group had slightly  
133 lower mean exercise treadmill time according to the Bruce protocol but otherwise the tests  
134 could be considered equally effective<sup>(10)</sup>. This report provides the main cost-effectiveness  
135 and mortality outcomes up to 6 years after randomisation.

136

## 137 Methods

### 138 Study design

139 The design of the study has been described elsewhere<sup>(10)</sup> and is reviewed briefly here. All  
140 patients referred to Papworth Hospital, UK for non-urgent angiography were eligible for the  
141 study. Inclusion criteria were: established or suspected chronic stable angina and a positive

1  
2  
3 142 exercise tolerance test result with subsequent referral for angiography. Exclusion criteria  
4  
5 143 were: recent MI (<3 months), revascularisation (<6 months); urgent need for  
6  
7 144 revascularisation; contra-indication to adenosine or CMR; inability to exercise.  
8

9 145

10  
11 146 Trial design was of four parallel arms with a 1:1:1:1 randomisation ratio. Randomisation was  
12  
13 147 computer generated and stratified according to Pryor risk assessment<sup>(11)</sup>. Within each Pryor  
14  
15 148 risk group, randomisation was in blocks of length 6 or 8. Sequentially numbered group  
16  
17 149 designation was held in the Research & Development (R&D) Office and was not available to  
18  
19 150 trial personnel. Patients were randomised to their initial diagnostic test - stress SPECT,  
20  
21 151 stress CMR, stress echocardiography, or angiography - by R&D within 4 weeks of  
22  
23 152 recruitment and only after they had given consent and been registered.  
24

25 153

26  
27 154 Non invasive imaging results were returned with a recommendation to proceed with  
28  
29 155 angiography only when reported as 'positive' for inducible ischemia. Protocol adherence to  
30  
31 156 this recommendation was not mandated by trial design and patients proceeded to  
32  
33 157 angiography if considered clinically indicated. Treatment with PCI or CABG (performed  
34  
35 158 within six months of angiography) or to medical therapy was according to standard practice.  
36

37 159

### 38 160 **Coronary angiography.**

39  
40  
41 161 Standard diagnostic angiography was performed from the right femoral artery approach<sup>(12)</sup>.  
42  
43 162 A minimum of 5 views of the left and 3 views of the right coronary system were taken<sup>(13)</sup>. All  
44  
45 163 examinations were reported by an experienced staff cardiologist and segmental location of  
46  
47 164 disease (if any) recorded.  
48

49 165

### 50 166 **Stress echocardiography**

51  
52  
53 167 Beta-blocker medications were stopped 2 days beforehand. Dobutamine was infused at  
54  
55 168 rates of 10- 40 mcg/kg/min, increased at 3 minute intervals. If necessary, 300-600  
56  
57 169 micrograms of atropine were added at peak stress to achieve 90% of target heart  
58  
59  
60

1  
2  
3 170 rate. Images were acquired in standard planes in the final minute of each 3 minute stage.  
4  
5 171 Intravenous microspheres were used to delineate the endocardial surface. All examinations  
6  
7 172 were reported by one of two staff cardiologists experienced in stress echocardiography.  
8  
9 173 Studies were positive for ischemia if stress-induced deterioration in contractility was  
10  
11 174 observed.

175

**176 SPECT**

177 Rest/stress 99mTc sestamibi (99mTc MIBI) SPECT was performed (2 day protocol). A 6  
178 minute adenosine infusion (140 µg/kg/min) was employed. 400 MBq 99m-Tc MIBI was  
179 administered at 3 minutes after infusion of adenosine was started. Gated SPECT imaging  
180 occurred 60 minutes after injection. Tomographic images were assessed for fixed and  
181 reversible defects by a single observer (as per established criteria)<sup>(14)</sup>.

182

**183 CMR**

184 Stress CMR imaging was performed at a standard similar to that which was subsequently  
185 recommended by the Society of Cardiovascular Magnetic Resonance <sup>(15)</sup>. A 1.5T mobile  
186 CMR system and 4-channel phased array surface coil were used (Signa CV/i, GE Medical  
187 Systems). Stress/rest dynamic first-pass perfusion imaging was performed. A hybrid fast  
188 gradient echo/echoplanar sequence was employed <sup>(16)</sup>. Adenosine was infused at 140  
189 mcg/kg/min for 4 minutes. After 3 minutes, a bolus of Gadolinium-DTPA (0.1mmol/kg) was  
190 delivered at 5mls/sec, followed by a 25ml saline flush. First-pass imaging of the heart  
191 occurred over 80 heart beats. A volumetric notched-saturation pre-pulse preserved a  
192 constant saturation-recovery time during slice acquisition <sup>(17)</sup>. 6-8 short axis slices were  
193 obtained every 2 heart beats. Rest imaging was repeated after a minimum interval of 15  
194 minutes. Cine steady state free precession images and late gadolinium enhancement  
195 images were also acquired as described in the original CECaT protocol <sup>(10)</sup> Studies were  
196 reported as positive if there was an inducible perfusion defect visible for at least 5 frames



1  
2  
3 197 either: a) in a region of normal wall thickness; or b) in a region of myocardial thinning in the  
4  
5 198 absence of a history of prior myocardial infarction.  
6

7 199

## 8 9 200 **Outcomes**

10  
11 201 The primary outcome in the original CECaT trial was exercise treadmill time at 18 months  
12  
13 202 post-randomisation using the modified Bruce protocol, in which exercise intensity was  
14  
15 203 increased every 3 minutes. There was a range of secondary outcomes including diagnostic  
16  
17 204 accuracy, clinical events, health-related quality and cost-effectiveness of life up to 18 months  
18  
19 205 after randomisation<sup>(10)</sup>.

20  
21 206 The primary outcomes of this follow up study were survival up to a minimum of 2 years post-  
22  
23 207 treatment, quality-adjusted survival and cost-utility of each strategy. Survival status at the  
24  
25 208 end of follow up was determined from the Office for National Statistics database, UK  
26  
27 209 (<http://www.ons.gov.uk/>).

28  
29 210 Quality of life was measured using the EuroQoL EQ-5D questionnaire<sup>(18)</sup> which was  
30  
31 211 completed at baseline, 6 and 18 months post-randomisation, and at 6, 18 and 24 months  
32  
33 212 post-treatment. The social tariff for the EQ-5D was applied in order to calculate utility values  
34  
35 213<sup>(19)</sup>. Because post-treatment measurements were at variable times post-randomisation  
36  
37 214 (randomisation date is time zero for a randomised trial) daily utilities were estimated using  
38  
39 215 linear interpolation.  
40

41 216

## 42 43 217 **Sample size calculations**

44  
45 218 The sample size of 898 patients was based on exercise performance and was calculated  
46  
47 219 according to the methodology published in the initial report of the CECaT study<sup>(10)</sup>.

48  
49 220

## 50 51 221 **Statistical and economic analysis**

52  
53 222 For this study, survival was summarised using Kaplan-Meier estimates and the groups were  
54  
55 223 compared using Cox proportional hazards regression. This assumes that the instantaneous  
56  
57 224 risk of death (hazard) for a reference value of a covariate will vary through time, but that the  
58  
59  
60

1  
2  
3 225 hazards for other values of the covariate will be a constant multiple of this baseline hazard,  
4  
5 226 and this multiple will not vary through time. This assumption was tested using Schoenfeld  
6  
7 227 residuals and there was little evidence against it. The diagnostic test was entered into the  
8  
9 228 Cox regression as a 4-level fixed covariate, with angiography as the reference category. In  
10  
11 229 sensitivity analysis CABG and PCI were included in the regression analyses as time-varying  
12  
13 230 covariates, taking a value 0 up to the time of intervention and 1 thereafter, to ensure that any  
14  
15 231 differences between the groups was not due to differences in treatment. Inclusion of  
16  
17 232 treatment (CABG/PCI) did not affect comparison of diagnostic strategies and results of these  
18  
19 233 analyses are not included here.  
20  
21 234  
22  
23 235 Patient-specific hospital resource use was collected for 2 years post-treatment with  
24  
25 236 revascularisation or medical management. Costs were based on National Health Service  
26  
27 237 reference costs 2005/06 prices. An annual discount rate of 3.5% was applied to all costs and  
28  
29 238 quality-adjusted life-years (QALYs) after 12 months post-randomisation. Resources costed  
30  
31 239 were: imaging tests; revascularisation; inpatient/outpatient episodes; adverse events;  
32  
33 240 cardiac-related medications. Patient-reported admissions for MI were verified with the  
34  
35 241 admitting hospital and adjudicated.  
36  
37 242  
38  
39 243 Quality adjusted survival and cost estimates were censored at the last follow up at 2 years  
40  
41 244 after treatment, resulting in varying duration of follow-up from the time of randomisation to  
42  
43 245 the different diagnostic strategies, so that mean values over a range of time horizons were  
44  
45 246 estimated using inverse weighting methods<sup>(20)</sup>. This method allows for differing follow up  
46  
47 247 times between patients by splitting follow up time into intervals, and up-weighting the  
48  
49 248 observed quality adjusted survival and costs in an interval in proportion to the inverse of the  
50  
51 249 Kaplan-Meier estimate of the proportion observed during the interval. In the base case we  
52  
53 250 used a time horizon of 3 years since it was the longest period over which results were stable,  
54  
55 251 with acceptable precision. Confidence intervals for costs and QALYs were estimated using  
56  
57 252 bootstrapping with 5000 samples<sup>(21)</sup>.  
58  
59  
60

1  
2  
3 253 **Sensitivity analysis**

4  
5 254 Sensitivity of cost-utility results for different time horizons was assessed by re-estimating  
6  
7 255 results up to 12, 18, 24, 36 and 48 months after randomization. In addition, cardiologists  
8  
9 256 were divided into those who did and did not perform percutaneous coronary intervention as  
10  
11 257 part of their routine clinical practice, and results were recalculated for each subgroup. With  
12  
13 258 the exception of this *post-hoc* data interrogation, all other results presented derive from  
14  
15 259 intention-to-treat analysis.  
16

17 260

18  
19 261 The study had IRB approval and full written informed consent was obtained from all  
20  
21 262 participants. All authors had full access to the data and take responsibility for the manuscript  
22  
23 263 as written.  
24

25 264

26  
27 265 **Results**

28  
29 266 **Recruitment and compliance**

30  
31 267 Between September 2001 and September 2004, 3,201 patients were assessed, 1,981 were  
32  
33 268 excluded and 322 refused entry to the trial. Refusals were more likely to come from women  
34  
35 269 (46% compared with 31% enrolled into the study,  $p<0.001$ ) and were significantly older  
36  
37 270 (mean age 64.6, (SD 10.1) compared with study group mean age 61.8, (9.4),  $p<0.001$ ).  
38

39 271

40  
41 272 898 patients were randomised. Groups were well matched at baseline (table 1). In each  
42  
43 273 group 69% of patients were high risk for CAD (Pryor score  $> 0.8$ ). The trial was closed to  
44  
45 274 recruitment in September 2004 after enrolling the pre-specified number of subjects.  
46

47 275

48  
49 276 One-hundred-seventy-five (78%) SPECT patients, 180 (80%) CMR patients and 169 (75%)  
50  
51 277 stress echo patients were referred on for angiography (**Figure 1**). Between 20% and 25% of  
52  
53 278 patients undergoing non-invasive tests did not require further investigation. Twenty-one  
54  
55 279 percent of patients who had negative tests were referred for angiography and the proportion  
56  
57 280 was similar in each group (SPECT  $n=45$ , CMR  $n=50$ , ECHO  $n=48$ ,  $p=0.858$ ). Of these 14  
58  
59  
60

1  
2  
3 281 (31%) SPECT, 26 (52%) CMR and 23 (48%) ECHO resulted in a positive angiogram  
4  
5 282 (p=0.130). Four patients died and four withdrew from the trial early on. Of the remaining  
6  
7 283 patients, revascularization was required in 34% (301/890 – see **Figure 1** for numbers in  
8  
9 284 each arm). There was no significant difference between the groups in initial patient  
10  
11 285 management (Figure 1, p=0.527). Beyond the initial management strategy 42 subsequent  
12  
13 286 revascularisation procedures were required in the angiography arm compared with 30 in the  
14  
15 287 SPECT, 44 in the CMR and 41 in the ECHO arms. The median times between  
16  
17 288 randomisation and initial revascularisation were 122 days in the angiography group, 192  
18  
19 289 days for SPECT, 184 days for CMR and 177.5 days for ECHO, resulting in a delay due to  
20  
21 290 functional testing of approximately 2 months.  
22

291

### 292 **Survival**

293 During the study there were 7 (3%), 7 (3%), 18 (8%) and 11 (5%) deaths in the angiography  
294 , SPECT, CMR and ECHO groups respectively. Kaplan-Meier survival curves for the 4  
295 groups are plotted in **Figure 2**. Survival in the SPECT (hazard ratio 1.0, 95%CI 0.4, 2.9) and  
296 stress echo (hazard ratio 1.6, 95%CI 0.6, 4.0) groups were not significantly different from  
297 angiography but the CMR group had higher mortality, with hazard ratio 2.6 (95%CI 1.1 to  
298 6.2), p=0.032 (**Table 2**). The significant effect of CMR on survival remained when CABG or  
299 PCI were included in the models. However, mortality was low in all groups and the absolute  
300 mean difference in survival was less than 1 month over 3 years (**Table 2**). Mean survival  
301 estimates over 3 years with 95% confidence intervals are shown in **Table 2**.

302 All patients had complete adverse event data up to 18 months post-randomisation during  
303 which there were 178 non-fatal adverse events in 114 patients, mostly hospital admissions  
304 for chest pain (**Table 3**). Beyond this time only adverse events that resulted in admissions  
305 were recorded as they were relevant for the economic analysis. No patient suffered any  
306 adverse event at the time of the initial randomised imaging test.

307

### 308 **Cost-utility**

1  
2  
3 309 **Table 4** shows some of the highest incurred follow up costs for the 4 groups and shows that  
4  
5 310 patient management varied substantially between individuals. Although angiography was the  
6  
7 311 most expensive of the four initial diagnostic tests, the strategy of initial angiography had  
8  
9 312 lower mean overall cost than stress echo, and was similar to CMR up to 3 years (**Table 2**).  
10  
11 313 Extra costs for patients in the three non-invasive groups was largely due to patients  
12  
13 314 undergoing follow-on angiography. There were no significant differences in overall costs  
14  
15 315 between the groups.  
16

17 316  
18  
19 317 During the study there were no significant differences in EQ-5D between the groups. **Figure**  
20  
21 318 **3** shows daily mean EQ-5D utility over time based on interpolation between measurements  
22  
23 319 for survivors who completed the EQ-5D. Using inverse-weighting we calculated QALYs over  
24  
25 320 different time horizons and these are presented up to 3 years in Table 2. Mean QALYs over  
26  
27 321 3 years in the angiography group was 2.24, which was not significantly different from the  
28  
29 322 other groups. **Figure 4** shows the joint distribution of the difference in mean cost against the  
30  
31 323 difference in mean QALY for each diagnostic strategy group and angiography alone, and  
32  
33 324 shows the uncertainty in these estimates. **Figure 5** shows the Cost-Effectiveness  
34  
35 325 Acceptability Curve and demonstrated that SPECT has a high chance (>70%) of being cost-  
36  
37 326 effective whatever the willingness-to-pay threshold is but for CMR and ECHO there is much  
38  
39 327 less certainty about this decision. The mean differences between groups were close to zero  
40  
41 328 in all 3 cases so that the cost-per-QALY estimates are unstable and a cost-minimization  
42  
43 329 approach may be more appropriate. This would favour SPECT, which was both cheaper and  
44  
45 330 more effective on average than angiography, and had the lowest overall cost (Table 2).  
46

47 331

### 48 332 **Sensitivity analysis**

49  
50 333 The comparisons between the diagnostic strategy groups did not change substantially when  
51  
52 334 we varied the time horizon; the main effect of this was that the variation surrounding  
53  
54 335 estimates increased as the time horizon lengthened due to the heavy censoring (results not  
55  
56 336 shown). **Tables 2a and 2b** show results for interventional and non-invasive cardiologists  
57  
58  
59  
60

1  
2  
3 337 respectively. Patients who were managed by interventional cardiologists incurred higher  
4  
5 338 costs due to the greater number of tests and revascularization procedures performed, with  
6  
7 339 minimal incremental benefit in QALY.  
8

9 340

## 10 341 **Discussion**

11  
12  
13 342 CECaT is the first completed prospective randomized trial to look at the clinical and cost-  
14  
15 343 effectiveness of non-invasive imaging in the diagnosis and management of angina. To the  
16  
17 344 best of the authors' knowledge there has been no comparable outcomes trial published on  
18  
19 345 this scale evaluating three independent non-invasive 'gatekeeper' modalities versus initial  
20  
21 346 angiography in stable chest pain. The trial is also unusual in the length of prospective follow  
22  
23 347 up extending to 6 years for mortality outcomes.  
24

25 348

26  
27 349 We have demonstrated that use of any one of stress CMR, stress echo or stress SPECT as  
28  
29 350 the initial test for a stable chest pain patient leads to non-inferior outcomes in quality of life  
30  
31 351 and cost utility compared to patients randomised to upfront invasive coronary angiography.  
32  
33 352 Typically, non invasive tests perform well in low risk populations because of a negative  
34  
35 353 predictive value which is usually better than the positive predictive value. However, the  
36  
37 354 patient risk profile was relatively high in our study, and despite this there was no significant  
38  
39 355 difference between an initial functional or anatomic approach.  
40

41 356

42  
43 357 There are several reasons why initial angiography may not have led to clear benefit in our  
44  
45 358 study. Firstly, although angiography has stood at the heart of the diagnostic chest pain  
46  
47 359 pathway, the traditional binary cut-off values of 50% or 70% percentage stenosis by visual  
48  
49 360 estimation were shown in the FAME study to bear little relation to the true physiologic  
50  
51 361 significance of luminal narrowing <sup>(22)</sup>.  
52

53 362

54  
55  
56 363 Secondly, data from various countries suggest that not only is coronary angiography often  
57  
58 364 inappropriate when formally rated by expert observers <sup>(23) (24)</sup> but that disparate national or  
59  
60

1  
2  
3 365 regional rates of angiography do not translate into clear mortality benefits between countries  
4  
5 366 <sup>(25) (26) (27) (28)</sup> and on occasion may even demonstrate an inverse relationship <sup>(29)</sup>.

6  
7 367 Contemporary US data from approximately 500,000 PCI procedures collected prospectively  
8  
9 368 in the National Cardiovascular Data Registry demonstrated that, of 145,000 elective PCI  
10  
11 369 cases, roughly 12% were judged inappropriate. Furthermore, the rate of inappropriate  
12  
13 370 elective PCI between hospital sites ranged from 0-55% suggesting significant variability in  
14  
15 371 practice <sup>(30)</sup>. The data suggest a better way of selecting patients for invasive investigation is  
16  
17 372 needed.  
18  
19 373

20  
21 374 Ischemia-driven revascularisation has been shown to be of benefit in a number of trials,  
22  
23 375 most recently in the FAME study in which an invasive method of measuring the flow reserve  
24  
25 376 of the microcirculation (Fractional Flow Reserve, FFR) was used to allocate patients to  
26  
27 377 intervention or observation vs a clinical decision on intervention based on angiography alone  
28  
29 378 <sup>(31)</sup>. At 2 years follow up there were clear survival and MACE benefits to the FFR-based  
30  
31 379 approach.  
32  
33

34 380  
35 381 The ACRE study reported that, up to 6 years after diagnosis, medical management was a  
36  
37 382 more cost-effective strategy for angina compared with PCI <sup>(32)</sup>. The lack of evidence for  
38  
39 383 survival from revascularisation was also seen in the COURAGE trial <sup>(4)</sup>. Critics have  
40  
41 384 suggested this may be because randomization to PCI versus optimal medical therapy was  
42  
43 385 made *after* coronary angiography had been performed, potentially leading to a recruitment  
44  
45 386 bias of patients with less severe disease. In the CECaT trial this bias was avoided by  
46  
47 387 randomization to a management strategy defined by the non-invasive test result for each of  
48  
49 388 the 3 functional arms of the trial. In a relatively high risk population, we demonstrated no  
50  
51 389 clinically significant survival or economic detriment from using non-invasive imaging as a  
52  
53 390 gate-keeper to catheterization. Similarly, quality of life was not significantly different across  
54  
55 391 all four groups and these differences extended to a warranty period of at least 3 years.  
56  
57 392



1  
2  
3 393 We did observe a marginal decrease in survival in the CMR arm. The reasons for the  
4  
5 394 difference are unclear but do not relate to patient characteristics or management with CABG  
6  
7 395 or PCI. Although statistically significant, the mean survival difference from the other groups  
8  
9 396 was only 4 weeks over 3 years and is unlikely to be clinically meaningful. Since recent work  
10  
11 397 has established a strong correspondence between FFR measurements and stress CMR  
12  
13 398 perfusion indices it would be surprising if CMR were genuinely inferior to other modalities for  
14  
15 399 risk stratification<sup>(33)</sup>. Indeed several recent publications have highlighted the incremental  
16  
17 400 prognostic data (above that obtained from clinical variables) derived from several thousand  
18  
19 401 perfusion CMR studies<sup>(34)(35)</sup>.

20  
21 402  
22  
23 403 Given the recent publication of the CEMARC trial<sup>(36)</sup> in which a clear diagnostic superiority  
24  
25 404 was demonstrated for stress CMR over SPECT, it is interesting that our data nonetheless  
26  
27 405 show an equivalence in functional health status between those randomized to SPECT  
28  
29 406 versus CMR in the CECaT trial. The implication may be that although CMR detects the  
30  
31 407 presence of *any* ischemia with a greater sensitivity it is the *overall burden* of ischemia that  
32  
33 408 alters a patient's prognosis. As such, it has not yet been demonstrated that the higher  
34  
35 409 diagnostic accuracy of CMR translates into better long-term patient outcomes – a fact  
36  
37 410 acknowledged by Greenwood et al subsequent to CEMARC's publication<sup>(37)</sup>. In this context  
38  
39 411 the CECaT nuclear results are congruent with numerous past publications and reconfirm the  
40  
41 412 reassuring warranty period of a normal SPECT study.

42  
43  
44 413

#### 45 414 **Cost effectiveness**

46  
47 415 There was no significant difference in cost-effectiveness between the angiography -as-  
48  
49 416 default group and the non-invasive test groups up to 3 years, perhaps relating to the higher-  
50  
51 417 than-anticipated rate of referral for angiography after negative functional tests. Protocol  
52  
53 418 deviation of this kind is not infrequent in trials of non-invasive technology. In the recent  
54  
55 419 PARR-2 study of patients undergoing fluorodeoxyglucose positron emission tomography for  
56  
57 420 the assessment of viability, roughly 25 % of the study population did not adhere to protocol  
58  
59  
60



1  
2  
3 421 <sup>(38)</sup>. The willingness of a cardiologist to defer referral for coronary angiography in the face of  
4  
5 422 a normal non-invasive study may in part reflect individual prejudices and job description  
6  
7 423 (interventional versus non-invasive) as demonstrated in a recent survey of cardiology  
8  
9 424 attitudes <sup>(39)</sup> and was also reflected in our own data.  
10

11 425

12  
13 426 In CECaT, 20-25% of patients receiving a non-invasive test did not go on to have  
14  
15 427 angiography. A proportion of the additional cost in the non-invasive arms related to  
16  
17 428 angiography and PCI in the patients with a *negative* test, although only very few  
18  
19 429 subsequently required CABG - a robust marker of significant disease - during follow-up. This  
20  
21 430 readiness to employ PCI in a group in whom the indication/benefit is debatable was also  
22  
23 431 seen in the ACRE trial <sup>(32)</sup> and reflects understandable clinical response to uncertainty but  
24  
25 432 also the easy access to PCI in healthcare systems without barriers to self-referral <sup>(40)</sup>.  
26

27 433 Similarly, studies from the US have demonstrated a greater willingness to use coronary  
28  
29 434 angiography when available 'on site' as is increasingly seen even in small-to-medium sized  
30  
31 435 hospitals <sup>(41) (42) (43)</sup>.  
32

33 436

### 35 437 ***Cost effectiveness of each non-invasive technique***

36 438

37  
38  
39 439 Nuclear myocardial perfusion imaging  
40

41 440

42  
43 441 The END study used propensity matching to compare a large cohort of patients referred for  
44  
45 442 either gate-keeper myocardial perfusion imaging or upfront angiography – this non  
46  
47 443 randomised study demonstrated a significant cost reduction in the (44) nuclear arm. In  
48  
49 444 contrast to this and other work <sup>(45) (46) (47)</sup> we were unable to show a significant difference in  
50  
51 445 cost effectiveness in our own study. To some extent this reflected the participating physician  
52  
53 446 bias towards angiography during the period of trial recruitment (2001-2006) with many  
54  
55 447 patients referred for angiography despite normal perfusion studies. This continues in the  
56  
57 448 contemporary era with Chan et al demonstrating that almost 80% of Delphi-adjudicated  
58  
59  
60

1  
2  
3 449 inappropriate elective PCIs were performed following either low risk ischemia imaging in  
4  
5 450 mildly symptomatic patients or intermediate risk imaging in entirely asymptomatic patients  
6  
7 451 <sup>(30)</sup>.

8  
9 452

10  
11 453 In the CECaT study, when PCI was performed despite a negative initial non-invasive test,  
12  
13 454 this occurred because subsequent angiography indicated 'significant' stenosis. This was a  
14  
15 455 clinical judgment based on 'eyeball assessment' of lesion severity as has been reported in  
16  
17 456 clinical trials with angiographic end points <sup>(48)</sup>. However, the severity and functional  
18  
19 457 significance of many stenoses may be over-called, even by quantitative assessment, when  
20  
21 458 compared with physiological assessment of fractional flow reserve across the lesion <sup>(49) (50)</sup>.

22  
23 459 Further improvement in cost-effectiveness could likely have been achieved in the nuclear  
24  
25 460 arm of the trial. Our post-trial practice is to perform the stress SPECT first - and if this is  
26  
27 461 negative - cancel the rest test, likely augmenting the relative cost-effectiveness of SPECT  
28  
29 462 <sup>(51)</sup>.

30  
31 463

32  
33 464 CMR

34  
35 465 There are relatively few data available regarding the cost effectiveness of CMR . One recent  
36  
37 466 mathematical modelling study estimated that CMR likely has greater cost effectiveness/utility  
38  
39 467 compared to SPECT despite greater base case cost of the former <sup>(52)</sup> . The economic  
40  
41 468 superiority of CMR was also recently described by the CEMARC group, although  
42  
43 469 interestingly the base case costs employed for CMR and SPECT in their analysis differed by  
44  
45 470 only a few pounds. Their own sensitivity analysis in fact demonstrated that if the costs of the  
46  
47 471 two tests varied by more than 100 pounds (which was the case in our study) then in fact – as  
48  
49 472 we found - SPECT became the dominant strategy in a low-to-intermediate risk population.

50  
51 473 <sup>(53)</sup>

52  
53 474

54  
55 475 Stress echo

1  
2  
3 476 Stress echocardiography may be a more cost-effective strategy than angiography for men  
4  
5 477 aged 50-60 with CAD prevalence of 50%<sup>(54), (47)</sup>. There is also some evidence that stress  
6  
7 478 echo is more cost-effective than SPECT as an initial test<sup>(55) (56)</sup>, especially in women with  
8  
9 479 suspected CAD<sup>(57)</sup>. A similar benefit was not seen in our study probably because of the high  
10  
11 480 disease prevalence in our population. The lack of superiority of either stress  
12  
13 481 echocardiography or a combined strategy of exercise testing and stress echo compared to  
14  
15 482 upfront catheterisation was also evident in a recent Polish study of 600 patients with a  
16  
17 483 similar age, gender and disease prevalence to our own study population<sup>(58)</sup>.  
18  
19 484

20  
21 485 Taken overall, our data clearly demonstrate a limited future role for cost-effective non-  
22  
23 486 invasive imaging if referring physicians are not willing to accept a negative result as ground  
24  
25 487 truth. This might be interpreted as reflecting a need for greater physician education since we  
26  
27 488 showed a clear difference in onward referral rates for angiography after a negative test  
28  
29 489 between interventional and non-invasive cardiologists.  
30  
31 490

### 32 33 491 ***Clinical effectiveness***

34  
35 492 We demonstrated that SPECT can obviate the need for coronary angiography for a  
36  
37 493 significant number of patients without any clinical detriment. In the stress echo group clinical  
38  
39 494 outcomes were also comparable to the angiography subgroup at 18 months. The CMR  
40  
41 495 group had statistically marginally poorer survival and this follows our earlier finding that CMR  
42  
43 496 patients had significantly worse exercise tolerance at 18 months after randomisation<sup>(10)</sup>. This  
44  
45 497 is difficult to explain on the basis of Pryor risk score or other baseline clinical variables.  
46  
47 498 However, the mean difference in survival between the CMR arm and the other groups was  
48  
49 499 only 4 weeks and thus of marginal clinical significance. More importantly, the CMR group  
50  
51 500 were not otherwise disadvantaged – compared to the angiographic control group - with  
52  
53 501 respect to major adverse events, other resource use, or quality of life.  
54  
55 502

56  
57  
58 503  
59  
60

1  
2  
3 504 **Limitations**

4  
5 505 This study was carried out in a single specialist cardiothoracic centre with a significant  
6  
7 506 proportion of high risk, predominantly white European, male patients. Those eligible who  
8  
9 507 refused the trial were older and were more likely to be women.

10  
11 508

12  
13 509 Survival data from the national registry did not include cause of death so that deaths due to  
14  
15 510 cardiovascular causes could not be reported separately.

16  
17 511

18  
19 512 The trial completed recruitment in 2004 and we used the technology that was available to us  
20  
21 513 at the onset of the trial. At that time, we were not able to use attenuation correction for  
22  
23 514 SPECT imaging; however this was also not used in the much more recent CEMARC trial<sup>(36)</sup>.  
24  
25 515 Similarly, we performed our CMR exams in a mobile facility on a 1.5T scanner with only  
26  
27 516 modest coil technology and limited temporal and anatomic coverage that would compare  
28  
29 517 unfavourably with the 3T whole heart high resolution perfusion studies available today.

30  
31 518

32  
33 519 The trial aimed to reflect the strategy of using non-invasive imaging as a gateway to  
34  
35 520 angiography in *contemporary clinical practice*. The test results were considered in  
36  
37 521 conjunction with other information available at the time. Thus it was not the aim to formally  
38  
39 522 assess diagnostic accuracy of the non-invasive tests in this context. This trial-based study  
40  
41 523 was limited to 3 year cost-effectiveness follow up - longer-term economic models would  
42  
43 524 provide lifetime estimates of the cost-effectiveness of the non-invasive strategies and could  
44  
45 525 include advances in imaging technology.

46  
47 526

48  
49 527 **Conclusions**

50  
51 528 We have demonstrated in the CECaT trial that stress echo, stress CMR and stress SPECT  
52  
53 529 may each be used to defer invasive coronary angiography without clinical detriment or  
54  
55 530 significant excess costs in an outpatient population with stable chest pain.

56  
57 531  
58  
59  
60

532 **Table 1 Baseline characteristics\***

|                                                             | Angiography<br>(n=222) | SPECT<br>(n=224) | Cardiac MRI<br>(n=226) | Stress Echo<br>(n=226) |
|-------------------------------------------------------------|------------------------|------------------|------------------------|------------------------|
| <b>Demographics</b>                                         |                        |                  |                        |                        |
| Mean (SD) age (years)                                       | 60.7 (9.1)             | 62.1 (9.5)       | 62.2 (9.0)             | 61.9 (9.9)             |
| Males (%)                                                   | 149 (67%)              | 157 (70%)        | 153 (68%)              | 160 (71%)              |
| <b>History/risk factors</b>                                 |                        |                  |                        |                        |
| Previous MI (%)                                             | 63 (28%)               | 52 (23%)         | 69 (31%)               | 59 (26%)               |
| Previous CVA (%)                                            | 10 (5%)                | 13 (6%)          | 8 (4%)                 | 12 (5%)                |
| <b>Diabetes(%)</b>                                          |                        |                  |                        |                        |
| IDDM                                                        | 12 (5%)                | 8 (4%)           | 11 (5%)                | 5 (2%)                 |
| NIDDM                                                       | 16 (7%)                | 18 (8%)          | 21 (9%)                | 22 (10%)               |
| Family history CAD                                          | 60 (27%)               | 55 (25%)         | 63 (28%)               | 59 (26%)               |
| <b>Smoking history (%)</b>                                  |                        |                  |                        |                        |
| <25 pack years                                              | 149 (67%)              | 162 (72%)        | 148 (65%)              | 155 (69%)              |
| ≥25 pack years                                              | 73 (33%)               | 62 (28%)         | 78 (35%)               | 71 (31%)               |
| Treated hyperlipidaemia                                     | 164 (74%)              | 171 (76%)        | 179 (79%)              | 179 (79%)              |
| (%)                                                         |                        |                  |                        |                        |
| Treated hypertension (%)                                    | 117 (53%)              | 132 (59%)        | 115 (51%)              | 129 (57%)              |
| <b>Exercise tolerance using the modified Bruce protocol</b> |                        |                  |                        |                        |
| Mean (SD) total exercise<br>time (mins)                     | 11.29 (4.56)           | 10.46 (4.41)     | 10.43 (4.43)           | 10.89 (4.36)           |
| <b>ECG changes on exercise test</b>                         |                        |                  |                        |                        |
| 1-2 mm ST depression<br>with symptoms                       | 53 (24%)               | 43 (19%)         | 54 (24%)               | 57 (25%)               |
| ≥ 2mm ST depression<br>without symptoms                     | 16 (7%)                | 24 (11%)         | 20 (9%)                | 24 (11%)               |

|                           |           |           |           |           |
|---------------------------|-----------|-----------|-----------|-----------|
| ST elevation**/ no change | 153 (69%) | 157 (70%) | 152 (67%) | 145 (64%) |
| CCS class                 |           |           |           |           |
| 0-I                       | 60 (27%)  | 54 (24%)  | 78 (35%)  | 58 (26%)  |
| II                        | 138 (62%) | 144 (64%) | 122 (54%) | 132 (58%) |
| III-IV                    | 24 (11%)  | 26 (12%)  | 26 (11%)  | 36 (16%)  |

533 \* There were no significant differences between the groups in any variable

534 \*\* ST elevation was observed in 3 angiography, 2 CMR and 1 ECHO patients.

535 **Table 2 Cost-effectiveness summaries to 3 years post randomization**

536

|                                                | Angiography<br>(n=222) | SPECT<br>(n=224) | Cardiac MRI<br>(n=226) | Stress Echo<br>(n=226) |
|------------------------------------------------|------------------------|------------------|------------------------|------------------------|
| Hazard ratio for death                         | Baseline               | 0.99             | 2.60                   | 1.42                   |
| (95%CI)                                        |                        | (0.35,2.85)      | (1.09,6.22)            | (0.54,3.74)            |
| Mean survival (years)                          | 2.96                   | 2.95             | 2.90                   | 2.94                   |
| (95%CI)                                        | (2.92, 2.99)           | (2.90, 2.99)     | (2.83, 2.95)           | (2.89, 2.97)           |
| Mean difference vs. CA                         | -                      | -0.01            | -0.06                  | -0.02                  |
| (95%CI)                                        | -                      | (-0.07,0.05)     | (-0.14, 0.01)          | (-0.08, 0.04)          |
| Mean QALYs                                     | 2.24                   | 2.27             | 2.18                   | 2.27                   |
| (95%CI)                                        | (2.16,2.30)            | (2.20,2.33)      | (2.11,2.25)            | (2.20,2.33)            |
| Mean difference vs. CA                         | -                      | 0.03             | -0.05                  | 0.03                   |
| (95%CI)                                        | -                      | (-5.30,1.20)     | (-4.50,2.01)           | (-3.08,3.95)           |
| Mean discounted costs (£)                      | 5322                   | 4989             | 5249                   | 5865                   |
| (95%CI)                                        | (4343,6526)            | (4514,5466)      | (4737,5756)            | (5181, 6634)           |
| Mean difference vs. CA                         | -                      | -333             | -73                    | 544                    |
| (95%CI)                                        | -                      | (-1613,760)      | (-1379, 1040)          | (-809, 1791)           |
| Probability cost effective<br>at £20k per QALY | -                      | 0.75             | 0.24                   | 0.49                   |
| Probability cost effective<br>at £30k per QALY | -                      | 0.74             | 0.22                   | 0.55                   |

537

538 **Table 2a Cost-effectiveness summaries for patients managed by interventional**  
 539 **cardiologists to 3 years post randomization**  
 540

|                                                | Angiography<br>(n=73) | SPECT<br>(n=96)  | Cardiac MRI<br>(n=93) | Stress Echo<br>(n=98) |
|------------------------------------------------|-----------------------|------------------|-----------------------|-----------------------|
| Mean survival (years)                          | 2.96                  | 2.97             | 2.89                  | 2.96                  |
| (95%CI)                                        | (2.91, 2.98)          | (2.93, 3.00)     | (2.80, 2.97)          | (2.90, 2.98)          |
| Mean difference vs. CA                         | -                     | 0.01             | -0.07                 | 0                     |
| (95%CI)                                        | -                     | (-0.05,0.07)     | (-0.17, 0.02)         | (-0.07,0.05)          |
| Mean QALYs                                     | 2.25                  | 2.29             | 2.21                  | 2.2                   |
| (95%CI)                                        | (2.14,2.36)           | (2.19,2.38)      | (2.10,2.32)           | (2.09,2.29)           |
| Mean difference vs. CA                         | -                     | 0.03             | -0.04                 | -0.06                 |
| (95%CI)                                        | -                     | (-5.48,2.06)     | (-5.22,2.21)          | (-3.11,6.17)          |
| Mean discounted costs (£)                      | 5810                  | 5610             | 5656                  | 6733                  |
| (95%CI)                                        | (4733, 7033)          | (4872, 6381)     | (4947, 6389)          | (5530, 8140)          |
| Mean difference vs. CA                         | -                     | -200             | -154                  | 923                   |
| (95%CI)                                        | -                     | (-1620,<br>1160) | (-1568,<br>1165)      | (-770, 2712)          |
| Probability cost effective<br>at £20k per QALY |                       | 0.67             | 0.37                  | 0.19                  |
| Probability cost effective<br>at £30k per QALY |                       | 0.66             | 0.35                  | 0.21                  |



541 **Table 2b Cost-effectiveness summaries for patients managed by non-interventional**  
 542 **cardiologists to 3 years post randomization**

543

|                                                | Angiography<br>(n=149) | SPECT<br>(n=128) | Cardiac MRI<br>(n=133) | Stress Echo<br>(n=128) |
|------------------------------------------------|------------------------|------------------|------------------------|------------------------|
| Mean survival (years)                          | 2.95                   | 2.93             | 2.9                    | 2.92                   |
| (95%CI)                                        | (2.89, 2.99)           | (2.85, 2.98)     | (2.81, 2.97)           | (2.85, 2.98)           |
| Mean difference vs. CA                         | -                      | -0.02            | -0.05                  | -0.03                  |
| (95%CI)                                        | -                      | (-0.11,0.06)     | (-0.15, 0.04)          | (-0.11, 0.05)          |
| Mean QALYs                                     | 2.23                   | 2.25             | 2.17                   | 2.32                   |
| (95%CI)                                        | (2.14,2.31)            | (2.16,2.33)      | (2.07,2.26)            | (2.23,2.41)            |
| Mean difference vs. CA                         | -                      | 0.02             | -0.06                  | 0.09                   |
| (95%CI)                                        | -                      | (-7.32,1.90)     | (-5.98,3.37)           | (-5.84,3.39)           |
| Mean discounted costs (£)                      | 5015                   | 4521             | 5009                   | 5077                   |
| (95%CI)                                        | (3749, 6728)           | (3931, 5132)     | (4358, 5702)           | (4398, 5767)           |
| Mean difference vs. CA                         | -                      | -494             | -6                     | -62                    |
| (95%CI)                                        |                        | (-2317, 956)     | (-1831, 1492)          | (-1774, 1568)          |
| Probability cost effective<br>at £20k per QALY |                        | 0.70             | 0.25                   | 0.82                   |
| Probability cost effective<br>at £30k per QALY |                        | 0.69             | 0.24                   | 0.85                   |

544

545

546 **Table 3 Summary adverse events during initial 18 months follow up\***

| Adverse event                             | Angiography<br>(n=222) | SPECT<br>(n=224) | Cardiac MRI<br>(n=226) | Stress Echo<br>(n=226) |
|-------------------------------------------|------------------------|------------------|------------------------|------------------------|
| Total adverse events                      | 38                     | 34               | 44                     | 62                     |
| Chest pain (not<br>myocardial infarction) | 21                     | 20               | 28                     | 35                     |
| Angina                                    | 7                      | 5                | 4                      | 3                      |
| Myocardial infarction                     | 2                      | 0                | 3                      | 6                      |

547 \* Note that beyond this time only events that required hospital admission were recorded.

548

549

550 **Table 4** Summary of the frequency of use of the main resource use elements during follow up  
 551 of up to 3 years (excluding initial diagnostic test)

552

| Resource use (unit cost)                   | Angiography<br>(n=222) | SPECT<br>(n=224) | Cardiac MRI<br>(n=226) | Stress Echo<br>(n=226) |
|--------------------------------------------|------------------------|------------------|------------------------|------------------------|
| CABG (£7195)                               | 28                     | 33               | 28                     | 34                     |
| PCI (£3660)                                | 57                     | 46               | 60                     | 62                     |
| Other hospital admission<br>(£467 per day) | 36                     | 29               | 28                     | 53                     |
| Angiography (£1032)                        | 12                     | 183              | 175                    | 181                    |
| SPECT (£983)                               | 16                     | 3                | 3                      | 6                      |
| Cardiac MRI (£388)                         | 5                      | 5                | 12                     | 5                      |
| Echocardiography (£435)                    | 30                     | 17               | 24                     | 18                     |
| PET scan (£842)                            | 0                      | 3                | 0                      | 1                      |
| Preadmission clinic (£85)                  | 22                     | 21               | 27                     | 24                     |
| Follow up clinic (£85)                     | 19                     | 22               | 31                     | 21                     |
| Outpatient visits (£143)                   | 247                    | 270              | 300                    | 284                    |

553

554 \* Cardiac drugs were also included but are not shown here due to many different  
 555 combinations of drugs and doses prescribed.

556

557

1  
2  
3  
4  
5  
6  
7  
8  
9  
10  
11  
12  
13  
14  
15  
16  
17  
18  
19  
20  
21  
22  
23  
24  
25  
26  
27  
28  
29  
30  
31  
32  
33  
34  
35  
36  
37  
38  
39  
40  
41  
42  
43  
44  
45  
46  
47  
48  
49  
50  
51  
52  
53  
54  
55  
56  
57  
58  
59  
60

558 **Figure Legends**

559

560 **Figure 1 CONSORT diagram describing recruitment and randomization**

561

562 **Figure 2 Kaplan-Meier survival estimates according to initial modality of diagnosis**

563

564 **Figure 3 Quality of life assessed by EQ5D over time**

565

566 **Figure 4 Bootstrapped estimates of the joint distribution of mean cost difference**

567 **against mean QALY difference up to 3-years post randomisation**

568

569 **Figure 5 Estimated probability of being cost-effective compared with angiography**

570 **alone against the amount (£) a health provider is willing to pay for one additional**

571 **QALY**

572

573

574

575

576

577

578

579

580

581

582

583

584

585

1  
2  
3 586 **Acknowledgements**  
4

5 587

6  
7 588 The original CECaT study was funded by a grant from the UK National Health Service R&D  
8  
9 589 Health Technology Assessment Program (project no. 99/26/04). HT, CJ and LDS were  
10  
11 590 supported by the Medical Research Council [Programme number U015232027].  
12

13 591

14  
15 592 **Competing interests**  
16

17 593

18  
19 594 All authors have completed the ICMJE uniform disclosure form at  
20  
21 595 [http://www.icmje.org/coi\\_disclosure.pdf](http://www.icmje.org/coi_disclosure.pdf) and declare: support from the UK National Health  
22  
23 596 Service R&D Health Technology Assessment Program (project no. 99/26/04) and the UK  
24  
25 597 Medical Research Council [Programme number U015232027] for the submitted work ; no  
26  
27 598 financial relationships with any organisations that might have an interest in the submitted  
28  
29 599 work in the previous three years; no other relationships or activities that could appear to  
30  
31 600 have influenced the submitted work  
32

33 601

34  
35 602 **Exclusive licence statement**  
36

37 603

38  
39 604 The Corresponding Author has the right to grant on behalf of all authors and does grant on  
40  
41 605 behalf of all authors, an exclusive licence (or non exclusive for government employees) on a  
42  
43 606 worldwide basis to the BMJ Publishing Group Ltd and its Licensees to permit this article (if  
44  
45 607 accepted) to be published in BMJ editions and any other BMJ PGL products and sublicences  
46  
47 608 to exploit all subsidiary rights, as set out in our licence  
48  
49 609 (<http://resources.bmj.com/bmj/authors/checklists-forms/licence-for-publication>).  
50

51 610

52  
53 611  
54

55 612

56  
57 613  
58  
59  
60

1  
2  
3 614 **Contributorship statement**  
4

5 615  
6

7 616 HT performed literature review, data analysis and interpretation; NW was involved in image  
8  
9 617 analysis, drafting the manuscript and critical revision; VH was involved in recruiting the  
10  
11 618 patients, data management, administering health questionnaires, data analysis and drafting  
12  
13 619 the manuscript; MD and MB were responsible for data analysis, health economic  
14  
15 620 assessment, drafting the manuscript and critical revision; LDS was responsible for study  
16  
17 621 design, trial management, statistical analysis, drafting the manuscript and critical revision;  
18  
19 622 CJ performed statistical and health economic analysis, drafting the manuscript and critical  
20  
21 623 revision; AMC was involved in study design, patient recruitment, image interpretation, trial  
22  
23 624 management, drafting the manuscript and critical revision and is the overall guarantor of  
24  
25 625 manuscript integrity.  
26

27 626  
28

29 627 All authors have read the manuscript in its submitted form and have provided final approval  
30  
31 628 for publication.  
32

33 629  
34

35 630 ***Data sharing statement:***  
36

37 631  
38

39 632 There are no additional data available  
40

41 633  
42

43 634 ***Funding Statement***  
44

45 635  
46

47 636 *This work was supported by* Health Technology Assessment division of NIHR  
48

49 637  
50  
51  
52  
53  
54  
55  
56  
57  
58  
59  
60

638 **References**

639

- 640 1. NICE. Myocardial perfusion scintigraphy for the diagnosis and management of  
641 angina and myocardial infarction: National Institute for Clinical Excellence 2003; Technology  
642 Appraisal Guidance 73.
- 643 2. Boden WE. Surgery, angioplasty, or medical therapy for symptomatic multivessel  
644 coronary artery disease: is there an indisputable "winning strategy" from evidence-based  
645 clinical trials? *Journal of the American College of Cardiology*. 2004;43(10):1752-4. Epub  
646 2004/05/18.
- 647 3. Coronary artery surgery study (CASS): a randomized trial of coronary artery bypass  
648 surgery. Quality of life in patients randomly assigned to treatment groups. *Circulation*.  
649 1983;68(5):951-60. Epub 1983/11/01.
- 650 4. Boden WE, O'Rourke RA, Teo KK, Hartigan PM, Maron DJ, Kostuk WJ, et al.  
651 Optimal medical therapy with or without PCI for stable coronary disease. *The New England*  
652 *journal of medicine*. 2007;356(15):1503-16. Epub 2007/03/28.
- 653 5. Patel MR, Peterson ED, Dai D, Brennan JM, Redberg RF, Anderson HV, et al. Low  
654 diagnostic yield of elective coronary angiography. *The New England journal of medicine*.  
655 2010;362(10):886-95. Epub 2010/03/12.
- 656 6. Gibbons RJ, Balady GJ, Bricker JT, Chaitman BR, Fletcher GF, Froelicher VF, et al.  
657 ACC/AHA 2002 guideline update for exercise testing: summary article. A report of the  
658 American College of Cardiology/American Heart Association Task Force on Practice  
659 Guidelines (Committee to Update the 1997 Exercise Testing Guidelines). *Journal of the*  
660 *American College of Cardiology*. 2002;40(8):1531-40. Epub 2002/10/24.
- 661 7. Douglas PS, Khandheria B, Stainback RF, Weissman NJ, Peterson ED, Hendel RC,  
662 et al. ACCF/ASE/ACEP/AHA/ASNC/SCAI/SCCT/SCMR 2008 appropriateness criteria for  
663 stress echocardiography: a report of the American College of Cardiology Foundation  
664 Appropriateness Criteria Task Force, American Society of Echocardiography, American  
665 College of Emergency Physicians, American Heart Association, American Society of Nuclear  
666 Cardiology, Society for Cardiovascular Angiography and Interventions, Society of  
667 Cardiovascular Computed Tomography, and Society for Cardiovascular Magnetic  
668 Resonance endorsed by the Heart Rhythm Society and the Society of Critical Care  
669 Medicine. *Journal of the American College of Cardiology*. 2008;51(11):1127-47. Epub  
670 2008/03/18.
- 671 8. Hendel RC, Berman DS, Di Carli MF, Heidenreich PA, Henkin RE, Pellikka PA, et al.  
672 ACCF/ASNC/ACR/AHA/ASE/SCCT/SCMR/SNM 2009 Appropriate Use Criteria for Cardiac  
673 Radionuclide Imaging: A Report of the American College of Cardiology Foundation  
674 Appropriate Use Criteria Task Force, the American Society of Nuclear Cardiology, the  
675 American College of Radiology, the American Heart Association, the American Society of  
676 Echocardiography, the Society of Cardiovascular Computed Tomography, the Society for  
677 Cardiovascular Magnetic Resonance, and the Society of Nuclear Medicine. *Journal of the*  
678 *American College of Cardiology*. 2009;53(23):2201-29. Epub 2009/06/06.
- 679 9. Hundley WG, Bluemke DA, Finn JP, Flamm SD, Fogel MA, Friedrich MG, et al.  
680 ACCF/ACR/AHA/NASCI/SCMR 2010 expert consensus document on cardiovascular

- 1  
2  
3 681 magnetic resonance: a report of the American College of Cardiology Foundation Task Force  
4 682 on Expert Consensus Documents. *Circulation*. 2010;121(22):2462-508. Epub 2010/05/19.  
5  
6 683 10. Sharples L, Hughes V, Crean A, Dyer M, Buxton M, Goldsmith K, et al. Cost-  
7 684 effectiveness of functional cardiac testing in the diagnosis and management of coronary  
8 685 artery disease: a randomised controlled trial. The CECaT trial. *Health Technol Assess*.  
9 686 2007;11(49):iii-iv, ix-115. Epub 2007/11/21.  
10  
11 687 11. Pryor DB, Shaw L, McCants CB, Lee KL, Mark DB, Harrell FE, Jr., et al. Value of the  
12 688 history and physical in identifying patients at increased risk for coronary artery disease.  
13 689 *Annals of internal medicine*. 1993;118(2):81-90. Epub 1993/01/15.  
14  
15 690 12. Seldinger SI. Catheter replacement of the needle in percutaneous arteriography; a  
16 691 new technique. *Acta radiologica*. 1953;39(5):368-76. Epub 1953/05/01.  
17  
18 692 13. Scanlon PJ, Faxon DP, Audet AM, Carabello B, Dehmer GJ, Eagle KA, et al.  
19 693 ACC/AHA guidelines for coronary angiography. A report of the American College of  
20 694 Cardiology/American Heart Association Task Force on practice guidelines (Committee on  
21 695 Coronary Angiography). Developed in collaboration with the Society for Cardiac  
22 696 Angiography and Interventions. *Journal of the American College of Cardiology*.  
23 697 1999;33(6):1756-824. Epub 1999/05/20.  
24  
25 698 14. Wackers FJ. Exercise myocardial perfusion imaging. *Journal of nuclear medicine* :  
26 699 official publication, Society of Nuclear Medicine. 1994;35(4):726-9. Epub 1994/04/01.  
27  
28 700 15. Pennell DJ, Sechtem UP, Higgins CB, Manning WJ, Pohost GM, Rademakers FE, et  
29 701 al. Clinical indications for cardiovascular magnetic resonance (CMR): Consensus Panel  
30 702 report. *Journal of cardiovascular magnetic resonance* : official journal of the Society for  
31 703 Cardiovascular Magnetic Resonance. 2004;6(4):727-65. Epub 2005/01/14.  
32  
33 704 16. Reeder SB, Atalar E, Faranesh AZ, McVeigh ER. Multi-echo segmented k-space  
34 705 imaging: an optimized hybrid sequence for ultrafast cardiac imaging. *Magnetic resonance in*  
35 706 *medicine* : official journal of the Society of Magnetic Resonance in Medicine / Society of  
36 707 Magnetic Resonance in Medicine. 1999;41(2):375-85. Epub 1999/03/18.  
37  
38 708 17. Canet EP, Janier MF, Revel D. Magnetic resonance perfusion imaging in ischemic  
39 709 heart disease. *Journal of magnetic resonance imaging* : JMRI. 1999;10(3):423-33. Epub  
40 710 1999/10/03.  
41  
42 711 18. Kind P. The EuroQol instrument: an index of health-related quality of life. In: Spiker  
43 712 B, editor. *Quality of life and pharmacoeconomics in clinical trials*. Philadelphia, PA:  
44 713 Lippincott-Raven; 1996.  
45  
46 714 19. Dolan P GC, Kind P. A social tariff for EuroQol: results from a UK general population  
47 715 survey 1995.  
48  
49 716 20. Willan AR, Lin DY, Cook RJ, Chen EB. Using inverse-weighting in cost-effectiveness  
50 717 analysis with censored data. *Statistical methods in medical research*. 2002;11(6):539-51.  
51 718 Epub 2003/01/09.  
52  
53 719 21. Efron B TR. *An introduction to the bootstrap*. San Francisco: Chapman and Hall;  
54 720 1993.  
55  
56  
57  
58  
59  
60



- 1  
2  
3 721 22. Tonino PA, Fearon WF, De Bruyne B, Oldroyd KG, Leesar MA, Ver Lee PN, et al.  
4 722 Angiographic versus functional severity of coronary artery stenoses in the FAME study  
5 723 fractional flow reserve versus angiography in multivessel evaluation. *Journal of the American*  
6 724 *College of Cardiology*. 2010;55(25):2816-21. Epub 2010/06/29.
- 7  
8 725 23. Mozes B, Shabtai E. The appropriateness of performing coronary angiography in two  
9 726 major teaching hospitals in Israel. *International journal for quality in health care : journal of*  
10 727 *the International Society for Quality in Health Care / ISQua*. 1994;6(3):245-9. Epub  
11 728 1994/09/01.
- 12  
13 729 24. Gray D, Hampton JR. Methods of establishing criteria for purchasing coronary  
14 730 angiography in the investigation of chest pain. *Journal of public health medicine*.  
15 731 1994;16(4):399-405. Epub 1994/12/01.
- 16  
17 732 25. Guadagnoli E, Hauptman PJ, Ayanian JZ, Pashos CL, McNeil BJ, Cleary PD.  
18 733 Variation in the use of cardiac procedures after acute myocardial infarction. *The New*  
19 734 *England journal of medicine*. 1995;333(9):573-8. Epub 1995/08/31.
- 20  
21 735 26. Mark DB, Naylor CD, Hlatky MA, Califf RM, Topol EJ, Granger CB, et al. Use of  
22 736 medical resources and quality of life after acute myocardial infarction in Canada and the  
23 737 United States. *The New England journal of medicine*. 1994;331(17):1130-5. Epub  
24 738 1994/10/27.
- 25  
26 739 27. Rouleau JL, Moye LA, Pfeffer MA, Arnold JM, Bernstein V, Cuddy TE, et al. A  
27 740 comparison of management patterns after acute myocardial infarction in Canada and the  
28 741 United States. *The SAVE investigators*. *The New England journal of medicine*.  
29 742 1993;328(11):779-84. Epub 1993/03/18.
- 30  
31 743 28. Tu JV, Pashos CL, Naylor CD, Chen E, Normand SL, Newhouse JP, et al. Use of  
32 744 cardiac procedures and outcomes in elderly patients with myocardial infarction in the United  
33 745 States and Canada. *The New England journal of medicine*. 1997;336(21):1500-5. Epub  
34 746 1997/05/22.
- 35  
36 747 29. Selby JV, Fireman BH, Lundstrom RJ, Swain BE, Truman AF, Wong CC, et al.  
37 748 Variation among hospitals in coronary-angiography practices and outcomes after myocardial  
38 749 infarction in a large health maintenance organization. *The New England journal of medicine*.  
39 750 1996;335(25):1888-96. Epub 1996/12/19.
- 40  
41 751 30. Chan PS, Patel MR, Klein LW, Krone RJ, Dehmer GJ, Kennedy K, et al.  
42 752 Appropriateness of percutaneous coronary intervention. *JAMA : the journal of the American*  
43 753 *Medical Association*. 2011;306(1):53-61. Epub 2011/07/07.
- 44  
45 754 31. Pijls NH, Fearon WF, Tonino PA, Siebert U, Ikeno F, Bornschein B, et al. Fractional  
46 755 flow reserve versus angiography for guiding percutaneous coronary intervention in patients  
47 756 with multivessel coronary artery disease: 2-year follow-up of the FAME (Fractional Flow  
48 757 Reserve Versus Angiography for Multivessel Evaluation) study. *Journal of the American*  
49 758 *College of Cardiology*. 2010;56(3):177-84. Epub 2010/06/12.
- 50  
51 759 32. Griffin SC, Barber JA, Manca A, Sculpher MJ, Thompson SG, Buxton MJ, et al. Cost  
52 760 effectiveness of clinically appropriate decisions on alternative treatments for angina pectoris:  
53 761 prospective observational study. *BMJ*. 2007;334(7594):624. Epub 2007/03/07.
- 54  
55  
56  
57  
58  
59  
60

- 1  
2  
3 762 33. Watkins S, McGeoch R, Lyne J, Steedman T, Good R, McLaughlin MJ, et al.  
4 763 Validation of magnetic resonance myocardial perfusion imaging with fractional flow reserve  
5 764 for the detection of significant coronary heart disease. *Circulation*. 2009;120(22):2207-13.  
6 765 Epub 2009/11/18.  
7  
8 766 34. Krittayaphong R, Chaithiraphan V, Maneesai A, Udompanturak S. Prognostic value  
9 767 of combined magnetic resonance myocardial perfusion imaging and late gadolinium  
10 768 enhancement. *The international journal of cardiovascular imaging*. 2011;27(5):705-14. Epub  
11 769 2011/04/12.  
12  
13 770 35. Bingham SE, Hachamovitch R. Incremental prognostic significance of combined  
14 771 cardiac magnetic resonance imaging, adenosine stress perfusion, delayed enhancement,  
15 772 and left ventricular function over preimaging information for the prediction of adverse events.  
16 773 *Circulation*. 2011;123(14):1509-18. Epub 2011/03/30.  
17  
18 774 36. Greenwood JP, Maredia N, Younger JF, Brown JM, Nixon J, Everett CC, et al.  
19 775 Cardiovascular magnetic resonance and single-photon emission computed tomography for  
20 776 diagnosis of coronary heart disease (CE-MARC): a prospective trial. *Lancet*.  
21 777 2012;379(9814):453-60. Epub 2011/12/27.  
22  
23 778 37. Greenwood JP. CMR versus SPECT for diagnosis of coronary heart disease –  
24 779 Authors' reply *The Lancet*. 2012;379(9832):2147 - 8.  
25  
26 780 38. Beanlands RS, Nichol G, Huszti E, Humen D, Racine N, Freeman M, et al. F-18-  
27 781 fluorodeoxyglucose positron emission tomography imaging-assisted management of patients  
28 782 with severe left ventricular dysfunction and suspected coronary disease: a randomized,  
29 783 controlled trial (PARR-2). *Journal of the American College of Cardiology*. 2007;50(20):2002-  
30 784 12. Epub 2007/11/13.  
31  
32 785 39. Maron DJ, Stone GW, Berman DS, Mancini GB, Scott TA, Byrne DW, et al. Is cardiac  
33 786 catheterization necessary before initial management of patients with stable ischemic heart  
34 787 disease? Results from a Web-based survey of cardiologists. *American heart journal*.  
35 788 2011;162(6):1034-43 e13. Epub 2011/12/06.  
36  
37 789 40. Nallamothu BK, Rogers MA, Chernew ME, Krumholz HM, Eagle KA, Birkmeyer JD.  
38 790 Opening of specialty cardiac hospitals and use of coronary revascularization in medicare  
39 791 beneficiaries. *JAMA : the journal of the American Medical Association*. 2007;297(9):962-8.  
40 792 Epub 2007/03/08.  
41  
42 793 41. Feit F, Mueller HS, Braunwald E, Ross R, Hodges M, Herman MV, et al.  
43 794 Thrombolysis in Myocardial Infarction (TIMI) phase II trial: outcome comparison of a  
44 795 "conservative strategy" in community versus tertiary hospitals. The TIMI Research Group.  
45 796 *Journal of the American College of Cardiology*. 1990;16(7):1529-34. Epub 1990/12/01.  
46  
47 797 42. Blustein J. High-technology cardiac procedures. The impact of service availability on  
48 798 service use in New York State. *JAMA : the journal of the American Medical Association*.  
49 799 1993;270(3):344-9. Epub 1993/07/21.  
50  
51 800 43. Every NR, Larson EB, Litwin PE, Maynard C, Fihn SD, Eisenberg MS, et al. The  
52 801 association between on-site cardiac catheterization facilities and the use of coronary  
53 802 angiography after acute myocardial infarction. Myocardial Infarction Triage and Intervention  
54 803 Project Investigators. *The New England journal of medicine*. 1993;329(8):546-51. Epub  
55 804 1993/08/19.  
56  
57  
58  
59  
60

- 1  
2  
3 805 44. Shaw LJ, Hachamovitch R, Berman DS, Marwick TH, Lauer MS, Heller GV, et al.  
4 806 The economic consequences of available diagnostic and prognostic strategies for the  
5 807 evaluation of stable angina patients: an observational assessment of the value of  
6 808 precatheterization ischemia. *Economics of Noninvasive Diagnosis (END) Multicenter Study*  
7 809 *Group. Journal of the American College of Cardiology.* 1999;33(3):661-9. Epub 1999/03/18.  
8  
9 810 45. Mowatt G, Vale L, Brazzelli M, Hernandez R, Murray A, Scott N, et al. Systematic  
10 811 review of the effectiveness and cost-effectiveness, and economic evaluation, of myocardial  
11 812 perfusion scintigraphy for the diagnosis and management of angina and myocardial  
12 813 infarction. *Health Technol Assess.* 2004;8(30):iii-iv, 1-207. Epub 2004/07/14.  
13  
14 814 46. Underwood SR, Godman B, Salyani S, Ogle JR, Ell PJ. Economics of myocardial  
15 815 perfusion imaging in Europe--the EMPIRE Study. *European heart journal.* 1999;20(2):157-  
16 816 66. Epub 1999/04/01.  
17  
18 817 47. Underwood SR, Shaw LJ, Anagnostopoulos C, Cerqueira M, Ell PJ, Flint J, et al.  
19 818 Myocardial perfusion scintigraphy and cost effectiveness of diagnosis and management of  
20 819 coronary heart disease. *Heart.* 2004;90 Suppl 5:v34-6. Epub 2004/07/16.  
21  
22 820 48. Uchida T, Popma J, Stone GW, Ellis SG, Turco MA, Ormiston JA, et al. The clinical  
23 821 impact of routine angiographic follow-up in randomized trials of drug-eluting stents: a critical  
24 822 assessment of "oculostenotic" reintervention in patients with intermediate lesions. *JACC*  
25 823 *Cardiovascular interventions.* 2010;3(4):403-11. Epub 2010/04/20.  
26  
27 824 49. Christou MA, Siontis GC, Katritsis DG, Ioannidis JP. Meta-analysis of fractional flow  
28 825 reserve versus quantitative coronary angiography and noninvasive imaging for evaluation of  
29 826 myocardial ischemia. *The American journal of cardiology.* 2007;99(4):450-6. Epub  
30 827 2007/02/13.  
31  
32 828 50. Gould KL. Does coronary flow trump coronary anatomy? *JACC Cardiovascular*  
33 829 *imaging.* 2009;2(8):1009-23. Epub 2009/08/15.  
34  
35 830 51. Chang SM, Nabi F, Xu J, Raza U, Mahmarian JJ. Normal stress-only versus  
36 831 standard stress/rest myocardial perfusion imaging: similar patient mortality with reduced  
37 832 radiation exposure. *Journal of the American College of Cardiology.* 2010;55(3):221-30. Epub  
38 833 2009/11/17.  
39  
40 834 52. Boldt J, Leber AW, Bonaventura K, Sohns C, Stula M, Huppertz A, et al. Cost-  
41 835 effectiveness of cardiovascular magnetic resonance and single-photon emission computed  
42 836 tomography for diagnosis of coronary artery disease in Germany. *Journal of cardiovascular*  
43 837 *magnetic resonance : official journal of the Society for Cardiovascular Magnetic Resonance.*  
44 838 2013;15:30. Epub 2013/04/12.  
45  
46 839 53. Walker S, Girardin F, McKenna C, Ball SG, Nixon J, Plein S, et al. Cost-effectiveness  
47 840 of cardiovascular magnetic resonance in the diagnosis of coronary heart disease: an  
48 841 economic evaluation using data from the CE-MARC study. *Heart.* 2013;99(12):873-81. Epub  
49 842 2013/04/18.  
50  
51 843 54. Kuntz KM, Fleischmann KE, Hunink MG, Douglas PS. Cost-effectiveness of  
52 844 diagnostic strategies for patients with chest pain. *Annals of internal medicine.*  
53 845 1999;130(9):709-18. Epub 1999/06/05.  
54  
55  
56  
57  
58  
59  
60

- 1  
2  
3 846 55. Hayashino Y, Nagata-Kobayashi S, Morimoto T, Maeda K, Shimbo T, Fukui T. Cost-  
4 847 effectiveness of screening for coronary artery disease in asymptomatic patients with Type 2  
5 848 diabetes and additional atherogenic risk factors. *Journal of general internal medicine*.  
6 849 2004;19(12):1181-91. Epub 2004/12/22.
- 7  
8 850 56. Tan SS, Oppe M, Zoet-Nugteren SK, Niezen RA, Kofflard MJ, Ten Cate FJ, et al. A  
9 851 microcosting study of diagnostic tests for the detection of coronary artery disease in The  
10 852 Netherlands. *European journal of radiology*. 2009;72(1):98-103. Epub 2008/08/16.
- 11  
12 853 57. Kim C, Kwok YS, Saha S, Redberg RF. Diagnosis of suspected coronary artery  
13 854 disease in women: a cost-effectiveness analysis. *American heart journal*. 1999;137(6):1019-  
14 855 27. Epub 1999/05/29.
- 15  
16 856 58. Lewandowski M, Szwed H, Kowalik I. Searching for the optimal strategy for the  
17 857 diagnosis of stable coronary artery disease. Cost-effectiveness of the new algorithm.  
18 858 *Cardiology journal*. 2007;14(6):544-51. Epub 2008/07/25.
- 19  
20  
21 859  
22  
23  
24 860  
25 861  
26  
27  
28  
29  
30  
31  
32  
33  
34  
35  
36  
37  
38  
39  
40  
41  
42  
43  
44  
45  
46  
47  
48  
49  
50  
51  
52  
53  
54  
55  
56  
57  
58  
59  
60

## CONSORT checklist CECaT Trial BMJ Open Re-Submission

| Item               | Description                                                                                                 | Reported on line number |
|--------------------|-------------------------------------------------------------------------------------------------------------|-------------------------|
| Title              | Identification of the study as randomized                                                                   | 4                       |
| Authors *          | Contact details for the corresponding author                                                                | 26                      |
| Trial design       | Description of the trial design (e.g. parallel, cluster, non-inferiority)                                   | 140                     |
| Methods            |                                                                                                             |                         |
| Participants       | Eligibility criteria for participants and the settings where the data were collected                        | 153-157                 |
| Interventions      | Interventions intended for each group                                                                       | 140-144 & 163-165       |
| Objective          | Specific objective or hypothesis                                                                            | 147                     |
| Outcome            | Clearly defined primary outcome for this report                                                             | 219                     |
| Randomization      | How participants were allocated to interventions                                                            | 159                     |
| Blinding (masking) | Whether or not participants, care givers, and those assessing the outcomes were blinded to group assignment | 140                     |
| Results            |                                                                                                             |                         |
| Numbers randomized | Number of participants randomized to each group                                                             | 285 & 582               |
| Recruitment        | Trial status                                                                                                |                         |
| Numbers analysed   | Number of participants analysed in each group                                                               | 582                     |
| Outcome            | For the primary outcome, a result for each group and the estimated effect size and its precision            | 585                     |
| Harms              | Important adverse events or side effects                                                                    | 318-9                   |
| Conclusions        | General interpretation of the results                                                                       | 540                     |
| Trial registration | Registration number and name of trial register                                                              | 124                     |
| Funding            | Source of funding                                                                                           | 546-548                 |

Figure 1 Trial summary

1  
2  
3  
4  
5  
6  
7  
8  
9  
10  
11  
12  
13  
14  
15  
16  
17  
18  
19  
20  
21  
22  
23  
24  
25  
26  
27  
28  
29  
30  
31  
32  
33  
34  
35  
36  
37  
38  
39  
40  
41  
42  
43  
44  
45  
46  
47  
48  
49  
50  
51  
52  
53  
54  
55  
56  
57  
58

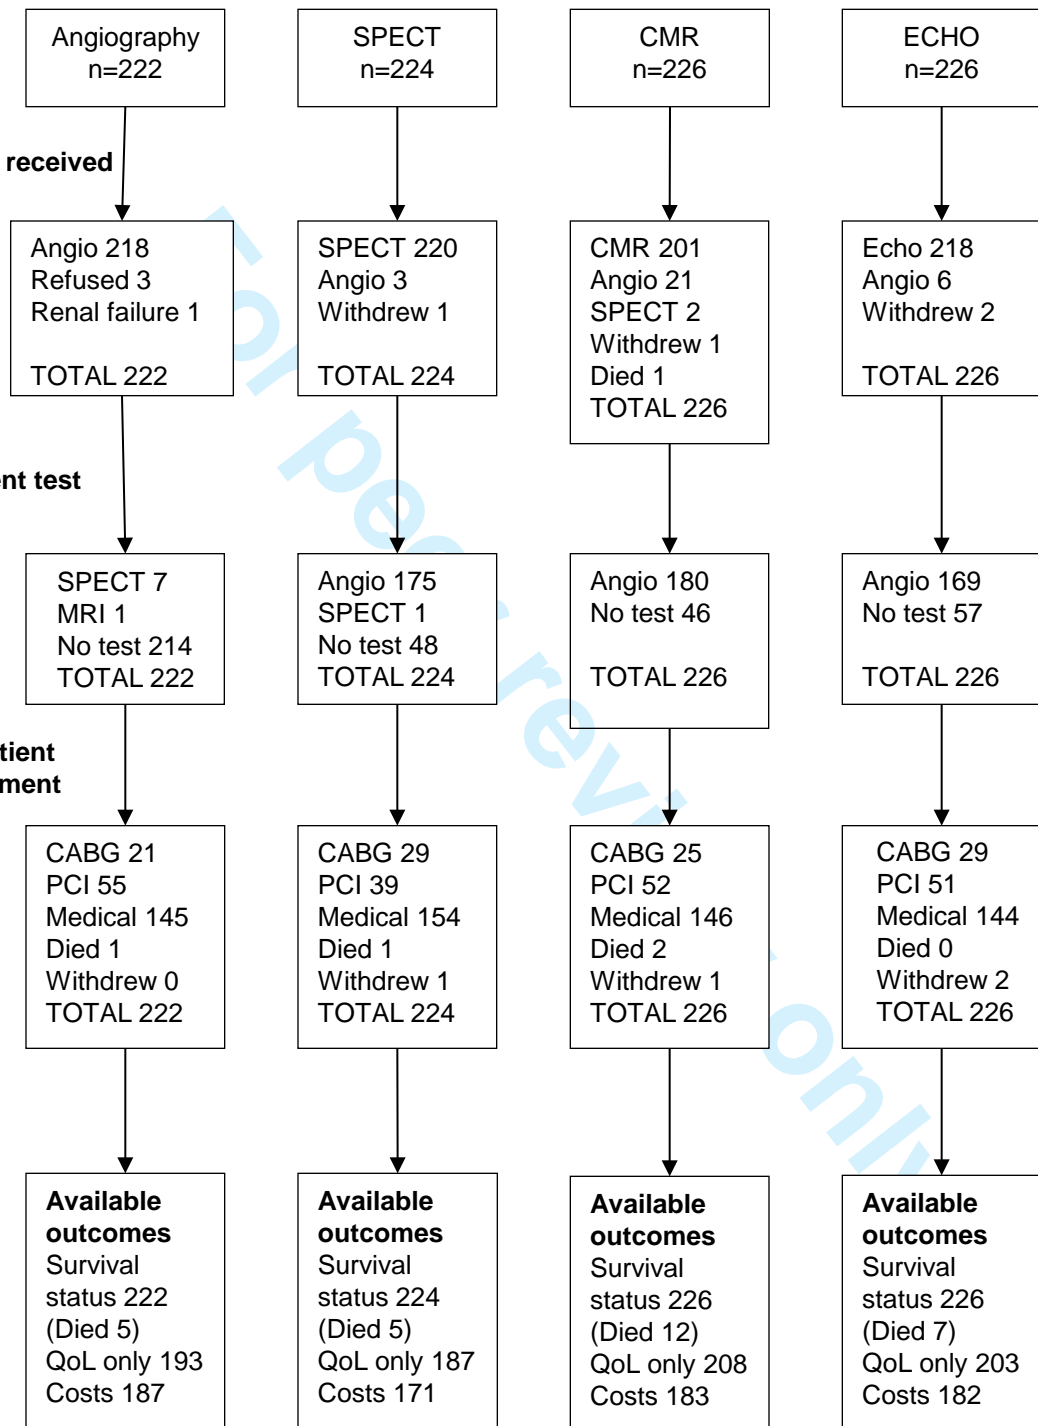

Final assessment at 2 years post treatment

1  
2  
3  
4  
5  
6  
7  
8  
9  
10  
11  
12  
13  
14  
15  
16  
17  
18  
19  
20  
21  
22  
23  
24  
25  
26  
27  
28  
29  
30  
31  
32  
33  
34  
35  
36  
37  
38  
39  
40

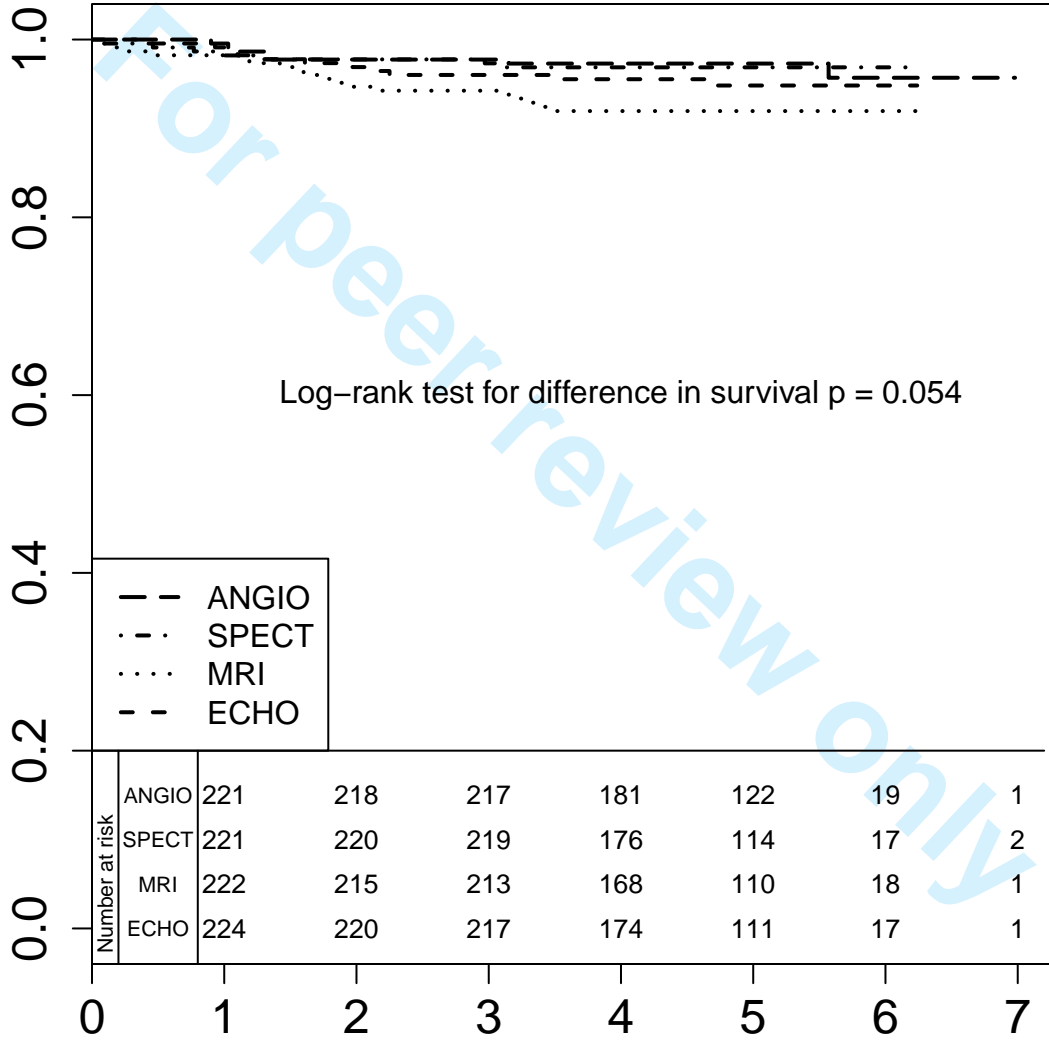

For peer review only – <http://bmjopen.bmj.com/site/about/guidelines.xhtml>

survival time (years)

1  
2  
3  
4  
5  
6  
7  
8  
9  
10  
11  
12  
13  
14  
15  
16  
17  
18  
19  
20  
21  
22  
23  
24  
25  
26  
27  
28  
29  
30  
31  
32  
33  
34  
35  
36  
37  
38  
39  
40

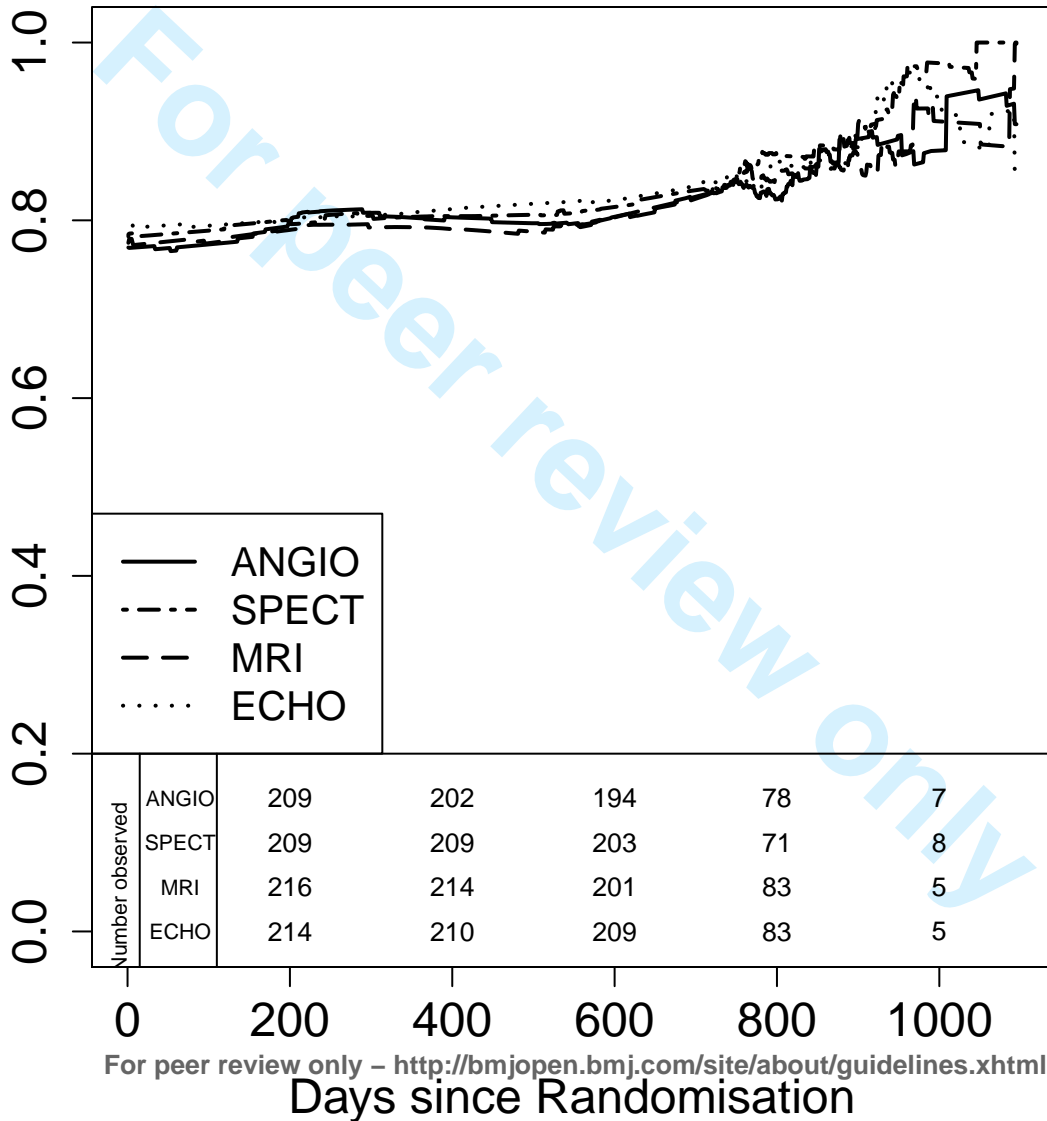



**SPECT – ANGIO**

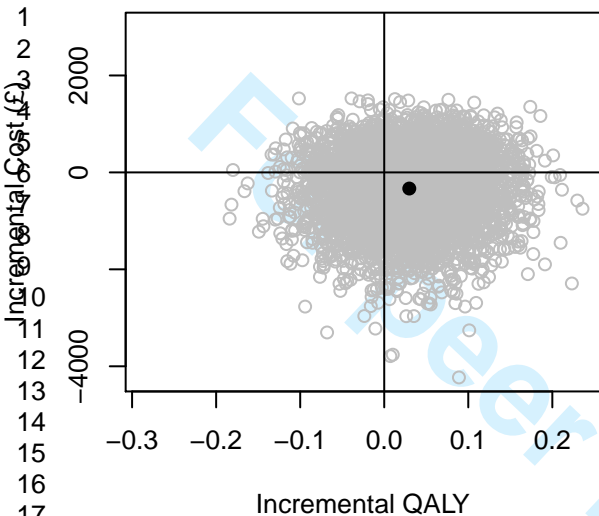

**MRI – ANGIO**

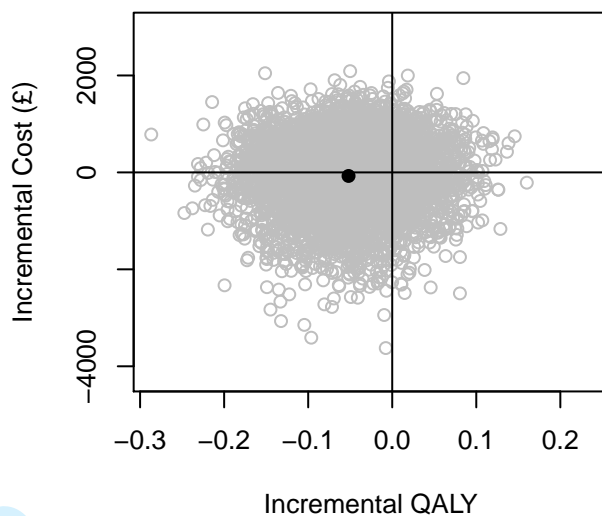

**ECHO – ANGIO**

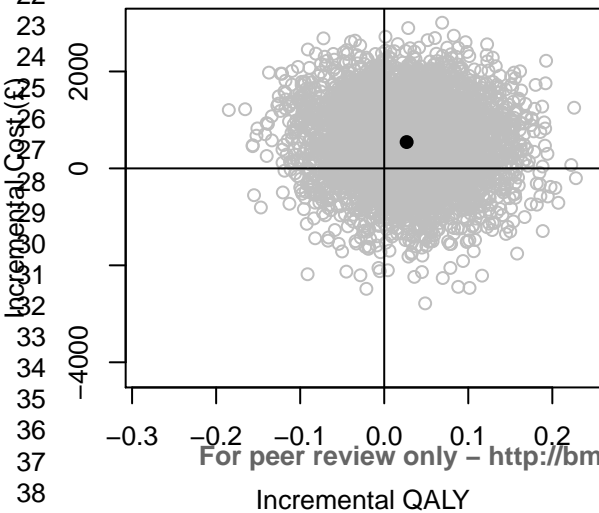

# Cost effectiveness acceptability curves

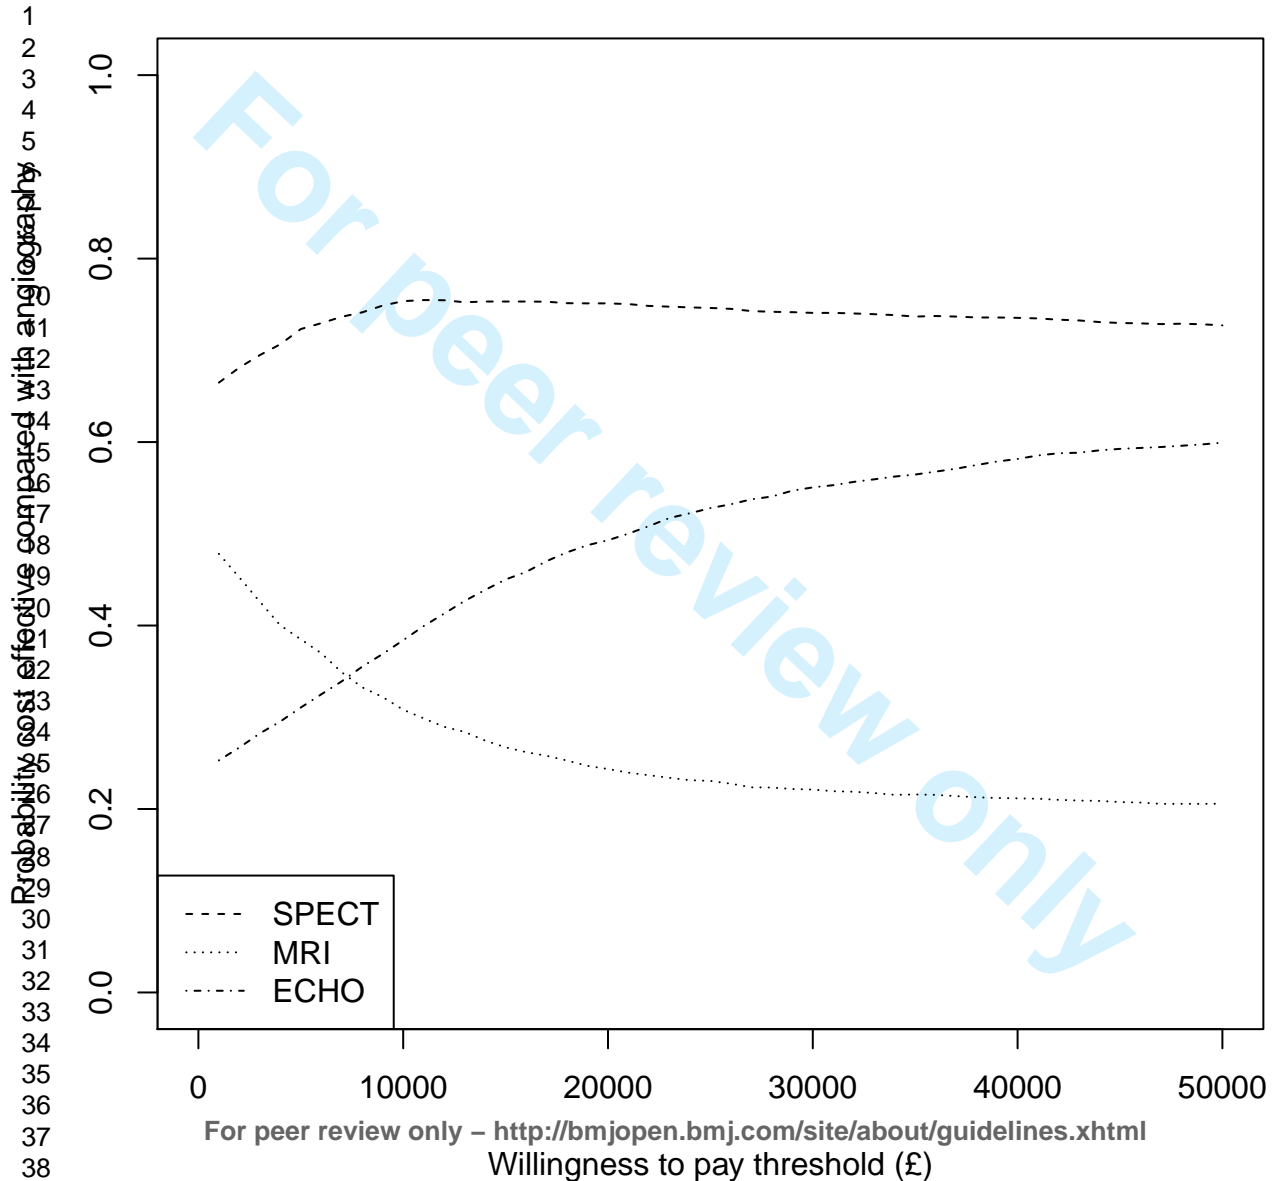



**Cost effectiveness of initial stress cardiovascular MR, stress SPECT or stress echocardiography as a gatekeeper test, compared to upfront invasive coronary angiography in the investigation and management of patients with stable chest pain: mid term outcomes from the CECaT\* randomised controlled trial**

|                                 |                                                                                                                                                                                                                                                                                                                                                                                                                                                                                                      |
|---------------------------------|------------------------------------------------------------------------------------------------------------------------------------------------------------------------------------------------------------------------------------------------------------------------------------------------------------------------------------------------------------------------------------------------------------------------------------------------------------------------------------------------------|
| Journal:                        | <i>BMJ Open</i>                                                                                                                                                                                                                                                                                                                                                                                                                                                                                      |
| Manuscript ID:                  | bmjopen-2013-003419.R2                                                                                                                                                                                                                                                                                                                                                                                                                                                                               |
| Article Type:                   | Research                                                                                                                                                                                                                                                                                                                                                                                                                                                                                             |
| Date Submitted by the Author:   | 28-Nov-2013                                                                                                                                                                                                                                                                                                                                                                                                                                                                                          |
| Complete List of Authors:       | Thom, Howard; Institute of Public Health, Biostatistics West, Nicholas; Papworth Hospital, Cardiology<br>Hughes, Vikki; Papworth Hospital, Research & Development<br>Dyer, Matthew; Brunel University, Health Economics Research Group<br>Buxton, Martin; Brunel University, Health Economics Research Group<br>Sharples, Linda; Institute of Public Health, Biostatistics<br>Jackson, Christopher; Institute of Public Health, Biostatistics<br>Crean, Andrew; Toronto General Hospital, Cardiology |
| <b>Primary Subject Heading</b>: | Cardiovascular medicine                                                                                                                                                                                                                                                                                                                                                                                                                                                                              |
| Secondary Subject Heading:      | Health economics, Health policy, Health services research, Medical management, Radiology and imaging                                                                                                                                                                                                                                                                                                                                                                                                 |
| Keywords:                       | Adult cardiology < CARDIOLOGY, Ischaemic heart disease < CARDIOLOGY, Health economics < HEALTH SERVICES ADMINISTRATION & MANAGEMENT, Health policy < HEALTH SERVICES ADMINISTRATION & MANAGEMENT, Cardiology < INTERNAL MEDICINE, Cardiovascular imaging < RADIOLOGY & IMAGING                                                                                                                                                                                                                       |
|                                 |                                                                                                                                                                                                                                                                                                                                                                                                                                                                                                      |

SCHOLARONE™  
Manuscripts

1  
2  
3  
4  
5  
6  
7  
8  
9  
10  
11  
12  
13  
14  
15  
16  
17  
18  
19  
20  
21  
22  
23  
24  
25  
26  
27  
28  
29  
30  
31  
32  
33  
34  
35  
36  
37  
38  
39  
40  
41  
42  
43  
44  
45  
46  
47  
48  
49  
50  
51  
52  
53  
54  
55  
56  
57  
58  
59  
60

**Title: Cost effectiveness of initial stress cardiovascular MR, stress SPECT or stress echocardiography as a gatekeeper test, compared to upfront invasive coronary angiography in the investigation and management of patients with stable chest pain: mid term outcomes from the CECaT\* randomised controlled trial**

\*Cost Effectiveness of non-invasive Cardiac Testing

Howard Thom MSc, Nicholas West MD, FRCP, Vikki Hughes PhD, Matthew Dyer MSc, Martin Buxton MSc, Linda D Sharples PhD, Christopher H Jackson PhD, Andrew M Crean MRCP, FRCR

**Affiliations:**

MRC Biostatistics Unit, Institute of Public Health, Cambridge CB2 0SR, UK, Howard Thom, biostatistician; Department of Cardiology, Papworth Hospital, Cambridge, CB23 3RE, UK Nicholas West, consultant cardiologist; Research and Development Office, Papworth Hospital, Cambridge, CB23 3RE , UK ,Vikki Hughes senior research analyst; Health Economics Research Group, Brunel University, Uxbridge, Middlesex UB8 3PH, UK, Matthew Dyer, research fellow; Health Economics Research Group, Brunel University, Uxbridge, Middlesex UB8 3PH, UK, Martin Buxton, professor; and Clinical Trials Research Unit, University of Leeds, West Yorkshire LS2 9JT, UK, Linda D Sharples, professor; MRC Biostatistics Unit, Institute of Public Health, Cambridge CB2 0SR, UK, Christopher H Jackson, senior statistician; Division of Cardiology, Toronto General Hospital, Toronto, M5G 2C4, Canada, Andrew M Crean, assistant professor of medicine & radiology.

**Corresponding author:** Dr Andrew Crean MRCP FRCR, Division of Cardiology, Toronto General Hospital, 585 University Avenue, Toronto, ON, Canada M5G 2C4

**Tel:** 1 416 340 4800 **Fax:** 1 888 502 6601 **Email:** [andrew.crean@uhn.ca](mailto:andrew.crean@uhn.ca)

**Clinical Trial registration:** ISRCTN 47108462, UKCRN 3696

1  
2  
3 30 **The CECaT study group were:**

4  
5 31 Johanna Armstrong, Martin Buxton, Noreen Caine, Richard Coulden, Andrew Crean,

6  
7 32 Matthew Dyer, Margaret Gillham, Hester Goddard, Kim Goldsmith, Vikki Hughes, Evelyn

8  
9 33 Lee, Roger Patel, Peter Schofield, Linda Sharples, Emer Sonnex, David Stone, Carmen

10  
11 34 Treacy

12  
13 35

14  
15 36

16  
17 37

18  
19 38

20  
21 39

22  
23 40

24  
25 41

26  
27 42

28  
29 43

30  
31 44

32  
33 45

34  
35 46

36  
37 47

38  
39 48

40  
41 49

42  
43 50

44  
45 51

46  
47 52

48  
49 53

50  
51 54

52  
53 55

54  
55 56

56  
57 57

58  
59  
60

1  
2  
3 58 **Abstract**

4  
5 59 **Objectives:** to compare outcomes and cost effectiveness of various initial imaging strategies on  
6  
7 60 the management of stable chest pain in a long term prospective randomized trial.

8  
9 61 **Setting:** regional cardiothoracic referral center in the east of England

10  
11 62 **Participants:** 898 patients (69% male) entered the study with 869 alive at 2yr follow up.  
12  
13 63 Patients were included if they presented for assessment of stable chest pain with a positive  
14  
15 64 exercise test and no prior history of ischemic heart disease. Exclusion criteria were recent  
16  
17 65 infarction, unstable symptoms or any contra-indication to stress MRI.

18  
19 66 **Primary outcome measures:** The primary outcomes of this follow up study were survival up  
20  
21 67 to a minimum of 2 years post-treatment, quality-adjusted survival and cost-utility of each  
22  
23 68 strategy

24  
25 69 **Results:** 898 patients were randomized. Compared to angiography, mortality was  
26  
27 70 marginally higher in the groups randomized to CMR (hazard ratio 2.6, 95%CI 1.1, 6.2), but  
28  
29 71 similar in the SPECT-MIBI (hazard ratio 1.0, 95%CI 0.4, 2.9) and ECHO groups (hazard ratio  
30  
31 72 1.6, 95%CI 0.6, 4.0). Although SPECT-MIBI was marginally superior to other non-invasive  
32  
33 73 tests there were no other significant differences between the groups in mortality, quality  
34  
35 74 adjusted survival or costs.

36  
37 75 **Conclusions:** Non-invasive cardiac imaging can be used safely as the initial diagnostic test  
38  
39 76 to diagnose CAD without adverse effects on patient outcomes or increased costs, relative to  
40  
41 77 angiography. These results should be interpreted in the context of recent advances in  
42  
43 78 imaging technology.

44  
45 79 **Trial registration:** ISRCTN 47108462, UKCRN 3696

46  
47 80 **Key words:** MRI, cardiovascular magnetic resonance, comparative effectiveness, SPECT,  
48  
49 81 stress echo, coronary angiography.

50  
51 82

52  
53 83

54  
55 84

56  
57 85

58  
59 86

60  
61 87

1  
2  
3 86 **Article summary:**  
4

5 87 *Article focus:*  
6

- 7 88 1. Is non-invasive imaging a safe and appropriate gate-keeper to coronary angiography  
8  
9 89 in patients with stable chest pain ?  
10  
11 90 2. Is there any difference in cost-effectiveness and cost-utility between the different  
12  
13 91 non-invasive approaches and conventional coronary angiography  
14  
15 92 3. Are patients disadvantaged in any meaningful way by having a non-invasive test to  
16  
17 93 decide whether they should go forward for coronary angiography ?  
18  
19 94 4. How does stress perfusion CMR compare to the more established tests of SPECT-  
20  
21 95 MIBI and stress echocardiography as a gate-keeper to coronary angiography ?  
22  
23 96

24  
25 97 *Key messages:*  
26

- 27 98 1. Non-invasive testing may be used safely as a gate-keeper to coronary angiography  
28  
29 99 in patients with stable chest pain without any material disadvantage to them in terms  
30  
31 100 of survival and quality of life up to 6 years after initial randomisation.  
32  
33 101 2. SPECT-MIBI appears marginally superior statistically to the other non-invasive  
34  
35 102 methods although clinically meaningful differences are small between all strategies.  
36  
37 103 3. Stress perfusion CMR appears to be an effective technique in a stable out-patient  
38  
39 104 population with undiagnosed chest pain.  
40  
41 105

42  
43 106 *Strengths and limitations:*  
44

- 45 107 1. This is the only large randomised prospective trial of a strategy of non-invasive gate-  
46  
47 108 keeper cardiac imaging versus upfront angiography in the literature.  
48  
49 109 2. The cost-utility data are derived from NHS tariffs and our results are not necessarily  
50  
51 110 directly transferrable to other healthcare systems  
52  
53 111

## 112 Introduction

113

114 CAD is common and its management is costly<sup>(1)</sup>. Revascularisation using bypass surgery  
115 (CABG) or percutaneous coronary intervention (PCI) is effective for patients with severe  
116 disease<sup>(2)</sup> but a significant minority of patients do not gain symptomatic relief<sup>(3)</sup>. Data from  
117 the COURAGE trial did not show prognostic benefit from revascularization in any patient  
118 subgroup<sup>(4)</sup>. The yield of coronary angiography is variable with one recent large study of  
119 nearly 400, 000 patients demonstrating a normalcy rate approaching 40%<sup>(5)</sup>. Therefore  
120 non-invasive testing to identify those with a low likelihood of obstructive CAD may be safer,  
121 cheaper and more appropriate than upfront angiography. This approach is codified in  
122 multiple AHA/ACC guidelines on the investigation of stable or suspected angina pectoris in  
123 which initial non-invasive imaging is rated as highly appropriate<sup>(6) (7) (8) (9)</sup>.

124

125 The 'Cost-Effectiveness of non-invasive Cardiac Testing' (CECaT) trial was an unblinded  
126 non-inferiority trial designed to assess three functional tests - stress echocardiography,  
127 single photon emission computed tomography (SPECT) and stress cardiac magnetic  
128 resonance imaging (CMR) - as a gatekeeper to coronary angiography (CA) in patients  
129 referred for CA with suspected coronary artery disease (CAD). Early clinical and cost-  
130 effectiveness estimates have been published and showed that the CMR group had slightly  
131 lower mean exercise treadmill time according to the Bruce protocol but otherwise the tests  
132 could be considered equally effective<sup>(10)</sup>. This report provides the main cost-effectiveness  
133 and mortality outcomes up to 6 years after randomisation.

134

## 135 Methods

### 136 Study design

137 The design of the study has been described elsewhere<sup>(10)</sup> and is reviewed briefly here. All  
138 patients referred to Papworth Hospital, UK for non-urgent angiography were eligible for the  
139 study. Inclusion criteria were: established or suspected chronic stable angina and a positive



1  
2  
3 140 exercise tolerance test result with subsequent referral for angiography. Exclusion criteria  
4  
5 141 were: recent MI (<3 months), revascularisation (<6 months); urgent need for  
6  
7 142 revascularisation; contra-indication to adenosine or CMR; inability to exercise.  
8

9 143

10  
11 144 Trial design was of four parallel arms with a 1:1:1:1 randomisation ratio. Randomisation was  
12  
13 145 computer generated and stratified according to Pryor risk assessment<sup>(11)</sup>. Within each Pryor  
14  
15 146 risk group, randomisation was in blocks of length 6 or 8. Sequentially numbered group  
16  
17 147 designation was held in the Research & Development (R&D) Office and was not available to  
18  
19 148 trial personnel. Patients were randomised to their initial diagnostic test - stress SPECT,  
20  
21 149 stress CMR, stress echocardiography, or angiography - by R&D within 4 weeks of  
22  
23 150 recruitment and only after they had given consent and been registered.  
24

25 151

26  
27 152 Non invasive imaging results were returned with a recommendation to proceed with  
28  
29 153 angiography only when reported as 'positive' for inducible ischemia. Protocol adherence to  
30  
31 154 this recommendation was not mandated by trial design and patients proceeded to  
32  
33 155 angiography if considered clinically indicated. Treatment with PCI or CABG (performed  
34  
35 156 within six months of angiography) or to medical therapy was according to standard practice.  
36

37 157

### 38 158 **Coronary angiography.**

39  
40  
41 159 Standard diagnostic angiography was performed from the right femoral artery approach<sup>(12)</sup>.  
42  
43 160 A minimum of 5 views of the left and 3 views of the right coronary system were taken<sup>(13)</sup>. All  
44  
45 161 examinations were reported by an experienced staff cardiologist and segmental location of  
46  
47 162 disease (if any) recorded.  
48

49 163

### 50 164 **Stress echocardiography**

51  
52  
53 165 Beta-blocker medications were stopped 2 days beforehand. Dobutamine was infused at  
54  
55 166 rates of 10- 40 mcg/kg/min, increased at 3 minute intervals. If necessary, 300-600  
56  
57 167 micrograms of atropine were added at peak stress to achieve 90% of target heart  
58  
59  
60

1  
2  
3 168 rate. Images were acquired in standard planes in the final minute of each 3 minute stage.  
4  
5 169 Intravenous microspheres were used to delineate the endocardial surface. All examinations  
6  
7 170 were reported by one of two staff cardiologists experienced in stress echocardiography.  
8  
9 171 Studies were positive for ischemia if stress-induced deterioration in contractility was  
10  
11 172 observed.

173

**174 SPECT**

175 Rest/stress 99mTc sestamibi (99mTc MIBI) SPECT was performed (2 day protocol). A 6  
176 minute adenosine infusion (140 µg/kg/min) was employed. 400 MBq 99m-Tc MIBI was  
177 administered at 3 minutes after infusion of adenosine was started. Gated SPECT imaging  
178 occurred 60 minutes after injection. Tomographic images were assessed for fixed and  
179 reversible defects by a single observer (as per established criteria)<sup>(14)</sup>.

180

**181 CMR**

182 Stress CMR imaging was performed at a standard similar to that which was subsequently  
183 recommended by the Society of Cardiovascular Magnetic Resonance <sup>(15)</sup>. A 1.5T mobile  
184 CMR system and 4-channel phased array surface coil were used (Signa CV/i, GE Medical  
185 Systems). Stress/rest dynamic first-pass perfusion imaging was performed. A hybrid fast  
186 gradient echo/echoplanar sequence was employed <sup>(16)</sup>. Adenosine was infused at 140  
187 mcg/kg/min for 4 minutes. After 3 minutes, a bolus of Gadolinium-DTPA (0.1mmol/kg) was  
188 delivered at 5mls/sec, followed by a 25ml saline flush. First-pass imaging of the heart  
189 occurred over 80 heart beats. A volumetric notched-saturation pre-pulse preserved a  
190 constant saturation-recovery time during slice acquisition <sup>(17)</sup>. 6-8 short axis slices were  
191 obtained every 2 heart beats. Rest imaging was repeated after a minimum interval of 15  
192 minutes. Cine steady state free precession images and late gadolinium enhancement  
193 images were also acquired as described in the original CECaT protocol <sup>(10)</sup> Studies were  
194 reported as positive if there was an inducible perfusion defect visible for at least 5 frames

1  
2  
3 195 either: a) in a region of normal wall thickness; or b) in a region of myocardial thinning in the  
4  
5 196 absence of a history of prior myocardial infarction.  
6

7 197

### 8 9 198 **Outcomes**

10  
11 199 The primary outcome in the original CECaT trial was exercise treadmill time at 18 months  
12  
13 200 post-randomisation using the modified Bruce protocol, in which exercise intensity was  
14  
15 201 increased every 3 minutes. There was a range of secondary outcomes including diagnostic  
16  
17 202 accuracy, clinical events, health-related quality and cost-effectiveness of life up to 18 months  
18  
19 203 after randomisation<sup>(10)</sup>.

20  
21 204 The primary outcomes of this follow up study were survival up to a minimum of 2 years post-  
22  
23 205 treatment, quality-adjusted survival and cost-utility of each strategy. Survival status at the  
24  
25 206 end of follow up was determined from the Office for National Statistics database, UK  
26  
27 207 (<http://www.ons.gov.uk/>).

28  
29 208 Quality of life was measured using the EuroQoL EQ-5D questionnaire<sup>(18)</sup> which was  
30  
31 209 completed at baseline, 6 and 18 months post-randomisation, and at 6, 18 and 24 months  
32  
33 210 post-treatment. The social tariff for the EQ-5D was applied in order to calculate utility values  
34  
35 211<sup>(19)</sup>. Because post-treatment measurements were at variable times post-randomisation  
36  
37 212 (randomisation date is time zero for a randomised trial) daily utilities were estimated using  
38  
39 213 linear interpolation.  
40

41 214

### 42 43 215 **Sample size calculations**

44  
45 216 The sample size of 898 patients was based on exercise performance and was calculated  
46  
47 217 according to the methodology published in the initial report of the CECaT study<sup>(10)</sup>.  
48

49 218

### 50 51 219 **Statistical and economic analysis**

52  
53 220 For this study, survival was summarised using Kaplan-Meier estimates and the groups were  
54  
55 221 compared using Cox proportional hazards regression. This assumes that the instantaneous  
56  
57 222 risk of death (hazard) for a reference value of a covariate will vary through time, but that the  
58  
59  
60

1  
2  
3 223 hazards for other values of the covariate will be a constant multiple of this baseline hazard,  
4  
5 224 and this multiple will not vary through time. This assumption was tested using Schoenfeld  
6  
7 225 residuals and there was little evidence against it. The diagnostic test was entered into the  
8  
9 226 Cox regression as a 4-level fixed covariate, with angiography as the reference category. In  
10  
11 227 sensitivity analysis CABG and PCI were included in the regression analyses as time-varying  
12  
13 228 covariates, taking a value 0 up to the time of intervention and 1 thereafter, to ensure that any  
14  
15 229 differences between the groups was not due to differences in treatment. Inclusion of  
16  
17 230 treatment (CABG/PCI) did not affect comparison of diagnostic strategies and results of these  
18  
19 231 analyses are not included here.  
20  
21 232  
22  
23 233 Patient-specific hospital resource use was collected for 2 years post-*treatment* with  
24  
25 234 revascularisation or medical management. Costs were based on National Health Service  
26  
27 235 reference costs 2005/06 prices. An annual discount rate of 3.5% was applied to all costs and  
28  
29 236 quality-adjusted life-years (QALYs) after 12 months post-randomisation. Resources costed  
30  
31 237 were: imaging tests; revascularisation; inpatient/outpatient episodes; adverse events;  
32  
33 238 cardiac-related medications. Patient-reported admissions for MI were verified with the  
34  
35 239 admitting hospital and adjudicated.  
36  
37 240  
38  
39 241 Quality adjusted survival and cost estimates were censored at the last follow up at 2 years  
40  
41 242 after treatment, resulting in varying duration of follow-up from the time of randomisation to  
42  
43 243 the different diagnostic strategies, so that mean values over a range of time horizons were  
44  
45 244 estimated using inverse weighting methods<sup>(20)</sup>. This method allows for differing follow up  
46  
47 245 times between patients by splitting follow up time into intervals, and up-weighting the  
48  
49 246 observed quality adjusted survival and costs in an interval in proportion to the inverse of the  
50  
51 247 Kaplan-Meier estimate of the proportion observed during the interval. In the base case we  
52  
53 248 used a time horizon of 3 years since it was the longest period over which results were stable,  
54  
55 249 with acceptable precision. Confidence intervals for costs and QALYs were estimated using  
56  
57 250 bootstrapping with 5000 samples<sup>(21)</sup>.  
58  
59  
60

1  
2  
3 251 **Sensitivity analysis**

4  
5 252 Sensitivity of cost-utility results for different time horizons was assessed by re-estimating  
6  
7 253 results up to 12, 18, 24, 36 and 48 months after randomization. In addition, cardiologists  
8  
9 254 were divided into those who did and did not perform percutaneous coronary intervention as  
10  
11 255 part of their routine clinical practice, and results were recalculated for each subgroup. With  
12  
13 256 the exception of this *post-hoc* data interrogation, all other results presented derive from  
14  
15 257 intention-to-treat analysis.  
16

17 258

18  
19 259 The study had IRB approval and full written informed consent was obtained from all  
20  
21 260 participants. All authors had full access to the data and take responsibility for the manuscript  
22  
23 261 as written.  
24

25 262

26  
27 263 **Results**

28  
29 264 **Recruitment and compliance**

30  
31 265 Between September 2001 and September 2004, 3,201 patients were assessed, 1,981 were  
32  
33 266 excluded and 322 refused entry to the trial. Refusals were more likely to come from women  
34  
35 267 (46% compared with 31% enrolled into the study,  $p<0.001$ ) and were significantly older  
36  
37 268 (mean age 64.6, (SD 10.1) compared with study group mean age 61.8, (9.4),  $p<0.001$ ).  
38

39 269

40  
41 270 898 patients were randomised. Groups were well matched at baseline (table 1). In each  
42  
43 271 group 69% of patients were high risk for CAD (Pryor score  $> 0.8$ ). The trial was closed to  
44  
45 272 recruitment in September 2004 after enrolling the pre-specified number of subjects.  
46

47 273

48  
49 274 One-hundred-seventy-five (78%) SPECT patients, 180 (80%) CMR patients and 169 (75%)  
50  
51 275 stress echo patients were referred on for angiography (**Figure 1**). Between 20% and 25% of  
52  
53 276 patients undergoing non-invasive tests did not require further investigation. Twenty-one  
54  
55 277 percent of patients who had negative tests were referred for angiography and the proportion  
56  
57 278 was similar in each group (SPECT  $n=45$ , CMR  $n=50$ , ECHO  $n=48$ ,  $p=0.858$ ). Of these 14  
58  
59  
60

1  
2  
3 279 (31%) SPECT, 26 (52%) CMR and 23 (48%) ECHO resulted in a positive angiogram  
4  
5 280 ( $p=0.130$ ). Four patients died and four withdrew from the trial early on. Of the remaining  
6  
7 281 patients, revascularization was required in 34% (301/890 – see **Figure 1** for numbers in  
8  
9 282 each arm). There was no significant difference between the groups in initial patient  
10  
11 283 management (Figure 1,  $p=0.527$ ). Beyond the initial management strategy 42 subsequent  
12  
13 284 revascularisation procedures were required in the angiography arm compared with 30 in the  
14  
15 285 SPECT, 44 in the CMR and 41 in the ECHO arms. The median times between  
16  
17 286 randomisation and initial revascularisation were 122 days in the angiography group, 192  
18  
19 287 days for SPECT, 184 days for CMR and 177.5 days for ECHO, resulting in a delay due to  
20  
21 288 functional testing of approximately 2 months.  
22  
23  
24

289

### 290 **Survival**

291 During the study there were 7 (3%), 7 (3%), 18 (8%) and 11 (5%) deaths in the angiography  
292 , SPECT, CMR and ECHO groups respectively. Kaplan-Meier survival curves for the 4  
293 groups are plotted in **Figure 2**. Survival over the whole trial period in the SPECT (hazard  
294 ratio 1.0, 95%CI 0.4, 2.9) and stress echo (hazard ratio 1.6, 95%CI 0.6, 4.0) groups were not  
295 significantly different from angiography but the CMR group had higher mortality, with hazard  
296 ratio 2.6 (95%CI 1.1 to 6.2),  $p=0.032$ . The significant effect of CMR on survival remained  
297 when CABG or PCI were included in the models. However, mortality was low in all groups  
298 and the absolute mean difference in survival was less than 1 month over 3 years (**Table 2**).  
299 Mean survival estimates over 3 years with 95% confidence intervals are shown in **Table 2**.  
300 All patients had complete adverse event data up to 18 months post-randomisation during  
301 which there were 178 non-fatal adverse events in 114 patients, mostly hospital admissions  
302 for chest pain (**Table 3**). Beyond this time only adverse events that resulted in admissions  
303 were recorded as they were relevant for the economic analysis. No patient suffered any  
304 adverse event at the time of the initial randomised imaging test.  
305

306

### 306 **Cost-utility**

1  
2  
3 307 **Table 4** shows some of the highest incurred follow up costs for the 4 groups and shows that  
4  
5 308 patient management varied substantially between individuals. Although angiography was the  
6  
7 309 most expensive of the four initial diagnostic tests, the strategy of initial angiography had  
8  
9 310 lower mean overall cost than stress echo, and was similar to CMR up to 3 years (**Table 2**).  
10  
11 311 Extra costs for patients in the three non-invasive groups was largely due to patients  
12  
13 312 undergoing follow-on angiography. There were no significant differences in overall costs  
14  
15 313 between the groups.  
16

17 314  
18  
19 315 During the study there were no significant differences in EQ-5D between the groups. **Figure**  
20  
21 316 **3** shows daily mean EQ-5D utility over time based on interpolation between measurements  
22  
23 317 for survivors who completed the EQ-5D. Using inverse-weighting we calculated QALYs over  
24  
25 318 different time horizons and these are presented up to 3 years in **Table 2**. Mean QALYs over  
26  
27 319 3 years in the angiography group was 2.24, which was not significantly different from the  
28  
29 320 other groups. **Figure 4** shows the joint distribution of the difference in mean cost against the  
30  
31 321 difference in mean QALY for each diagnostic strategy group and angiography alone, and  
32  
33 322 shows the uncertainty in these estimates. **Figure 5** shows the Cost-Effectiveness  
34  
35 323 Acceptability Curve and demonstrated that SPECT has a high chance (>70%) of being cost-  
36  
37 324 effective whatever the willingness-to-pay threshold is but for CMR and ECHO there is much  
38  
39 325 less certainty about this decision. The mean differences between groups were close to zero  
40  
41 326 in all 3 cases so that the cost-per-QALY estimates are unstable and a cost-minimization  
42  
43 327 approach may be more appropriate. This would favour SPECT, which was both cheaper and  
44  
45 328 more effective on average than angiography, and had the lowest overall cost ( ).  
46  
47 329

### 330 **Sensitivity analysis**

331 The comparisons between the diagnostic strategy groups did not change substantially when  
332 we varied the time horizon; the main effect of this was that the variation surrounding  
333 estimates increased as the time horizon lengthened due to the heavy censoring (results not  
334 shown). **Tables 2a and 2b** show results for interventional and non-invasive cardiologists



1  
2  
3 335 respectively. Patients who were managed by interventional cardiologists incurred higher  
4  
5 336 costs due to the greater number of tests and revascularization procedures performed, with  
6  
7 337 minimal incremental benefit in QALY.  
8

9 338

## 10 339 **Discussion**

11  
12  
13 340 CECaT is the first completed prospective randomized trial to look at the clinical and cost-  
14  
15 341 effectiveness of non-invasive imaging in the diagnosis and management of angina. To the  
16  
17 342 best of the authors' knowledge there has been no comparable outcomes trial published on  
18  
19 343 this scale evaluating three independent non-invasive 'gatekeeper' modalities versus initial  
20  
21 344 angiography in stable chest pain. The trial is also unusual in the length of prospective follow  
22  
23 345 up extending to 6 years for mortality outcomes.  
24

25 346

26  
27 347 We have demonstrated that use of any one of stress CMR, stress echo or stress SPECT as  
28  
29 348 the initial test for a stable chest pain patient leads to non-inferior outcomes in quality of life  
30  
31 349 and cost utility compared to patients randomised to upfront invasive coronary angiography.  
32  
33 350 Typically, non invasive tests perform well in low risk populations because of a negative  
34  
35 351 predictive value which is usually better than the positive predictive value. However, the  
36  
37 352 patient risk profile was relatively high in our study, and despite this there was no significant  
38  
39 353 difference between an initial functional or anatomic approach.  
40

41 354

42  
43 355 There are several reasons why initial angiography may not have led to clear benefit in our  
44  
45 356 study. Firstly, although angiography has stood at the heart of the diagnostic chest pain  
46  
47 357 pathway, the traditional binary cut-off values of 50% or 70% percentage stenosis by visual  
48  
49 358 estimation were shown in the FAME study to bear little relation to the true physiologic  
50  
51 359 significance of luminal narrowing <sup>(22)</sup>.  
52

53 360

54  
55  
56 361 Secondly, data from various countries suggest that not only is coronary angiography often  
57  
58 362 inappropriate when formally rated by expert observers <sup>(23) (24)</sup> but that disparate national or  
59  
60



1  
2  
3 363 regional rates of angiography do not translate into clear mortality benefits between countries  
4  
5 364 <sup>(25) (26) (27) (28)</sup> and on occasion may even demonstrate an inverse relationship <sup>(29)</sup>.

6  
7 365 Contemporary US data from approximately 500,000 PCI procedures collected prospectively  
8  
9 366 in the National Cardiovascular Data Registry demonstrated that, of 145,000 elective PCI  
10  
11 367 cases, roughly 12% were judged inappropriate. Furthermore, the rate of inappropriate  
12  
13 368 elective PCI between hospital sites ranged from 0-55% suggesting significant variability in  
14  
15 369 practice <sup>(30)</sup>. The data suggest a better way of selecting patients for invasive investigation is  
16  
17 370 needed.  
18

19 371  
20  
21 372 Ischemia-driven revascularisation has been shown to be of benefit in a number of trials,  
22  
23 373 most recently in the FAME study in which an invasive method of measuring the flow reserve  
24  
25 374 of the microcirculation (Fractional Flow Reserve, FFR) was used to allocate patients to  
26  
27 375 intervention or observation vs a clinical decision on intervention based on angiography alone  
28  
29 376 <sup>(31)</sup>. At 2 years follow up there were clear survival and MACE benefits to the FFR-based  
30  
31 377 approach.  
32

33  
34 378  
35 379 The ACRE study reported that, up to 6 years after diagnosis, medical management was a  
36  
37 380 more cost-effective strategy for angina compared with PCI <sup>(32)</sup>. The lack of evidence for  
38  
39 381 survival from revascularisation was also seen in the COURAGE trial <sup>(4)</sup>. Critics have  
40  
41 382 suggested this may be because randomization to PCI versus optimal medical therapy was  
42  
43 383 made *after* coronary angiography had been performed, potentially leading to a recruitment  
44  
45 384 bias of patients with less severe disease. In the CECaT trial this bias was avoided by  
46  
47 385 randomization to a management strategy defined by the non-invasive test result for each of  
48  
49 386 the 3 functional arms of the trial. In a relatively high risk population, we demonstrated no  
50  
51 387 clinically significant survival or economic detriment from using non-invasive imaging as a  
52  
53 388 gate-keeper to catheterization. Similarly, quality of life was not significantly different across  
54  
55 389 all four groups and these differences extended to a warranty period of at least 3 years.  
56

57  
58 390  
59  
60

1  
2  
3 391 We did observe a marginal decrease in survival in the CMR arm. The reasons for the  
4  
5 392 difference are unclear but do not relate to patient characteristics or management with CABG  
6  
7 393 or PCI. Although statistically significant, the mean survival difference from the other groups  
8  
9 394 was only 4 weeks over 3 years and is unlikely to be clinically meaningful. Since recent work  
10  
11 395 has established a strong correspondence between FFR measurements and stress CMR  
12  
13 396 perfusion indices it would be surprising if CMR were genuinely inferior to other modalities for  
14  
15 397 risk stratification<sup>(33)</sup>. Indeed several recent publications have highlighted the incremental  
16  
17 398 prognostic data (above that obtained from clinical variables) derived from several thousand  
18  
19 399 perfusion CMR studies<sup>(34) (35)</sup>.

20  
21 400

22  
23 401 Given the recent publication of the CEMARC trial<sup>(36)</sup> in which a clear diagnostic superiority  
24  
25 402 was demonstrated for stress CMR over SPECT, it is interesting that our data nonetheless  
26  
27 403 show an equivalence in functional health status between those randomized to SPECT  
28  
29 404 versus CMR in the CECaT trial. The implication may be that although CMR detects the  
30  
31 405 presence of *any* ischemia with a greater sensitivity it is the *overall burden* of ischemia that  
32  
33 406 alters a patient's prognosis. As such, it has not yet been demonstrated that the higher  
34  
35 407 diagnostic accuracy of CMR translates into better long-term patient outcomes – a fact  
36  
37 408 acknowledged by Greenwood et al subsequent to CEMARC's publication<sup>(37)</sup>. In this context  
38  
39 409 the CECaT nuclear results are congruent with numerous past publications and reconfirm the  
40  
41 410 reassuring warranty period of a normal SPECT study.

42  
43 411

#### 44 45 412 **Cost effectiveness**

46  
47 413 There was no significant difference in cost-effectiveness between the angiography -as-  
48  
49 414 default group and the non-invasive test groups up to 3 years, perhaps relating to the higher-  
50  
51 415 than-anticipated rate of referral for angiography after negative functional tests. Protocol  
52  
53 416 deviation of this kind is not infrequent in trials of non-invasive technology. In the recent  
54  
55 417 PARR-2 study of patients undergoing fluorodeoxyglucose positron emission tomography for  
56  
57 418 the assessment of viability, roughly 25 % of the study population did not adhere to protocol  
58  
59  
60

1  
2  
3 419 <sup>(38)</sup>. The willingness of a cardiologist to defer referral for coronary angiography in the face of  
4  
5 420 a normal non-invasive study may in part reflect individual prejudices and job description  
6  
7 421 (interventional versus non-invasive) as demonstrated in a recent survey of cardiology  
8  
9 422 attitudes <sup>(39)</sup> and was also reflected in our own data.

10  
11 423

12  
13 424 In CECaT, 20-25% of patients receiving a non-invasive test did not go on to have  
14  
15 425 angiography. A proportion of the additional cost in the non-invasive arms related to  
16  
17 426 angiography and PCI in the patients with a *negative* test, although only very few  
18  
19 427 subsequently required CABG - a robust marker of significant disease - during follow-up. This  
20  
21 428 readiness to employ PCI in a group in whom the indication/benefit is debatable was also  
22  
23 429 seen in the ACRE trial <sup>(32)</sup> and reflects understandable clinical response to uncertainty but  
24  
25 430 also the easy access to PCI in healthcare systems without barriers to self-referral <sup>(40)</sup>.

26  
27 431 Similarly, studies from the US have demonstrated a greater willingness to use coronary  
28  
29 432 angiography when available 'on site' as is increasingly seen even in small-to-medium sized  
30  
31 433 hospitals <sup>(41) (42) (43)</sup>.

32  
33 434

### 34 35 435 ***Cost effectiveness of each non-invasive technique***

36  
37 436

38  
39 437 Nuclear myocardial perfusion imaging

40  
41 438

42  
43 439 The END study used propensity matching to compare a large cohort of patients referred for  
44  
45 440 either gate-keeper myocardial perfusion imaging or upfront angiography – this non  
46  
47 441 randomised study demonstrated a significant cost reduction in the <sup>(44)</sup> nuclear arm. In  
48  
49 442 contrast to this and other work <sup>(45) (46) (47)</sup> we were unable to show a significant difference in  
50  
51 443 cost effectiveness in our own study. To some extent this reflected the participating physician  
52  
53 444 bias towards angiography during the period of trial recruitment (2001-2006) with many  
54  
55 445 patients referred for angiography despite normal perfusion studies. This continues in the  
56  
57 446 contemporary era with Chan et al demonstrating that almost 80% of Delphi-adjudicated  
58  
59  
60

1  
2  
3 447 inappropriate elective PCIs were performed following either low risk ischemia imaging in  
4  
5 448 mildly symptomatic patients or intermediate risk imaging in entirely asymptomatic patients  
6  
7 449 <sup>(30)</sup>.

8  
9 450

10  
11 451 In the CECaT study, when PCI was performed despite a negative initial non-invasive test,  
12  
13 452 this occurred because subsequent angiography indicated 'significant' stenosis. This was a  
14  
15 453 clinical judgment based on 'eyeball assessment' of lesion severity as has been reported in  
16  
17 454 clinical trials with angiographic end points <sup>(48)</sup>. However, the severity and functional  
18  
19 455 significance of many stenoses may be over-called, even by quantitative assessment, when  
20  
21 456 compared with physiological assessment of fractional flow reserve across the lesion <sup>(49) (50)</sup>.

22  
23 457 Further improvement in cost-effectiveness could likely have been achieved in the nuclear  
24  
25 458 arm of the trial. Our post-trial practice is to perform the stress SPECT first - and if this is  
26  
27 459 negative - cancel the rest test, likely augmenting the relative cost-effectiveness of SPECT  
28  
29 460 <sup>(51)</sup>.

30  
31 461

32  
33 462 CMR

34  
35 463 There are relatively few data available regarding the cost effectiveness of CMR . One recent  
36  
37 464 mathematical modelling study estimated that CMR likely has greater cost effectiveness/utility  
38  
39 465 compared to SPECT despite greater base case cost of the former <sup>(52)</sup>. The economic  
40  
41 466 superiority of CMR was also recently described by the CEMARC group, although  
42  
43 467 interestingly the base case costs employed for CMR and SPECT in their analysis differed by  
44  
45 468 only a few pounds. Their own sensitivity analysis in fact demonstrated that if the costs of the  
46  
47 469 two tests varied by more than 100 pounds (which was the case in our study) then in fact – as  
48  
49 470 we found - SPECT became the dominant strategy in a low-to-intermediate risk population.

50  
51 471 <sup>(53)</sup>

52  
53 472

54  
55 473 Stress echo

1  
2  
3 474 Stress echocardiography may be a more cost-effective strategy than angiography for men  
4  
5 475 aged 50-60 with CAD prevalence of 50%<sup>(54), (47)</sup>. There is also some evidence that stress  
6  
7 476 echo is more cost-effective than SPECT as an initial test <sup>(55) (56)</sup>, especially in women with  
8  
9 477 suspected CAD <sup>(57)</sup>. A similar benefit was not seen in our study probably because of the high  
10  
11 478 disease prevalence in our population. The lack of superiority of either stress  
12  
13 479 echocardiography or a combined strategy of exercise testing and stress echo compared to  
14  
15 480 upfront catheterisation was also evident in a recent Polish study of 600 patients with a  
16  
17 481 similar age, gender and disease prevalence to our own study population <sup>(58)</sup>.  
18  
19 482

20  
21 483 Taken overall, our data clearly demonstrate a limited future role for cost-effective non-  
22  
23 484 invasive imaging if referring physicians are not willing to accept a negative result as ground  
24  
25 485 truth. This might be interpreted as reflecting a need for greater physician education since we  
26  
27 486 showed a clear difference in onward referral rates for angiography after a negative test  
28  
29 487 between interventional and non-invasive cardiologists.  
30  
31 488

### 32 33 489 ***Clinical effectiveness***

34  
35 490 We demonstrated that SPECT can obviate the need for coronary angiography for a  
36  
37 491 significant number of patients without any clinical detriment. In the stress echo group clinical  
38  
39 492 outcomes were also comparable to the angiography subgroup at 18 months. The CMR  
40  
41 493 group had statistically marginally poorer survival and this follows our earlier finding that CMR  
42  
43 494 patients had significantly worse exercise tolerance at 18 months after randomisation <sup>(10)</sup>. This  
44  
45 495 is difficult to explain on the basis of Pryor risk score or other baseline clinical variables.  
46  
47 496 However, the mean difference in survival between the CMR arm and the other groups was  
48  
49 497 only 4 weeks and thus of marginal clinical significance. More importantly, the CMR group  
50  
51 498 were not otherwise disadvantaged – compared to the angiographic control group - with  
52  
53 499 respect to major adverse events, other resource use, or quality of life.  
54  
55 500

### 56 57 58 501 ***Limitations***

59  
60

1  
2  
3 502 This study was carried out in a single specialist cardiothoracic centre with a significant  
4  
5 503 proportion of high risk, predominantly white European, male patients. Those eligible who  
6  
7 504 refused the trial were older and were more likely to be women.  
8

9 505

10  
11 506 Survival data from the national registry did not include cause of death so that deaths due to  
12  
13 507 cardiovascular causes could not be reported separately.  
14

15 508

16  
17 509 The trial completed recruitment in 2004 and we used the technology that was available to us  
18

19 510 at the onset of the trial. At that time, we were not able to use attenuation correction for  
20

21 511 SPECT imaging; however this was also not used in the much more recent CEMARC trial<sup>(36)</sup>.  
22

23 512 Similarly, we performed our CMR exams in a mobile facility on a 1.5T scanner with only  
24

25 513 modest coil technology and limited temporal and anatomic coverage that would compare  
26

27 514 unfavourably with the 3T whole heart high resolution perfusion studies available today.  
28

29 515

30  
31 516 The trial aimed to reflect the strategy of using non-invasive imaging as a gateway to  
32

33 517 angiography in *contemporary clinical practice*. The test results were considered in  
34

35 518 conjunction with other information available at the time. Thus it was not the aim to formally  
36

37 519 assess diagnostic accuracy of the non-invasive tests in this context. This trial-based study  
38

39 520 was limited to 3 year cost-effectiveness follow up - longer-term economic models would  
40

41 521 provide lifetime estimates of the cost-effectiveness of the non-invasive strategies and could  
42

43 522 include advances in imaging technology.  
44

45 523

## 46 47 524 **Conclusions**

48  
49 525 We have demonstrated in the CECaT trial that stress echo, stress CMR and stress SPECT  
50

51 526 may each be used to defer invasive coronary angiography without clinical detriment or  
52

53 527 significant excess costs in an outpatient population with stable chest pain.  
54

55 528

56  
57 529  
58  
59  
60

1  
2  
3 530 **Acknowledgements**  
4

5 531

6  
7 532 The original CECaT study was funded by a grant from the UK National Health Service R&D  
8  
9 533 Health Technology Assessment Program (project no. 99/26/04). HT, CJ and LDS were  
10  
11 534 supported by the Medical Research Council [Programme number U015232027].  
12

13 535

14  
15 536 **Competing interests**  
16

17 537

18  
19 538 All authors have completed the ICMJE uniform disclosure form at  
20  
21 539 [http://www.icmje.org/coi\\_disclosure.pdf](http://www.icmje.org/coi_disclosure.pdf) and declare: support from the UK National Health  
22  
23 540 Service R&D Health Technology Assessment Program (project no. 99/26/04) and the UK  
24  
25 541 Medical Research Council [Programme number U015232027] for the submitted work ; no  
26  
27 542 financial relationships with any organisations that might have an interest in the submitted  
28  
29 543 work in the previous three years; no other relationships or activities that could appear to  
30  
31 544 have influenced the submitted work  
32

33 545 **Exclusive licence statement**  
34

35 546

36  
37 547 The Corresponding Author has the right to grant on behalf of all authors and does grant on  
38  
39 548 behalf of all authors, an exclusive licence (or non exclusive for government employees) on a  
40  
41 549 worldwide basis to the BMJ Publishing Group Ltd and its Licensees to permit this article (if  
42  
43 550 accepted) to be published in BMJ editions and any other BMJ PGL products and sublicences  
44  
45 551 to exploit all subsidiary rights, as set out in our licence  
46  
47 552 (<http://resources.bmj.com/bmj/authors/checklists-forms/licence-for-publication>).  
48

49 553

50  
51  
52 554 **Contributorship statement**  
53

54 555

55  
56 556 HT performed literature review, data analysis and interpretation; NW was involved in image  
57  
58 557 analysis, drafting the manuscript and critical revision; VH was involved in recruiting the  
59  
60

1  
2  
3 558 patients, data management, administering health questionnaires, data analysis and drafting  
4  
5 559 the manuscript; MD and MB were responsible for data analysis, health economic  
6  
7 560 assessment, drafting the manuscript and critical revision; LDS was responsible for study  
8  
9 561 design, trial management, statistical analysis, drafting the manuscript and critical revision;  
10  
11 562 CJ performed statistical and health economic analysis, drafting the manuscript and critical  
12  
13 563 revision; AMC was involved in study design, patient recruitment, image interpretation, trial  
14  
15 564 management, drafting the manuscript and critical revision and is the overall guarantor of  
16  
17 565 manuscript integrity.

18  
19 566

20  
21 567 All authors have read the manuscript in its submitted form and have provided final approval  
22  
23 568 for publication.

24  
25 569

26  
27 570 **Contributorship statement:**

28  
29 571

30  
31 572 HT, MD, MB, LDS, CHJ were involved in economic and statistical analysis. LDS was the  
32  
33 573 senior project statistician, was involved in original study design and takes overall  
34  
35 574 responsibility for statistical portion of the manuscript. All of these individuals contributed to  
36  
37 575 drafting and revision of the manuscript.

38  
39 576

40  
41 577 VH was involved in study design, patient recruitment, data collection and project  
42  
43 578 management from the project's inception to its conclusion. She also contributed to drafting  
44  
45 579 and revision of the manuscript

46  
47 580

48  
49 581 NW was responsible for blinded review of clinical data and contributed to drafting and  
50  
51 582 revision of the manuscript.

52  
53 583

54  
55 584 AC was involved in the original study design, was responsible for the day-to-day clinical  
56  
57 585 aspects of running the trial and was involved in the recruitment and follow up of patients as  
58  
59  
60



1  
2  
3 586 well as analysis of the cardiac MR studies. He wrote the final manuscript and contributed to  
4  
5 587 its revision. He takes overall responsibility for the integrity of the clinical data.

6  
7 588

8  
9 589 ***Data sharing statement:***

10  
11 590 There are no additional data available  
12  
13  
14  
15  
16  
17  
18  
19  
20  
21  
22  
23  
24  
25  
26  
27  
28  
29  
30  
31  
32  
33  
34  
35  
36  
37  
38  
39  
40  
41  
42  
43  
44  
45  
46  
47  
48  
49  
50  
51  
52  
53  
54  
55  
56  
57  
58  
59  
60

591 **Table 1 Baseline characteristics\***

|                                                      | Angiography  | SPECT        | Cardiac MRI  | Stress Echo  |
|------------------------------------------------------|--------------|--------------|--------------|--------------|
| Demographics                                         | (n=222)      | (n=224)      | (n=226)      | (n=226)      |
| Mean (SD) age (years)                                | 60.7 (9.1)   | 62.1 (9.5)   | 62.2 (9.0)   | 61.9 (9.9)   |
| Males (%)                                            | 149 (67%)    | 157 (70%)    | 153 (68%)    | 160 (71%)    |
| History/risk factors                                 |              |              |              |              |
| Previous MI (%)                                      | 63 (28%)     | 52 (23%)     | 69 (31%)     | 59 (26%)     |
| Previous CVA (%)                                     | 10 (5%)      | 13 (6%)      | 8 (4%)       | 12 (5%)      |
| Diabetes(%)                                          |              |              |              |              |
| IDDM                                                 | 12 (5%)      | 8 (4%)       | 11 (5%)      | 5 (2%)       |
| NIDDM                                                | 16 (7%)      | 18 (8%)      | 21 (9%)      | 22 (10%)     |
| Family history CAD                                   | 60 (27%)     | 55 (25%)     | 63 (28%)     | 59 (26%)     |
| Smoking history (%)                                  |              |              |              |              |
| <25 pack years                                       | 149 (67%)    | 162 (72%)    | 148 (65%)    | 155 (69%)    |
| >=25 pack years                                      | 73 (33%)     | 62 (28%)     | 78 (35%)     | 71 (31%)     |
| Treated hyperlipidaemia                              | 164 (74%)    | 171 (76%)    | 179 (79%)    | 179 (79%)    |
| (%)                                                  |              |              |              |              |
| Treated hypertension (%)                             | 117 (53%)    | 132 (59%)    | 115 (51%)    | 129 (57%)    |
| Exercise tolerance using the modified Bruce protocol |              |              |              |              |
| Mean (SD) total exercise time (mins)                 | 11.29 (4.56) | 10.46 (4.41) | 10.43 (4.43) | 10.89 (4.36) |
| ECG changes on exercise test                         |              |              |              |              |
| 1-2 mm ST depression with symptoms                   | 53 (24%)     | 43 (19%)     | 54 (24%)     | 57 (25%)     |
| >= 2mm ST depression without symptoms                | 16 (7%)      | 24 (11%)     | 20 (9%)      | 24 (11%)     |

|                           |           |           |           |           |
|---------------------------|-----------|-----------|-----------|-----------|
| ST elevation**/ no change | 153 (69%) | 157 (70%) | 152 (67%) | 145 (64%) |
| CCS class                 |           |           |           |           |
| 0-I                       | 60 (27%)  | 54 (24%)  | 78 (35%)  | 58 (26%)  |
| II                        | 138 (62%) | 144 (64%) | 122 (54%) | 132 (58%) |
| III-IV                    | 24 (11%)  | 26 (12%)  | 26 (11%)  | 36 (16%)  |

592 \* There were no significant differences between the groups in any variable

593 \*\* ST elevation was observed in 3 angiography, 2 CMR and 1 ECHO patients.

594 **Table 2 Cost-effectiveness summaries to 3 years post randomization**

595

|                            | Angiography<br>(n=222) | SPECT (n=224) | Cardiac MRI<br>(n=226) | Stress Echo<br>(n=226) |
|----------------------------|------------------------|---------------|------------------------|------------------------|
| Hazard ratio for death     | Baseline               | 0.99          | 2.60                   | 1.42                   |
| (95%CI)                    |                        | (0.35,2.85)   | (1.09,6.22)            | (0.54,3.74)            |
| Mean survival (years)      | 2.96                   | 2.95          | 2.90                   | 2.94                   |
| (95%CI)                    | (2.92, 2.99)           | (2.90, 2.99)  | (2.83, 2.95)           | (2.89, 2.97)           |
| Mean difference vs. CA     | -                      | -0.01         | -0.06                  | -0.02                  |
| (95%CI)                    | -                      | (-0.07,0.05)  | (-0.14, 0.01)          | (-0.08, 0.04)          |
| Mean QALYs                 | 2.24                   | 2.27          | 2.18                   | 2.27                   |
| (95%CI)                    | (2.16,2.31)            | (2.20,2.33)   | (2.11,2.25)            | (2.19,2.33)            |
| Mean difference vs. CA     | -                      | 0.03          | -0.05                  | 0.03                   |
| (95%CI)                    | -                      | (-5.21,1.38)  | (-5.21,1.38)           | (-3.04,4.21)           |
| Mean discounted costs      | 5243                   | 4644          | 4947                   | 5530                   |
| (£)                        |                        |               |                        |                        |
| (95%CI)                    | (4282,6461)            | (4194,5126)   | (4480,5431)            | (4857, 6262)           |
| Mean difference vs. CA     | -                      | -599          | -296                   | 287                    |
| (95%CI)                    | -                      | (-1901,503)   | (-1603, 824)           | (-1109,<br>1537)       |
| Probability cost effective | -                      | 0.82          | 0.29                   | 0.55                   |
| at £20k per QALY           |                        |               |                        |                        |
| Probability cost effective | -                      | 0.79          | 0.25                   | 0.59                   |
| at £30k per QALY           |                        |               |                        |                        |

596

597 **Table 2a Cost-effectiveness summaries for patients managed by interventional**  
 598 **cardiologists to 3 years post randomization**

599

|                                                | Angiography<br>(n=73) | SPECT<br>(n=96) | Cardiac MRI<br>(n=93) | Stress Echo<br>(n=98) |
|------------------------------------------------|-----------------------|-----------------|-----------------------|-----------------------|
| Mean survival (years)                          | 2.96                  | 2.97            | 2.89                  | 2.96                  |
| (95%CI)                                        | (2.91, 2.98)          | (2.93, 3.00)    | (2.80, 2.97)          | (2.90, 2.98)          |
| Mean difference vs. CA                         | -                     | 0.01            | -0.07                 | 0                     |
| (95%CI)                                        | -                     | (-0.05,0.07)    | (-0.17, 0.02)         | (-0.07,0.05)          |
| Mean QALYs                                     | 2.25                  | 2.29            | 2.21                  | 2.2                   |
| (95%CI)                                        | (2.14,2.36)           | (2.19,2.38)     | (2.10,2.32)           | (2.10,2.29)           |
| Mean difference vs. CA                         | -                     | 0.03            | -0.04                 | -0.06                 |
| (95%CI)                                        | -                     | (-5.31,2.30)    | (-4.96,2.41)          | (-3.06,6.42)          |
| Mean discounted costs (£)                      | 5754                  | 5205            | 5307                  | 6329                  |
| (95%CI)                                        | (4651, 6941)          | (4475, 5979)    | (4610, 6032)          | (5120, 7713)          |
| Mean difference vs. CA                         | -                     | -549            | -447                  | 574                   |
| (95%CI)                                        |                       | (-1973, 799)    | (-1841, 897)          | (-1097, 2262)         |
| Probability cost effective<br>at £20k per QALY |                       | 0.72            | 0.42                  | 0.20                  |
| Probability cost effective<br>at £30k per QALY |                       | 0.70            | 0.39                  | 0.21                  |

600 **Table 2b Cost-effectiveness summaries for patients managed by non-interventional**  
 601 **cardiologists to 3 years post randomization**

602

|                                                | Angiography<br>(n=149) | SPECT<br>(n=128) | Cardiac MRI<br>(n=133) | Stress Echo<br>(n=128) |
|------------------------------------------------|------------------------|------------------|------------------------|------------------------|
| Mean survival (years)                          | 2.95                   | 2.93             | 2.9                    | 2.92                   |
| (95%CI)                                        | (2.89, 2.99)           | (2.85, 2.98)     | (2.81, 2.97)           | (2.85, 2.98)           |
| Mean difference vs. CA                         | -                      | -0.02            | -0.05                  | -0.03                  |
| (95%CI)                                        | -                      | (-0.11,0.06)     | (-0.15, 0.04)          | (-0.11, 0.05)          |
| Mean QALYs                                     | 2.23                   | 2.25             | 2.17                   | 2.31                   |
| (95%CI)                                        | (2.14,2.31)            | (2.16,2.33)      | (2.07,2.26)            | (2.22,2.40)            |
| Mean difference vs. CA                         | -                      | 0.02             | -0.06                  | 0.09                   |
| (95%CI)                                        | -                      | (-6.92,1.90)     | (-5.50,3.45)           | (-5.45,3.71)           |
| Mean discounted costs (£)                      | 4936                   | 4216             | 4723                   | 4780                   |
| (95%CI)                                        | (3681, 6665)           | (3635, 4799)     | (4068, 5381)           | (4136, 5467)           |
| Mean difference vs. CA                         | -                      | -719             | -212                   | -156                   |
| (95%CI)                                        |                        | (-2527, 695)     | (-2007, 1258)          | (-1990, 1353)          |
| Probability cost effective<br>at £20k per QALY |                        | 0.75             | 0.29                   | 0.85                   |
| Probability cost effective<br>at £30k per QALY |                        | 0.72             | 0.27                   | 0.86                   |

603

604

605 **Table 3 Summary adverse events during initial 18 months follow up\***

|                                           | Angiography | SPECT   | Cardiac MRI | Stress Echo |
|-------------------------------------------|-------------|---------|-------------|-------------|
| Adverse event                             | (n=222)     | (n=224) | (n=226)     | (n=226)     |
| Total adverse events                      | 38          | 34      | 44          | 62          |
| Chest pain (not<br>myocardial infarction) | 21          | 20      | 28          | 35          |
| Angina                                    | 7           | 5       | 4           | 3           |
| Myocardial infarction                     | 2           | 0       | 3           | 6           |

606 \* Note that beyond this time only events that required hospital admission were recorded.

607

608

609 **Table 4** Summary of the frequency of use of the main resource use elements during follow up  
 610 of up to 3 years (excluding initial diagnostic test)

611

| Resource use (unit cost)                   | Angiography<br>(n=222) | SPECT<br>(n=224) | Cardiac MRI<br>(n=226) | Stress Echo<br>(n=226) |
|--------------------------------------------|------------------------|------------------|------------------------|------------------------|
| CABG (£7195)                               | 28                     | 33               | 28                     | 34                     |
| PCI (£3660)                                | 57                     | 46               | 60                     | 62                     |
| Other hospital admission<br>(£467 per day) | 36                     | 29               | 28                     | 53                     |
| Angiography (£625)                         | 12                     | 183              | 175                    | 181                    |
| SPECT (£405)                               | 16                     | 3                | 3                      | 6                      |
| Cardiac MRI (£565)                         | 5                      | 5                | 12                     | 5                      |
| Echocardiography (£435)                    | 30                     | 17               | 24                     | 18                     |
| PET scan (£842)                            | 0                      | 3                | 0                      | 1                      |
| Preadmission clinic (£85)                  | 22                     | 21               | 27                     | 24                     |
| Follow up clinic (£85)                     | 19                     | 22               | 31                     | 21                     |
| Outpatient visits (£143)                   | 247                    | 270              | 300                    | 284                    |

612

613 \* Cardiac drugs were also included but are not shown here due to many different  
 614 combinations of drugs and doses prescribed.

615

616



1  
2  
3 617 **Figure Legends**

4  
5 618

6  
7 619 **Figure 1 CONSORT diagram describing recruitment and randomization**

8  
9 620

10  
11 621 **Figure 2 Kaplan-Meier survival estimates according to initial modality of diagnosis**

12  
13 622

14  
15 623 **Figure 3 Quality of life assessed by EQ5D over time**

16  
17 624

18  
19 625 **Figure 4 Bootstrapped estimates of the joint distribution of mean cost difference**

20  
21 626 **against mean QALY difference up to 3-years post randomisation**

22  
23 627

24  
25 628 **Figure 5 Estimated probability of being cost-effective compared with angiography**

26  
27 629 **alone against the amount (£) a health provider is willing to pay for one additional**

28  
29 630 **QALY**

30  
31 631

32  
33 632

34  
35 633

36  
37 634

38  
39 635

40  
41  
42  
43  
44  
45  
46  
47  
48  
49  
50  
51  
52  
53  
54  
55  
56  
57  
58  
59  
60

636 **References**

637

638 1. NICE. Myocardial perfusion scintigraphy for the diagnosis and management of  
639 angina and myocardial infarction: National Institute for Clinical Excellence 2003; Technology  
640 Appraisal Guidance 73.

641 2. Boden WE. Surgery, angioplasty, or medical therapy for symptomatic multivessel  
642 coronary artery disease: is there an indisputable "winning strategy" from evidence-based  
643 clinical trials? *Journal of the American College of Cardiology*. 2004;43(10):1752-4. Epub  
644 2004/05/18.

645 3. Coronary artery surgery study (CASS): a randomized trial of coronary artery bypass  
646 surgery. Quality of life in patients randomly assigned to treatment groups. *Circulation*.  
647 1983;68(5):951-60. Epub 1983/11/01.

648 4. Boden WE, O'Rourke RA, Teo KK, et al. Optimal medical therapy with or without PCI  
649 for stable coronary disease. *The New England journal of medicine*. 2007;356(15):1503-16.  
650 Epub 2007/03/28.

651 5. Patel MR, Peterson ED, Dai D, et al. Low diagnostic yield of elective coronary  
652 angiography. *The New England journal of medicine*. 2010;362(10):886-95. Epub  
653 2010/03/12.

654 6. Gibbons RJ, Balady GJ, Bricker JT, et al. ACC/AHA 2002 guideline update for  
655 exercise testing: summary article. A report of the American College of Cardiology/American  
656 Heart Association Task Force on Practice Guidelines (Committee to Update the 1997  
657 Exercise Testing Guidelines). *Journal of the American College of Cardiology*.  
658 2002;40(8):1531-40. Epub 2002/10/24.

659 7. Douglas PS, Khandheria B, Stainback RF, et al.  
660 ACCF/ASE/ACEP/AHA/ASNC/SCAI/SCCT/SCMR 2008 appropriateness criteria for stress  
661 echocardiography: a report of the American College of Cardiology Foundation  
662 Appropriateness Criteria Task Force, American Society of Echocardiography, American  
663 College of Emergency Physicians, American Heart Association, American Society of Nuclear  
664 Cardiology, Society for Cardiovascular Angiography and Interventions, Society of  
665 Cardiovascular Computed Tomography, and Society for Cardiovascular Magnetic  
666 Resonance endorsed by the Heart Rhythm Society and the Society of Critical Care  
667 Medicine. *Journal of the American College of Cardiology*. 2008;51(11):1127-47. Epub  
668 2008/03/18.

669 8. Hendel RC, Berman DS, Di Carli MF, et al.  
670 ACCF/ASNC/ACR/AHA/ASE/SCCT/SCMR/SNM 2009 Appropriate Use Criteria for Cardiac  
671 Radionuclide Imaging: A Report of the American College of Cardiology Foundation  
672 Appropriate Use Criteria Task Force, the American Society of Nuclear Cardiology, the  
673 American College of Radiology, the American Heart Association, the American Society of  
674 Echocardiography, the Society of Cardiovascular Computed Tomography, the Society for  
675 Cardiovascular Magnetic Resonance, and the Society of Nuclear Medicine. *Journal of the*  
676 *American College of Cardiology*. 2009;53(23):2201-29. Epub 2009/06/06.

677 9. Hundley WG, Bluemke DA, Finn JP, et al. ACCF/ACR/AHA/NASCI/SCMR 2010  
678 expert consensus document on cardiovascular magnetic resonance: a report of the

- 1  
2  
3 679 American College of Cardiology Foundation Task Force on Expert Consensus Documents.  
4 680 *Circulation*. 2010;121(22):2462-508. Epub 2010/05/19.
- 5  
6 681 10. Sharples L, Hughes V, Crean A, et al. Cost-effectiveness of functional cardiac testing  
7 682 in the diagnosis and management of coronary artery disease: a randomised controlled trial.  
8 683 The CECaT trial. *Health Technol Assess*. 2007;11(49):iii-iv, ix-115. Epub 2007/11/21.
- 9  
10 684 11. Pryor DB, Shaw L, McCants CB, et al. Value of the history and physical in identifying  
11 685 patients at increased risk for coronary artery disease. *Annals of internal medicine*.  
12 686 1993;118(2):81-90. Epub 1993/01/15.
- 13  
14 687 12. Seldinger SI. Catheter replacement of the needle in percutaneous arteriography; a  
15 688 new technique. *Acta radiologica*. 1953;39(5):368-76. Epub 1953/05/01.
- 16  
17 689 13. Scanlon PJ, Faxon DP, Audet AM, et al. ACC/AHA guidelines for coronary  
18 690 angiography. A report of the American College of Cardiology/American Heart Association  
19 691 Task Force on practice guidelines (Committee on Coronary Angiography). Developed in  
20 692 collaboration with the Society for Cardiac Angiography and Interventions. *Journal of the*  
21 693 *American College of Cardiology*. 1999;33(6):1756-824. Epub 1999/05/20.
- 22  
23  
24 694 14. Wackers FJ. Exercise myocardial perfusion imaging. *Journal of nuclear medicine* :  
25 695 official publication, Society of Nuclear Medicine. 1994;35(4):726-9. Epub 1994/04/01.
- 26  
27 696 15. Pennell DJ, Sechtem UP, Higgins CB, et al. Clinical indications for cardiovascular  
28 697 magnetic resonance (CMR): Consensus Panel report. *Journal of cardiovascular magnetic*  
29 698 *resonance* : official journal of the Society for Cardiovascular Magnetic Resonance.  
30 699 2004;6(4):727-65. Epub 2005/01/14.
- 31  
32 700 16. Reeder SB, Atalar E, Faranesh AZ, et al. Multi-echo segmented k-space imaging: an  
33 701 optimized hybrid sequence for ultrafast cardiac imaging. *Magnetic resonance in medicine* :  
34 702 official journal of the Society of Magnetic Resonance in Medicine / Society of Magnetic  
35 703 Resonance in Medicine. 1999;41(2):375-85. Epub 1999/03/18.
- 36  
37 704 17. Canet EP, Janier MF, Revel D. Magnetic resonance perfusion imaging in ischemic  
38 705 heart disease. *Journal of magnetic resonance imaging* : JMRI. 1999;10(3):423-33. Epub  
39 706 1999/10/03.
- 40  
41 707 18. Kind P. The EuroQol instrument: an index of health-related quality of life. In: Spiker  
42 708 B, editor. *Quality of life and pharmacoeconomics in clinical trials*. Philadelphia, PA:  
43 709 Lippincott-Raven; 1996.
- 44  
45  
46 710 19. Dolan P GC, Kind P. A social tariff for EuroQol: results from a UK general population  
47 711 survey 1995.
- 48  
49 712 20. Willan AR, Lin DY, Cook RJ, Chen EB. Using inverse-weighting in cost-effectiveness  
50 713 analysis with censored data. *Statistical methods in medical research*. 2002;11(6):539-51.  
51 714 Epub 2003/01/09.
- 52  
53 715 21. Efron B TR. *An introduction to the bootstrap*. San Francisco: Chapman and Hall;  
54 716 1993.
- 55  
56 717 22. Tonino PA, Fearon WF, De Bruyne B, et al. Angiographic versus functional severity  
57 718 of coronary artery stenoses in the FAME study fractional flow reserve versus angiography in

- 1  
2  
3 719 multivessel evaluation. *Journal of the American College of Cardiology*. 2010;55(25):2816-21.  
4 720 Epub 2010/06/29.
- 5  
6 721 23. Mozes B, Shabtai E. The appropriateness of performing coronary angiography in two  
7 722 major teaching hospitals in Israel. *International journal for quality in health care : journal of*  
8 723 *the International Society for Quality in Health Care / ISQua*. 1994;6(3):245-9. Epub  
9 724 1994/09/01.
- 10  
11 725 24. Gray D, Hampton JR. Methods of establishing criteria for purchasing coronary  
12 726 angiography in the investigation of chest pain. *Journal of public health medicine*.  
13 727 1994;16(4):399-405. Epub 1994/12/01.
- 14  
15 728 25. Guadagnoli E, Hauptman PJ, Ayanian JZ, et al. Variation in the use of cardiac  
16 729 procedures after acute myocardial infarction. *The New England journal of medicine*.  
17 730 1995;333(9):573-8. Epub 1995/08/31.
- 18  
19 731 26. Mark DB, Naylor CD, Hlatky MA, et al. Use of medical resources and quality of life  
20 732 after acute myocardial infarction in Canada and the United States. *The New England journal*  
21 733 *of medicine*. 1994;331(17):1130-5. Epub 1994/10/27.
- 22  
23 734 27. Rouleau JL, Moya LA, Pfeffer MA, et al. A comparison of management patterns after  
24 735 acute myocardial infarction in Canada and the United States. *The SAVE investigators*. *The*  
25 736 *New England journal of medicine*. 1993;328(11):779-84. Epub 1993/03/18.
- 26  
27 737 28. Tu JV, Pashos CL, Naylor CD, et al. Use of cardiac procedures and outcomes in  
28 738 elderly patients with myocardial infarction in the United States and Canada. *The New*  
29 739 *England journal of medicine*. 1997;336(21):1500-5. Epub 1997/05/22.
- 30  
31 740 29. Selby JV, Fireman BH, Lundstrom RJ, et al. Variation among hospitals in coronary-  
32 741 angiography practices and outcomes after myocardial infarction in a large health  
33 742 maintenance organization. *The New England journal of medicine*. 1996;335(25):1888-96.  
34 743 Epub 1996/12/19.
- 35  
36 744 30. Chan PS, Patel MR, Klein LW, et al. Appropriateness of percutaneous coronary  
37 745 intervention. *JAMA : the journal of the American Medical Association*. 2011;306(1):53-61.  
38 746 Epub 2011/07/07.
- 39  
40 747 31. Pijls NH, Fearon WF, Tonino PA, et al. Fractional flow reserve versus angiography  
41 748 for guiding percutaneous coronary intervention in patients with multivessel coronary artery  
42 749 disease: 2-year follow-up of the FAME (Fractional Flow Reserve Versus Angiography for  
43 750 Multivessel Evaluation) study. *Journal of the American College of Cardiology*.  
44 751 2010;56(3):177-84. Epub 2010/06/12.
- 45  
46 752 32. Griffin SC, Barber JA, Manca A, et al. Cost effectiveness of clinically appropriate  
47 753 decisions on alternative treatments for angina pectoris: prospective observational study.  
48 754 *BMJ*. 2007;334(7594):624. Epub 2007/03/07.
- 49  
50 755 33. Watkins S, McGeoch R, Lyne J, et al. Validation of magnetic resonance myocardial  
51 756 perfusion imaging with fractional flow reserve for the detection of significant coronary heart  
52 757 disease. *Circulation*. 2009;120(22):2207-13. Epub 2009/11/18.
- 53  
54  
55  
56  
57  
58  
59  
60

- 1  
2  
3 758 34. Krittayaphong R, Chaithiraphan V, Maneesai A, et al. Prognostic value of combined  
4 759 magnetic resonance myocardial perfusion imaging and late gadolinium enhancement. The  
5 760 international journal of cardiovascular imaging. 2011;27(5):705-14. Epub 2011/04/12.  
6  
7 761 35. Bingham SE, Hachamovitch R. Incremental prognostic significance of combined  
8 762 cardiac magnetic resonance imaging, adenosine stress perfusion, delayed enhancement,  
9 763 and left ventricular function over preimaging information for the prediction of adverse events.  
10 764 Circulation. 2011;123(14):1509-18. Epub 2011/03/30.  
11  
12 765 36. Greenwood JP, Maredia N, Younger JF, et al. Cardiovascular magnetic resonance  
13 766 and single-photon emission computed tomography for diagnosis of coronary heart disease  
14 767 (CE-MARC): a prospective trial. Lancet. 2012;379(9814):453-60. Epub 2011/12/27.  
15  
16 768 37. Greenwood JP. CMR versus SPECT for diagnosis of coronary heart disease –  
17 769 Authors' reply The Lancet. 2012;379(9832):2147 - 8.  
18  
19 770 38. Beanlands RS, Nichol G, Huszti E, et al. F-18-fluorodeoxyglucose positron emission  
20 771 tomography imaging-assisted management of patients with severe left ventricular  
21 772 dysfunction and suspected coronary disease: a randomized, controlled trial (PARR-2).  
22 773 Journal of the American College of Cardiology. 2007;50(20):2002-12. Epub 2007/11/13.  
23  
24 774 39. Maron DJ, Stone GW, Berman DS, et al. Is cardiac catheterization necessary before  
25 775 initial management of patients with stable ischemic heart disease? Results from a Web-  
26 776 based survey of cardiologists. American heart journal. 2011;162(6):1034-43 e13. Epub  
27 777 2011/12/06.  
28  
29 778 40. Nallamotheu BK, Rogers MA, Chernew ME, et al. Opening of specialty cardiac  
30 779 hospitals and use of coronary revascularization in medicare beneficiaries. JAMA : the journal  
31 780 of the American Medical Association. 2007;297(9):962-8. Epub 2007/03/08.  
32  
33 781 41. Feit F, Mueller HS, Braunwald E, et al. Thrombolysis in Myocardial Infarction (TIMI)  
34 782 phase II trial: outcome comparison of a "conservative strategy" in community versus tertiary  
35 783 hospitals. The TIMI Research Group. Journal of the American College of Cardiology.  
36 784 1990;16(7):1529-34. Epub 1990/12/01.  
37  
38 785 42. Blustein J. High-technology cardiac procedures. The impact of service availability on  
39 786 service use in New York State. JAMA : the journal of the American Medical Association.  
40 787 1993;270(3):344-9. Epub 1993/07/21.  
41  
42 788 43. Every NR, Larson EB, Litwin PE, et al. The association between on-site cardiac  
43 789 catheterization facilities and the use of coronary angiography after acute myocardial  
44 790 infarction. Myocardial Infarction Triage and Intervention Project Investigators. The New  
45 791 England journal of medicine. 1993;329(8):546-51. Epub 1993/08/19.  
46  
47 792 44. Shaw LJ, Hachamovitch R, Berman DS, et al. The economic consequences of  
48 793 available diagnostic and prognostic strategies for the evaluation of stable angina patients: an  
49 794 observational assessment of the value of precatheterization ischemia. Economics of  
50 795 Noninvasive Diagnosis (END) Multicenter Study Group. Journal of the American College of  
51 796 Cardiology. 1999;33(3):661-9. Epub 1999/03/18.  
52  
53 797 45. Mowatt G, Vale L, Brazzelli M, et al. Systematic review of the effectiveness and cost-  
54 798 effectiveness, and economic evaluation, of myocardial perfusion scintigraphy for the  
55  
56  
57  
58  
59  
60



- 1  
2  
3 799 diagnosis and management of angina and myocardial infarction. *Health Technol Assess.*  
4 800 2004;8(30):iii-iv, 1-207. Epub 2004/07/14.
- 5  
6 801 46. Underwood SR, Godman B, Salyani S, et al. Economics of myocardial perfusion  
7 802 imaging in Europe--the EMPIRE Study. *European heart journal.* 1999;20(2):157-66. Epub  
8 803 1999/04/01.
- 9  
10 804 47. Underwood SR, Shaw LJ, Anagnostopoulos C, et al. Myocardial perfusion  
11 805 scintigraphy and cost effectiveness of diagnosis and management of coronary heart  
12 806 disease. *Heart.* 2004;90 Suppl 5:v34-6. Epub 2004/07/16.
- 13  
14 807 48. Uchida T, Popma J, Stone GW, et al. The clinical impact of routine angiographic  
15 808 follow-up in randomized trials of drug-eluting stents: a critical assessment of "oculostenotic"  
16 809 reintervention in patients with intermediate lesions. *JACC Cardiovascular interventions.*  
17 810 2010;3(4):403-11. Epub 2010/04/20.
- 18  
19 811 49. Christou MA, Siontis GC, Katritsis DG, et al. Meta-analysis of fractional flow reserve  
20 812 versus quantitative coronary angiography and noninvasive imaging for evaluation of  
21 813 myocardial ischemia. *The American journal of cardiology.* 2007;99(4):450-6. Epub  
22 814 2007/02/13.
- 23  
24 815 50. Gould KL. Does coronary flow trump coronary anatomy? *JACC Cardiovascular*  
25 816 *imaging.* 2009;2(8):1009-23. Epub 2009/08/15.
- 26  
27 817 51. Chang SM, Nabi F, Xu J, et al. Normal stress-only versus standard stress/rest  
28 818 myocardial perfusion imaging: similar patient mortality with reduced radiation exposure.  
29 819 *Journal of the American College of Cardiology.* 2010;55(3):221-30. Epub 2009/11/17.
- 30  
31 820 52. Boldt J, Leber AW, Bonaventura K, et al. Cost-effectiveness of cardiovascular  
32 821 magnetic resonance and single-photon emission computed tomography for diagnosis of  
33 822 coronary artery disease in Germany. *Journal of cardiovascular magnetic resonance : official*  
34 823 *journal of the Society for Cardiovascular Magnetic Resonance.* 2013;15:30. Epub  
35 824 2013/04/12.
- 36  
37 825 53. Walker S, Girardin F, McKenna C, et al. Cost-effectiveness of cardiovascular  
38 826 magnetic resonance in the diagnosis of coronary heart disease: an economic evaluation  
39 827 using data from the CE-MARC study. *Heart.* 2013;99(12):873-81. Epub 2013/04/18.
- 40  
41 828 54. Kuntz KM, Fleischmann KE, Hunink MG, et al. Cost-effectiveness of diagnostic  
42 829 strategies for patients with chest pain. *Annals of internal medicine.* 1999;130(9):709-18.  
43 830 Epub 1999/06/05.
- 44  
45 831 55. Hayashino Y, Nagata-Kobayashi S, Morimoto T, et al. Cost-effectiveness of  
46 832 screening for coronary artery disease in asymptomatic patients with Type 2 diabetes and  
47 833 additional atherogenic risk factors. *Journal of general internal medicine.* 2004;19(12):1181-  
48 834 91. Epub 2004/12/22.
- 49  
50 835 56. Tan SS, Oppe M, Zoet-Nugteren SK, et al. A microcosting study of diagnostic tests  
51 836 for the detection of coronary artery disease in The Netherlands. *European journal of*  
52 837 *radiology.* 2009;72(1):98-103. Epub 2008/08/16.
- 53  
54  
55  
56  
57  
58  
59  
60

1  
2  
3 838 57. Kim C, Kwok YS, Saha S, et al. Diagnosis of suspected coronary artery disease in  
4 839 women: a cost-effectiveness analysis. American heart journal. 1999;137(6):1019-27. Epub  
5 840 1999/05/29.

6  
7 841 58. Lewandowski M, Szwed H, Kowalik I. Searching for the optimal strategy for the  
8 842 diagnosis of stable coronary artery disease. Cost-effectiveness of the new algorithm.  
9 843 Cardiology journal. 2007;14(6):544-51. Epub 2008/07/25.

10  
11 844

12  
13  
14 845  
15 846

16  
17 847  
18  
19  
20  
21  
22  
23  
24  
25  
26  
27  
28  
29  
30  
31  
32  
33  
34  
35  
36  
37  
38  
39  
40  
41  
42  
43  
44  
45  
46  
47  
48  
49  
50  
51  
52  
53  
54  
55  
56  
57  
58  
59  
60

1  
2  
3  
4  
5  
6  
7  
8  
9  
10  
11  
12  
13  
14  
15  
16  
17  
18  
19  
20  
21  
22  
23  
24  
25  
26  
27  
28  
29  
30  
31  
32  
33  
34  
35  
36  
37  
38  
39  
40  
41  
42  
43  
44  
45  
46  
47  
48  
49  
50  
51  
52  
53  
54  
55  
56  
57  
58  
59  
60

**Title: Cost effectiveness of initial stress cardiovascular MR, stress SPECT or stress echocardiography as a gatekeeper test, compared to upfront invasive coronary angiography in the investigation and management of patients with stable chest pain: mid term outcomes from the CECaT\* randomised controlled trial**

\*Cost Effectiveness of non-invasive Cardiac Testing

Howard Thom MSc, Nicholas West MD, FRCP, Vikki Hughes PhD, Matthew Dyer MSc, Martin Buxton MSc, Linda D Sharples PhD, Christopher H Jackson PhD, Andrew M Crean MRCP, FRCR

**Affiliations:**

MRC Biostatistics Unit, Institute of Public Health, Cambridge CB2 0SR, UK, Howard Thom, biostatistician; Department of Cardiology, Papworth Hospital, Cambridge, CB23 3RE, UK Nicholas West, consultant cardiologist; Research and Development Office, Papworth Hospital, Cambridge, CB23 3RE , UK ,Vikki Hughes senior research analyst; Health Economics Research Group, Brunel University, Uxbridge, Middlesex UB8 3PH, UK, Matthew Dyer, research fellow; Health Economics Research Group, Brunel University, Uxbridge, Middlesex UB8 3PH, UK, Martin Buxton, professor; and Clinical Trials Research Unit, University of Leeds, West Yorkshire LS2 9JT, UK, Linda D Sharples, professor; MRC Biostatistics Unit, Institute of Public Health, Cambridge CB2 0SR, UK, Christopher H Jackson, senior statistician; Division of Cardiology, Toronto General Hospital, Toronto, M5G 2C4, Canada, Andrew M Crean, assistant professor of medicine & radiology.

**Corresponding author:** Dr Andrew Crean MRCP FRCR, Division of Cardiology, Toronto General Hospital, 585 University Avenue, Toronto, ON, Canada M5G 2C4

**Tel:** 1 416 340 4800 **Fax:** 1 888 502 6601 **Email:** [andrew.crean@uhn.ca](mailto:andrew.crean@uhn.ca)

**Clinical Trial registration:** ISRCTN 47108462, UKCRN 3696



1  
2  
3 30  
4

5 31 **The CECaT study group were:**

6  
7 32 Johanna Armstrong, Martin Buxton, Noreen Caine, Richard Coulden, Andrew Crean,

8  
9 33 Matthew Dyer, Margaret Gillham, Hester Goddard, Kim Goldsmith, Vikki Hughes, Evelyn

10  
11 34 Lee, Roger Patel, Peter Schofield, Linda Sharples, Emer Sonnex, David Stone, Carmen

12  
13 35 Treacy  
14  
15  
16  
17  
18  
19  
20  
21  
22  
23  
24  
25  
26  
27  
28  
29  
30  
31  
32  
33  
34  
35  
36  
37  
38  
39  
40  
41  
42  
43  
44  
45  
46  
47  
48  
49  
50  
51  
52  
53  
54  
55  
56  
57  
58  
59  
60

1  
2  
3 45 **Contributorship statement:**  
4  
5 46  
6

7 47 **HT, MD, MB, LDS, CHJ were involved in economic and statistical analysis. LDS was**  
8  
9 48 **the senior project statistician, was involved in original study design and takes overall**  
10  
11 49 **responsibility for statistical portion of the manuscript. All of these individuals**  
12  
13 50 **contributed to drafting and revision of the manuscript.**  
14

15 51  
16  
17 52 **VH was involved in study design, patient recruitment, data collection and project**  
18  
19 53 **management from the project's inception to its conclusion. She also contributed to**  
20  
21 54 **drafting and revision of the manuscript**  
22

23 55  
24  
25 56 **NW was responsible for blinded review of clinical data and contributed to drafting and**  
26  
27 57 **revision of the manuscript.**  
28

29 58  
30  
31 59 **AC was involved in the original study design, was responsible for the day-to-day**  
32  
33 60 **clinical aspects of running the trial and was involved in the recruitment and follow up**  
34  
35 61 **of patients as well as analysis of the cardiac MR studies. He wrote the final**  
36  
37 62 **manuscript and contributed to its revision. He takes overall responsibility for the**  
38  
39 63 **integrity of the clinical data.**  
40

41 64

42 65

43 66

44 67

45 68

46 69

47 70

48 71

49 72

1  
2  
3 73 **Article summary:**

4  
5 74 **Article focus:**

- 6  
7 75 1. Is non-invasive imaging a safe and appropriate gate-keeper to coronary  
8  
9 76 angiography in patients with stable chest pain ?
- 10  
11 77 2. Is there any difference in cost-effectiveness and cost-utility between the  
12  
13 78 different non-invasive approaches and conventional coronary angiography
- 14  
15 79 3. Are patients disadvantaged in any meaningful way by having a non-invasive  
16  
17 80 test to decide whether they should go forward for coronary angiography ?
- 18  
19 81 4. How does stress perfusion CMR compare to the more established tests of  
20  
21 82 SPECT-MIBI and stress echocardiography as a gate-keeper to coronary  
22  
23 83 angiography ?
- 24  
25  
26 84

27 85 **Key messages:**

- 28  
29 86 1. Non-invasive testing may be used safely as a gate-keeper to coronary  
30  
31 87 angiography in patients with stable chest pain without any material  
32  
33 88 disadvantage to them in terms of survival and quality of life up to 6 years after  
34  
35 89 initial randomisation.
- 36  
37 90 2. SPECT-MIBI appears marginally superior statistically to the other non-invasive  
38  
39 91 methods although clinically meaningful differences are small between all  
40  
41 92 strategies.
- 42  
43 93 3. Stress perfusion CMR appears to be an effective technique in a stable out-  
44  
45 94 patient population with undiagnosed chest pain.
- 46  
47  
48 95

49 96 **Strengths and limitations:**

- 50  
51 97 1. This is the only large randomised prospective trial of a strategy of non-invasive  
52  
53 98 gate-keeper cardiac imaging versus upfront angiography in the literature.
- 54  
55 99 2. The cost-utility data are derived from NHS tariffs and our results are not  
56  
57 100 necessarily directly transferrable to other healthcare systems
- 58  
59  
60

1  
2  
3  
4  
5  
6  
7  
8  
9  
10  
11  
12  
13  
14  
15  
16  
17  
18  
19  
20  
21  
22  
23  
24  
25  
26  
27  
28  
29  
30  
31  
32  
33  
34  
35  
36  
37  
38  
39  
40  
41  
42  
43  
44  
45  
46  
47  
48  
49  
50  
51  
52  
53  
54  
55  
56  
57  
58  
59  
60

101 ***Data sharing statement:***  
102 **There are no additional data available**

For peer review only

1  
2  
3 103 **Abstract**

4  
5 104 **Objectives:** to compare outcomes and cost effectiveness of various initial imaging strategies on  
6  
7 105 the management of stable chest pain in a long term prospective randomized trial.

8  
9 106 **Setting:** regional cardiothoracic referral center in the east of England

10  
11 107 **Participants:** 898 patients (69% male) entered the study with 869 alive at 2yr follow up.  
12  
13 108 Patients were included if they presented for assessment of stable chest pain with a positive  
14  
15 109 exercise test and no prior history of ischemic heart disease. Exclusion criteria were recent  
16  
17 110 infarction, unstable symptoms or any contra-indication to stress MRI.

18  
19 111 **Primary outcome measures:** The primary outcomes of this follow up study were survival up  
20  
21 112 to a minimum of 2 years post-treatment, quality-adjusted survival and cost-utility of each  
22  
23 113 strategy

24  
25 114 **Results:** 898 patients were randomized. Compared to angiography, mortality was  
26  
27 115 marginally higher in the groups randomized to CMR (hazard ratio 2.6, 95%CI 1.1, 6.2), but  
28  
29 116 similar in the SPECT-MIBI (hazard ratio 1.0, 95%CI 0.4, 2.9) and ECHO groups (hazard ratio  
30  
31 117 1.6, 95%CI 0.6, 4.0). Although SPECT-MIBI was marginally superior to other non-invasive  
32  
33 118 tests there were no other significant differences between the groups in mortality, quality  
34  
35 119 adjusted survival or costs.

36  
37 120 **Conclusions:** Non-invasive cardiac imaging can be used safely as the initial diagnostic test  
38  
39 121 to diagnose CAD without adverse effects on patient outcomes or increased costs, relative to  
40  
41 122 angiography. These results should be interpreted in the context of recent advances in  
42  
43 123 imaging technology.

44  
45 124 **Trial registration:** ISRCTN 47108462, UKCRN 3696

46  
47 125 **Key words:** MRI, cardiovascular magnetic resonance, comparative effectiveness, SPECT,  
48  
49 126 stress echo, coronary angiography  
50  
51  
52  
53  
54  
55  
56  
57  
58  
59  
60

## 127 **Introduction**

128

129 CAD is common and its management is costly<sup>(1)</sup>. Revascularisation using bypass surgery  
130 (CABG) or percutaneous coronary intervention (PCI) is effective for patients with severe  
131 disease<sup>(2)</sup> but a significant minority of patients do not gain symptomatic relief<sup>(3)</sup>. Data from  
132 the COURAGE trial did not show prognostic benefit from revascularization in any patient  
133 subgroup<sup>(4)</sup>. The yield of coronary angiography is variable with one recent large study of  
134 nearly 400, 000 patients demonstrating a normalcy rate approaching 40%<sup>(5)</sup>. Therefore  
135 non-invasive testing to identify those with a low likelihood of obstructive CAD may be safer,  
136 cheaper and more appropriate than upfront angiography. This approach is codified in  
137 multiple AHA/ACC guidelines on the investigation of stable or suspected angina pectoris in  
138 which initial non-invasive imaging is rated as highly appropriate<sup>(6) (7) (8) (9)</sup>.

139

140 The 'Cost-Effectiveness of non-invasive **Cardiac Testing**' (**CECaT**) trial was an unblinded  
141 non-inferiority trial designed to assess three functional tests - stress echocardiography,  
142 single photon emission computed tomography (SPECT) and stress cardiac magnetic  
143 resonance imaging (CMR) - as a gatekeeper to coronary angiography (CA) in patients  
144 referred for CA with suspected coronary artery disease (CAD). Early clinical and cost-  
145 effectiveness estimates have been published and showed that the CMR group had slightly  
146 lower mean exercise treadmill time according to the Bruce protocol but otherwise the tests  
147 could be considered equally effective<sup>(10)</sup>. This report provides the main cost-effectiveness  
148 and mortality outcomes up to 6 years after randomisation.

149

## 150 **Methods**

### 151 **Study design**

152 The design of the study has been described elsewhere<sup>(10)</sup> and is reviewed briefly here. All  
153 patients referred to Papworth Hospital, UK for non-urgent angiography were eligible for the  
154 study. Inclusion criteria were: established or suspected chronic stable angina and a positive

1  
2  
3 155 exercise tolerance test result with subsequent referral for angiography. Exclusion criteria  
4  
5 156 were: recent MI (<3 months), revascularisation (<6 months); urgent need for  
6  
7 157 revascularisation; contra-indication to adenosine or CMR; inability to exercise.  
8

9 158

10  
11 159 Trial design was of four parallel arms with a 1:1:1:1 randomisation ratio. Randomisation was  
12  
13 160 computer generated and stratified according to Pryor risk assessment<sup>(11)</sup>. Within each Pryor  
14  
15 161 risk group, randomisation was in blocks of length 6 or 8. Sequentially numbered group  
16  
17 162 designation was held in the Research & Development (R&D) Office and was not available to  
18  
19 163 trial personnel. Patients were randomised to their initial diagnostic test - stress SPECT,  
20  
21 164 stress CMR, stress echocardiography, or angiography - by R&D within 4 weeks of  
22  
23 165 recruitment and only after they had given consent and been registered.  
24

25 166

26  
27 167 Non invasive imaging results were returned with a recommendation to proceed with  
28  
29 168 angiography only when reported as 'positive' for inducible ischemia. Protocol adherence to  
30  
31 169 this recommendation was not mandated by trial design and patients proceeded to  
32  
33 170 angiography if considered clinically indicated. Treatment with PCI or CABG (performed  
34  
35 171 within six months of angiography) or to medical therapy was according to standard practice.  
36

37 172

### 38 39 173 **Coronary angiography.**

40  
41 174 Standard diagnostic angiography was performed from the right femoral artery approach<sup>(12)</sup>.  
42  
43 175 A minimum of 5 views of the left and 3 views of the right coronary system were taken<sup>(13)</sup>. All  
44  
45 176 examinations were reported by an experienced staff cardiologist and segmental location of  
46  
47 177 disease (if any) recorded.  
48

49 178

### 50 51 179 **Stress echocardiography**

52  
53 180 Beta-blocker medications were stopped 2 days beforehand. Dobutamine was infused at  
54  
55 181 rates of 10- 40 mcg/kg/min, increased at 3 minute intervals. If necessary, 300-600  
56  
57 182 micrograms of atropine were added at peak stress to achieve 90% of target heart  
58  
59  
60

1  
2  
3 183 rate. Images were acquired in standard planes in the final minute of each 3 minute stage.  
4  
5 184 Intravenous microspheres were used to delineate the endocardial surface. All examinations  
6  
7 185 were reported by one of two staff cardiologists experienced in stress echocardiography.  
8  
9 186 Studies were positive for ischemia if stress-induced deterioration in contractility was  
10  
11 187 observed.

12 188

13  
14  
15 **SPECT**

16  
17 190 Rest/stress 99mTc sestamibi (99mTc MIBI) SPECT was performed (2 day protocol). A 6  
18  
19 191 minute adenosine infusion (140 µg/kg/min) was employed. 400 MBq 99m-Tc MIBI was  
20  
21 192 administered at 3 minutes after infusion of adenosine was started. Gated SPECT imaging  
22  
23 193 occurred 60 minutes after injection. Tomographic images were assessed for fixed and  
24  
25 194 reversible defects by a single observer (as per established criteria)<sup>(14)</sup>.

26  
27 19528  
29 **CMR**

30  
31 197 Stress CMR imaging was performed at a standard similar to that which was subsequently  
32  
33 198 recommended by the Society of Cardiovascular Magnetic Resonance <sup>(15)</sup>. A 1.5T mobile  
34  
35 199 CMR system and 4-channel phased array surface coil were used (Signa CV/i, GE Medical  
36  
37 200 Systems). Stress/rest dynamic first-pass perfusion imaging was performed. A hybrid fast  
38  
39 201 gradient echo/echoplanar sequence was employed <sup>(16)</sup>. Adenosine was infused at 140  
40  
41 202 mcg/kg/min for 4 minutes. After 3 minutes, a bolus of Gadolinium-DTPA (0.1mmol/kg) was  
42  
43 203 delivered at 5mls/sec, followed by a 25ml saline flush. First-pass imaging of the heart  
44  
45 204 occurred over 80 heart beats. A volumetric notched-saturation pre-pulse preserved a  
46  
47 205 constant saturation-recovery time during slice acquisition <sup>(17)</sup>. 6-8 short axis slices were  
48  
49 206 obtained every 2 heart beats. Rest imaging was repeated after a minimum interval of 15  
50  
51 207 minutes. Cine steady state free precession images and late gadolinium enhancement  
52  
53 208 images were also acquired as described in the original CECaT protocol <sup>(10)</sup> Studies were  
54  
55 209 reported as positive if there was an inducible perfusion defect visible for at least 5 frames  
56  
57  
58  
59  
60



1  
2  
3 210 either: a) in a region of normal wall thickness; or b) in a region of myocardial thinning in the  
4  
5 211 absence of a history of prior myocardial infarction.  
6

7 212

### 8 213 **Outcomes**

9  
10 214 The primary outcome in the original CECaT trial was exercise treadmill time at 18 months  
11  
12 215 post-randomisation using the modified Bruce protocol, in which exercise intensity was  
13  
14 216 increased every 3 minutes. There was a range of secondary outcomes including diagnostic  
15  
16 217 accuracy, clinical events, health-related quality and cost-effectiveness of life up to 18 months  
17  
18 218 after randomisation<sup>(10)</sup>.

19  
20 219 The primary outcomes of this follow up study were survival up to a minimum of 2 years post-  
21  
22 220 treatment, quality-adjusted survival and cost-utility of each strategy. Survival status at the  
23  
24 221 end of follow up was determined from the Office for National Statistics database, UK  
25  
26 222 (<http://www.ons.gov.uk/>).  
27

28  
29 223 Quality of life was measured using the EuroQoL EQ-5D questionnaire<sup>(18)</sup> which was  
30  
31 224 completed at baseline, 6 and 18 months post-randomisation, and at 6, 18 and 24 months  
32  
33 225 post-treatment. The social tariff for the EQ-5D was applied in order to calculate utility values  
34  
35 226<sup>(19)</sup>. Because post-treatment measurements were at variable times post-randomisation  
36  
37 227 (randomisation date is time zero for a randomised trial) daily utilities were estimated using  
38  
39 228 linear interpolation.  
40

41 229

### 42 230 **Sample size calculations**

43  
44 231 The sample size of 898 patients was based on exercise performance and was calculated  
45  
46 232 according to the methodology published in the initial report of the CECaT study<sup>(10)</sup>.  
47

48 233

### 49 234 **Statistical and economic analysis**

50  
51 235 For this study, survival was summarised using Kaplan-Meier estimates and the groups were  
52  
53 236 compared using Cox proportional hazards regression. This assumes that the instantaneous  
54  
55 237 risk of death (hazard) for a reference value of a covariate will vary through time, but that the  
56  
57  
58  
59  
60

1  
2  
3 238 hazards for other values of the covariate will be a constant multiple of this baseline hazard,  
4  
5 239 and this multiple will not vary through time. This assumption was tested using Schoenfeld  
6  
7 240 residuals and there was little evidence against it. The diagnostic test was entered into the  
8  
9 241 Cox regression as a 4-level fixed covariate, with angiography as the reference category. In  
10  
11 242 sensitivity analysis CABG and PCI were included in the regression analyses as time-varying  
12  
13 243 covariates, taking a value 0 up to the time of intervention and 1 thereafter, to ensure that any  
14  
15 244 differences between the groups was not due to differences in treatment. Inclusion of  
16  
17 245 treatment (CABG/PCI) did not affect comparison of diagnostic strategies and results of these  
18  
19 246 analyses are not included here.  
20  
21 247  
22  
23 248 Patient-specific hospital resource use was collected for 2 years post-*treatment* with  
24  
25 249 revascularisation or medical management. Costs were based on National Health Service  
26  
27 250 reference costs 2005/06 prices. An annual discount rate of 3.5% was applied to all costs and  
28  
29 251 quality-adjusted life-years (QALYs) after 12 months post-randomisation. Resources costed  
30  
31 252 were: imaging tests; revascularisation; inpatient/outpatient episodes; adverse events;  
32  
33 253 cardiac-related medications. Patient-reported admissions for MI were verified with the  
34  
35 254 admitting hospital and adjudicated.  
36  
37 255  
38  
39 256 Quality adjusted survival and cost estimates were censored at the last follow up at 2 years  
40  
41 257 after treatment, resulting in varying duration of follow-up from the time of randomisation to  
42  
43 258 the different diagnostic strategies, so that mean values over a range of time horizons were  
44  
45 259 estimated using inverse weighting methods<sup>(20)</sup>. This method allows for differing follow up  
46  
47 260 times between patients by splitting follow up time into intervals, and up-weighting the  
48  
49 261 observed quality adjusted survival and costs in an interval in proportion to the inverse of the  
50  
51 262 Kaplan-Meier estimate of the proportion observed during the interval. In the base case we  
52  
53 263 used a time horizon of 3 years since it was the longest period over which results were stable,  
54  
55 264 with acceptable precision. Confidence intervals for costs and QALYs were estimated using  
56  
57 265 bootstrapping with 5000 samples<sup>(21)</sup>.  
58  
59  
60

1  
2  
3 266 **Sensitivity analysis**

4  
5 267 Sensitivity of cost-utility results for different time horizons was assessed by re-estimating  
6  
7 268 results up to 12, 18, 24, 36 and 48 months after randomization. In addition, cardiologists  
8  
9 269 were divided into those who did and did not perform percutaneous coronary intervention as  
10  
11 270 part of their routine clinical practice, and results were recalculated for each subgroup. With  
12  
13 271 the exception of this *post-hoc* data interrogation, all other results presented derive from  
14  
15 272 intention-to-treat analysis.  
16

17 273

18  
19 274 The study had IRB approval and full written informed consent was obtained from all  
20  
21 275 participants. All authors had full access to the data and take responsibility for the manuscript  
22  
23 276 as written.  
24

25 277

26  
27 278 **Results**

28  
29 279 **Recruitment and compliance**

30  
31 280 Between September 2001 and September 2004, 3,201 patients were assessed, 1,981 were  
32  
33 281 excluded and 322 refused entry to the trial. Refusals were more likely to come from women  
34  
35 282 (46% compared with 31% enrolled into the study,  $p<0.001$ ) and were significantly older  
36  
37 283 (mean age 64.6, (SD 10.1) compared with study group mean age 61.8, (9.4),  $p<0.001$ ).  
38

39 284

40  
41 285 898 patients were randomised. Groups were well matched at baseline (table 1). In each  
42  
43 286 group 69% of patients were high risk for CAD (Pryor score  $> 0.8$ ). The trial was closed to  
44  
45 287 recruitment in September 2004 after enrolling the pre-specified number of subjects.  
46

47 288

48  
49 289 One-hundred-seventy-five (78%) SPECT patients, 180 (80%) CMR patients and 169 (75%)  
50  
51 290 stress echo patients were referred on for angiography (**Figure 1**). Between 20% and 25% of  
52  
53 291 patients undergoing non-invasive tests did not require further investigation. Twenty-one  
54  
55 292 percent of patients who had negative tests were referred for angiography and the proportion  
56  
57 293 was similar in each group (SPECT  $n=45$ , CMR  $n=50$ , ECHO  $n=48$ ,  $p=0.858$ ). Of these 14  
58  
59  
60

1  
2  
3 294 (31%) SPECT, 26 (52%) CMR and 23 (48%) ECHO resulted in a positive angiogram  
4  
5 295 (p=0.130). Four patients died and four withdrew from the trial early on. Of the remaining  
6  
7 296 patients, revascularization was required in 34% (301/890 – see **Figure 1** for numbers in  
8  
9 297 each arm). There was no significant difference between the groups in initial patient  
10  
11 298 management (Figure 1, p=0.527). Beyond the initial management strategy 42 subsequent  
12  
13 299 revascularisation procedures were required in the angiography arm compared with 30 in the  
14  
15 300 SPECT, 44 in the CMR and 41 in the ECHO arms. The median times between  
16  
17 301 randomisation and initial revascularisation were 122 days in the angiography group, 192  
18  
19 302 days for SPECT, 184 days for CMR and 177.5 days for ECHO, resulting in a delay due to  
20  
21 303 functional testing of approximately 2 months.  
22  
23 304

### 305 **Survival**

26  
27 306 During the study there were 7 (3%), 7 (3%), 18 (8%) and 11 (5%) deaths in the angiography  
28  
29 307 , SPECT, CMR and ECHO groups respectively. Kaplan-Meier survival curves for the 4  
30  
31 308 groups are plotted in **Figure 2**. Survival over the whole trial period in the SPECT (hazard  
32  
33 309 ratio 1.0, 95%CI 0.4, 2.9) and stress echo (hazard ratio 1.6, 95%CI 0.6, 4.0) groups were not  
34  
35 310 significantly different from angiography but the CMR group had higher mortality, with hazard  
36  
37 311 ratio 2.6 (95%CI 1.1 to 6.2), p=0.032. The significant effect of CMR on survival remained  
38  
39 312 when CABG or PCI were included in the models. However, mortality was low in all groups  
40  
41 313 and the absolute mean difference in survival was less than 1 month over 3 years (**Table 2**).  
42  
43 314 Mean survival estimates over 3 years with 95% confidence intervals are shown in **Table 2**.  
44  
45 315 All patients had complete adverse event data up to 18 months post-randomisation during  
46  
47 316 which there were 178 non-fatal adverse events in 114 patients, mostly hospital admissions  
48  
49 317 for chest pain (**Table 3**). Beyond this time only adverse events that resulted in admissions  
50  
51 318 were recorded as they were relevant for the economic analysis. No patient suffered any  
52  
53 319 adverse event at the time of the initial randomised imaging test.  
54  
55 320

### 58 321 **Cost-utility**

1  
2  
3 322 **Table 4** shows some of the highest incurred follow up costs for the 4 groups and shows that  
4  
5 323 patient management varied substantially between individuals. Although angiography was the  
6  
7 324 most expensive of the four initial diagnostic tests, the strategy of initial angiography had  
8  
9 325 lower mean overall cost than stress echo, and was similar to CMR up to 3 years (**Table 2**).  
10  
11 326 Extra costs for patients in the three non-invasive groups was largely due to patients  
12  
13 327 undergoing follow-on angiography. There were no significant differences in overall costs  
14  
15 328 between the groups.

16  
17 329  
18  
19 330 During the study there were no significant differences in EQ-5D between the groups. **Figure**  
20  
21 331 **3** shows daily mean EQ-5D utility over time based on interpolation between measurements  
22  
23 332 for survivors who completed the EQ-5D. Using inverse-weighting we calculated QALYs over  
24  
25 333 different time horizons and these are presented up to 3 years in **Table 2**. Mean QALYs over  
26  
27 334 3 years in the angiography group was 2.24, which was not significantly different from the  
28  
29 335 other groups. **Figure 4** shows the joint distribution of the difference in mean cost against the  
30  
31 336 difference in mean QALY for each diagnostic strategy group and angiography alone, and  
32  
33 337 shows the uncertainty in these estimates. **Figure 5** shows the Cost-Effectiveness  
34  
35 338 Acceptability Curve and demonstrated that SPECT has a high chance (>70%) of being cost-  
36  
37 339 effective whatever the willingness-to-pay threshold is but for CMR and ECHO there is much  
38  
39 340 less certainty about this decision. The mean differences between groups were close to zero  
40  
41 341 in all 3 cases so that the cost-per-QALY estimates are unstable and a cost-minimization  
42  
43 342 approach may be more appropriate. This would favour SPECT, which was both cheaper and  
44  
45 343 more effective on average than angiography, and had the lowest overall cost ( ).

46  
47 344

#### 48 49 345 **Sensitivity analysis**

50  
51 346 The comparisons between the diagnostic strategy groups did not change substantially when  
52  
53 347 we varied the time horizon; the main effect of this was that the variation surrounding  
54  
55 348 estimates increased as the time horizon lengthened due to the heavy censoring (results not  
56  
57 349 shown). **Tables 2a and 2b** show results for interventional and non-invasive cardiologists  
58  
59  
60

1  
2  
3 350 respectively. Patients who were managed by interventional cardiologists incurred higher  
4  
5 351 costs due to the greater number of tests and revascularization procedures performed, with  
6  
7 352 minimal incremental benefit in QALY.  
8

9 353

## 10 354 **Discussion**

11  
12  
13 355 CECaT is the first completed prospective randomized trial to look at the clinical and cost-  
14  
15 356 effectiveness of non-invasive imaging in the diagnosis and management of angina. To the  
16  
17 357 best of the authors' knowledge there has been no comparable outcomes trial published on  
18  
19 358 this scale evaluating three independent non-invasive 'gatekeeper' modalities versus initial  
20  
21 359 angiography in stable chest pain. The trial is also unusual in the length of prospective follow  
22  
23 360 up extending to 6 years for mortality outcomes.  
24

25 361

26  
27 362 We have demonstrated that use of any one of stress CMR, stress echo or stress SPECT as  
28  
29 363 the initial test for a stable chest pain patient leads to non-inferior outcomes in quality of life  
30  
31 364 and cost utility compared to patients randomised to upfront invasive coronary angiography.  
32  
33 365 Typically, non invasive tests perform well in low risk populations because of a negative  
34  
35 366 predictive value which is usually better than the positive predictive value. However, the  
36  
37 367 patient risk profile was relatively high in our study, and despite this there was no significant  
38  
39 368 difference between an initial functional or anatomic approach.  
40

41 369

42  
43  
44 370 There are several reasons why initial angiography may not have led to clear benefit in our  
45  
46 371 study. Firstly, although angiography has stood at the heart of the diagnostic chest pain  
47  
48 372 pathway, the traditional binary cut-off values of 50% or 70% percentage stenosis by visual  
49  
50 373 estimation were shown in the FAME study to bear little relation to the true physiologic  
51  
52 374 significance of luminal narrowing <sup>(22)</sup>.  
53

54 375

55  
56 376 Secondly, data from various countries suggest that not only is coronary angiography often  
57  
58 377 inappropriate when formally rated by expert observers <sup>(23)</sup> <sup>(24)</sup> but that disparate national or  
59  
60

1  
2  
3 378 regional rates of angiography do not translate into clear mortality benefits between countries  
4  
5 379 <sup>(25) (26) (27) (28)</sup> and on occasion may even demonstrate an inverse relationship <sup>(29)</sup>.

6  
7 380 Contemporary US data from approximately 500,000 PCI procedures collected prospectively  
8  
9 381 in the National Cardiovascular Data Registry demonstrated that, of 145,000 elective PCI  
10  
11 382 cases, roughly 12% were judged inappropriate. Furthermore, the rate of inappropriate  
12  
13 383 elective PCI between hospital sites ranged from 0-55% suggesting significant variability in  
14  
15 384 practice <sup>(30)</sup>. The data suggest a better way of selecting patients for invasive investigation is  
16  
17 385 needed.  
18  
19 386

20  
21 387 Ischemia-driven revascularisation has been shown to be of benefit in a number of trials,  
22  
23 388 most recently in the FAME study in which an invasive method of measuring the flow reserve  
24  
25 389 of the microcirculation (Fractional Flow Reserve, FFR) was used to allocate patients to  
26  
27 390 intervention or observation vs a clinical decision on intervention based on angiography alone  
28  
29 391 <sup>(31)</sup>. At 2 years follow up there were clear survival and MACE benefits to the FFR-based  
30  
31 392 approach.  
32  
33

34 393  
35 394 The ACRE study reported that, up to 6 years after diagnosis, medical management was a  
36  
37 395 more cost-effective strategy for angina compared with PCI <sup>(32)</sup>. The lack of evidence for  
38  
39 396 survival from revascularisation was also seen in the COURAGE trial <sup>(4)</sup>. Critics have  
40  
41 397 suggested this may be because randomization to PCI versus optimal medical therapy was  
42  
43 398 made *after* coronary angiography had been performed, potentially leading to a recruitment  
44  
45 399 bias of patients with less severe disease. In the CECaT trial this bias was avoided by  
46  
47 400 randomization to a management strategy defined by the non-invasive test result for each of  
48  
49 401 the 3 functional arms of the trial. In a relatively high risk population, we demonstrated no  
50  
51 402 clinically significant survival or economic detriment from using non-invasive imaging as a  
52  
53 403 gate-keeper to catheterization. Similarly, quality of life was not significantly different across  
54  
55 404 all four groups and these differences extended to a warranty period of at least 3 years.  
56  
57  
58 405



1  
2  
3 406 We did observe a marginal decrease in survival in the CMR arm. The reasons for the  
4  
5 407 difference are unclear but do not relate to patient characteristics or management with CABG  
6  
7 408 or PCI. Although statistically significant, the mean survival difference from the other groups  
8  
9 409 was only 4 weeks over 3 years and is unlikely to be clinically meaningful. Since recent work  
10  
11 410 has established a strong correspondence between FFR measurements and stress CMR  
12  
13 411 perfusion indices it would be surprising if CMR were genuinely inferior to other modalities for  
14  
15 412 risk stratification<sup>(33)</sup>. Indeed several recent publications have highlighted the incremental  
16  
17 413 prognostic data (above that obtained from clinical variables) derived from several thousand  
18  
19 414 perfusion CMR studies<sup>(34)(35)</sup>.

20  
21 415

22  
23 416 Given the recent publication of the CEMARC trial<sup>(36)</sup> in which a clear diagnostic superiority  
24  
25 417 was demonstrated for stress CMR over SPECT, it is interesting that our data nonetheless  
26  
27 418 show an equivalence in functional health status between those randomized to SPECT  
28  
29 419 versus CMR in the CECaT trial. The implication may be that although CMR detects the  
30  
31 420 presence of *any* ischemia with a greater sensitivity it is the *overall burden* of ischemia that  
32  
33 421 alters a patient's prognosis. As such, it has not yet been demonstrated that the higher  
34  
35 422 diagnostic accuracy of CMR translates into better long-term patient outcomes – a fact  
36  
37 423 acknowledged by Greenwood et al subsequent to CEMARC's publication<sup>(37)</sup>. In this context  
38  
39 424 the CECaT nuclear results are congruent with numerous past publications and reconfirm the  
40  
41 425 reassuring warranty period of a normal SPECT study.

42  
43 426

#### 44 45 427 **Cost effectiveness**

46  
47 428 There was no significant difference in cost-effectiveness between the angiography -as-  
48  
49 429 default group and the non-invasive test groups up to 3 years, perhaps relating to the higher-  
50  
51 430 than-anticipated rate of referral for angiography after negative functional tests. Protocol  
52  
53 431 deviation of this kind is not infrequent in trials of non-invasive technology. In the recent  
54  
55 432 PARR-2 study of patients undergoing fluorodeoxyglucose positron emission tomography for  
56  
57 433 the assessment of viability, roughly 25 % of the study population did not adhere to protocol  
58  
59  
60



1  
2  
3 434 <sup>(38)</sup>. The willingness of a cardiologist to defer referral for coronary angiography in the face of  
4  
5 435 a normal non-invasive study may in part reflect individual prejudices and job description  
6  
7 436 (interventional versus non-invasive) as demonstrated in a recent survey of cardiology  
8  
9 437 attitudes <sup>(39)</sup> and was also reflected in our own data.  
10

11 438

12  
13 439 In CECaT, 20-25% of patients receiving a non-invasive test did not go on to have  
14  
15 440 angiography. A proportion of the additional cost in the non-invasive arms related to  
16  
17 441 angiography and PCI in the patients with a *negative* test, although only very few  
18  
19 442 subsequently required CABG - a robust marker of significant disease - during follow-up. This  
20  
21 443 readiness to employ PCI in a group in whom the indication/benefit is debatable was also  
22  
23 444 seen in the ACRE trial <sup>(32)</sup> and reflects understandable clinical response to uncertainty but  
24  
25 445 also the easy access to PCI in healthcare systems without barriers to self-referral <sup>(40)</sup>.  
26

27 446 Similarly, studies from the US have demonstrated a greater willingness to use coronary  
28  
29 447 angiography when available 'on site' as is increasingly seen even in small-to-medium sized  
30  
31 448 hospitals <sup>(41) (42) (43)</sup>.  
32

33 449

#### 35 450 **Cost effectiveness of each non-invasive technique**

37 451

38  
39 452 Nuclear myocardial perfusion imaging  
40

41 453

42  
43 454 The END study used propensity matching to compare a large cohort of patients referred for  
44  
45 455 either gate-keeper myocardial perfusion imaging or upfront angiography – this non  
46  
47 456 randomised study demonstrated a significant cost reduction in the (44) nuclear arm. In  
48  
49 457 contrast to this and other work <sup>(45) (46) (47)</sup> we were unable to show a significant difference in  
50  
51 458 cost effectiveness in our own study. To some extent this reflected the participating physician  
52  
53 459 bias towards angiography during the period of trial recruitment (2001-2006) with many  
54  
55 460 patients referred for angiography despite normal perfusion studies. This continues in the  
56  
57 461 contemporary era with Chan et al demonstrating that almost 80% of Delphi-adjudicated  
58  
59  
60

1  
2  
3 462 inappropriate elective PCIs were performed following either low risk ischemia imaging in  
4  
5 463 mildly symptomatic patients or intermediate risk imaging in entirely asymptomatic patients  
6  
7 464 <sup>(30)</sup>.

8  
9 465  
10  
11 466 In the CECaT study, when PCI was performed despite a negative initial non-invasive test,  
12  
13 467 this occurred because subsequent angiography indicated 'significant' stenosis. This was a  
14  
15 468 clinical judgment based on 'eyeball assessment' of lesion severity as has been reported in  
16  
17 469 clinical trials with angiographic end points <sup>(48)</sup>. However, the severity and functional  
18  
19 470 significance of many stenoses may be over-called, even by quantitative assessment, when  
20  
21 471 compared with physiological assessment of fractional flow reserve across the lesion <sup>(49) (50)</sup>.

22  
23 472 Further improvement in cost-effectiveness could likely have been achieved in the nuclear  
24  
25 473 arm of the trial. Our post-trial practice is to perform the stress SPECT first - and if this is  
26  
27 474 negative - cancel the rest test, likely augmenting the relative cost-effectiveness of SPECT  
28  
29 475 <sup>(51)</sup>.

30  
31 476

32  
33 477 CMR

34  
35 478 There are relatively few data available regarding the cost effectiveness of CMR . One recent  
36  
37 479 mathematical modelling study estimated that CMR likely has greater cost effectiveness/utility  
38  
39 480 compared to SPECT despite greater base case cost of the former <sup>(52)</sup> . The economic  
40  
41 481 superiority of CMR was also recently described by the CEMARC group, although  
42  
43 482 interestingly the base case costs employed for CMR and SPECT in their analysis differed by  
44  
45 483 only a few pounds. Their own sensitivity analysis in fact demonstrated that if the costs of the  
46  
47 484 two tests varied by more than 100 pounds (which was the case in our study) then in fact – as  
48  
49 485 we found - SPECT became the dominant strategy in a low-to-intermediate risk population.

50  
51 486 <sup>(53)</sup>

52  
53 487

54  
55 488 Stress echo

1  
2  
3 489 Stress echocardiography may be a more cost-effective strategy than angiography for men  
4  
5 490 aged 50-60 with CAD prevalence of 50%<sup>(54), (47)</sup>. There is also some evidence that stress  
6  
7 491 echo is more cost-effective than SPECT as an initial test <sup>(55) (56)</sup>, especially in women with  
8  
9 492 suspected CAD <sup>(57)</sup>. A similar benefit was not seen in our study probably because of the high  
10  
11 493 disease prevalence in our population. The lack of superiority of either stress  
12  
13 494 echocardiography or a combined strategy of exercise testing and stress echo compared to  
14  
15 495 upfront catheterisation was also evident in a recent Polish study of 600 patients with a  
16  
17 496 similar age, gender and disease prevalence to our own study population <sup>(58)</sup>.  
18  
19 497

20  
21 498 Taken overall, our data clearly demonstrate a limited future role for cost-effective non-  
22  
23 499 invasive imaging if referring physicians are not willing to accept a negative result as ground  
24  
25 500 truth. This might be interpreted as reflecting a need for greater physician education since we  
26  
27 501 showed a clear difference in onward referral rates for angiography after a negative test  
28  
29 502 between interventional and non-invasive cardiologists.  
30  
31 503

### 32 33 504 ***Clinical effectiveness***

34  
35 505 We demonstrated that SPECT can obviate the need for coronary angiography for a  
36  
37 506 significant number of patients without any clinical detriment. In the stress echo group clinical  
38  
39 507 outcomes were also comparable to the angiography subgroup at 18 months. The CMR  
40  
41 508 group had statistically marginally poorer survival and this follows our earlier finding that CMR  
42  
43 509 patients had significantly worse exercise tolerance at 18 months after randomisation <sup>(10)</sup>. This  
44  
45 510 is difficult to explain on the basis of Pryor risk score or other baseline clinical variables.  
46  
47 511 However, the mean difference in survival between the CMR arm and the other groups was  
48  
49 512 only 4 weeks and thus of marginal clinical significance. More importantly, the CMR group  
50  
51 513 were not otherwise disadvantaged – compared to the angiographic control group - with  
52  
53 514 respect to major adverse events, other resource use, or quality of life.  
54  
55 515

### 56 57 58 516 ***Limitations***

1  
2  
3 517 This study was carried out in a single specialist cardiothoracic centre with a significant  
4  
5 518 proportion of high risk, predominantly white European, male patients. Those eligible who  
6  
7 519 refused the trial were older and were more likely to be women.  
8

9 520

10  
11 521 Survival data from the national registry did not include cause of death so that deaths due to  
12  
13 522 cardiovascular causes could not be reported separately.  
14

15 523

16  
17 524 The trial completed recruitment in 2004 and we used the technology that was available to us  
18  
19 525 at the onset of the trial. At that time, we were not able to use attenuation correction for  
20  
21 526 SPECT imaging; however this was also not used in the much more recent CEMARC trial<sup>(36)</sup>.  
22  
23 527 Similarly, we performed our CMR exams in a mobile facility on a 1.5T scanner with only  
24  
25 528 modest coil technology and limited temporal and anatomic coverage that would compare  
26  
27 529 unfavourably with the 3T whole heart high resolution perfusion studies available today.  
28

29 530

30  
31 531 The trial aimed to reflect the strategy of using non-invasive imaging as a gateway to  
32  
33 532 angiography in *contemporary clinical practice*. The test results were considered in  
34  
35 533 conjunction with other information available at the time. Thus it was not the aim to formally  
36  
37 534 assess diagnostic accuracy of the non-invasive tests in this context. This trial-based study  
38  
39 535 was limited to 3 year cost-effectiveness follow up - longer-term economic models would  
40  
41 536 provide lifetime estimates of the cost-effectiveness of the non-invasive strategies and could  
42  
43 537 include advances in imaging technology.  
44

45 538

#### 46 539 **Conclusions**

47  
48  
49 540 We have demonstrated in the CECaT trial that stress echo, stress CMR and stress SPECT  
50  
51 541 may each be used to defer invasive coronary angiography without clinical detriment or  
52  
53 542 significant excess costs in an outpatient population with stable chest pain.  
54

55 543

#### 56 544 **Acknowledgements**

57  
58  
59  
60

1  
2  
3 545

4  
5 546 The original CECaT study was funded by a grant from the UK National Health Service R&D  
6  
7 547 Health Technology Assessment Program (project no. 99/26/04). HT, CJ and LDS were  
8  
9 548 supported by the Medical Research Council [Programme number U015232027].  
10

11 549

12  
13 550 **Competing interests**

14  
15 551

16  
17 552 All authors have completed the ICMJE uniform disclosure form at  
18  
19 553 [http://www.icmje.org/coi\\_disclosure.pdf](http://www.icmje.org/coi_disclosure.pdf) and declare: support from the UK National Health  
20  
21 554 Service R&D Health Technology Assessment Program (project no. 99/26/04) and the UK  
22  
23 555 Medical Research Council [Programme number U015232027] for the submitted work ; no  
24  
25 556 financial relationships with any organisations that might have an interest in the submitted  
26  
27 557 work in the previous three years; no other relationships or activities that could appear to  
28  
29 558 have influenced the submitted work

30  
31 559 **Exclusive licence statement**

32  
33 560

34  
35 561 The Corresponding Author has the right to grant on behalf of all authors and does grant on  
36  
37 562 behalf of all authors, an exclusive licence (or non exclusive for government employees) on a  
38  
39 563 worldwide basis to the BMJ Publishing Group Ltd and its Licensees to permit this article (if  
40  
41 564 accepted) to be published in BMJ editions and any other BMJ PGL products and sublicences  
42  
43 565 to exploit all subsidiary rights, as set out in our licence  
44  
45 566 (<http://resources.bmj.com/bmj/authors/checklists-forms/licence-for-publication>).  
46  
47

48 567

49 568 **Contributorship statement**

50  
51 569

52  
53  
54 570 HT performed literature review, data analysis and interpretation; NW was involved in image  
55  
56 571 analysis, drafting the manuscript and critical revision; VH was involved in recruiting the  
57  
58 572 patients, data management, administering health questionnaires, data analysis and drafting  
59  
60

1  
2  
3 573 the manuscript; MD and MB were responsible for data analysis, health economic  
4  
5 574 assessment, drafting the manuscript and critical revision; LDS was responsible for study  
6  
7 575 design, trial management, statistical analysis, drafting the manuscript and critical revision;  
8  
9 576 CJ performed statistical and health economic analysis, drafting the manuscript and critical  
10  
11 577 revision; AMC was involved in study design, patient recruitment, image interpretation, trial  
12  
13 578 management, drafting the manuscript and critical revision and is the overall guarantor of  
14  
15 579 manuscript integrity.  
16  
17 580  
18  
19 581 All authors have read the manuscript in its submitted form and have provided final approval  
20  
21 582 for publication.  
22  
23  
24  
25  
26  
27  
28  
29  
30  
31  
32  
33  
34  
35  
36  
37  
38  
39  
40  
41  
42  
43  
44  
45  
46  
47  
48  
49  
50  
51  
52  
53  
54  
55  
56  
57  
58  
59  
60

583 **Table 1 Baseline characteristics\***

|                                                             | Angiography<br>(n=222) | SPECT<br>(n=224) | Cardiac MRI<br>(n=226) | Stress Echo<br>(n=226) |
|-------------------------------------------------------------|------------------------|------------------|------------------------|------------------------|
| <b>Demographics</b>                                         |                        |                  |                        |                        |
| Mean (SD) age (years)                                       | 60.7 (9.1)             | 62.1 (9.5)       | 62.2 (9.0)             | 61.9 (9.9)             |
| Males (%)                                                   | 149 (67%)              | 157 (70%)        | 153 (68%)              | 160 (71%)              |
| <b>History/risk factors</b>                                 |                        |                  |                        |                        |
| Previous MI (%)                                             | 63 (28%)               | 52 (23%)         | 69 (31%)               | 59 (26%)               |
| Previous CVA (%)                                            | 10 (5%)                | 13 (6%)          | 8 (4%)                 | 12 (5%)                |
| <b>Diabetes(%)</b>                                          |                        |                  |                        |                        |
| IDDM                                                        | 12 (5%)                | 8 (4%)           | 11 (5%)                | 5 (2%)                 |
| NIDDM                                                       | 16 (7%)                | 18 (8%)          | 21 (9%)                | 22 (10%)               |
| Family history CAD                                          | 60 (27%)               | 55 (25%)         | 63 (28%)               | 59 (26%)               |
| <b>Smoking history (%)</b>                                  |                        |                  |                        |                        |
| <25 pack years                                              | 149 (67%)              | 162 (72%)        | 148 (65%)              | 155 (69%)              |
| ≥25 pack years                                              | 73 (33%)               | 62 (28%)         | 78 (35%)               | 71 (31%)               |
| Treated hyperlipidaemia                                     | 164 (74%)              | 171 (76%)        | 179 (79%)              | 179 (79%)              |
| (%)                                                         |                        |                  |                        |                        |
| Treated hypertension (%)                                    | 117 (53%)              | 132 (59%)        | 115 (51%)              | 129 (57%)              |
| <b>Exercise tolerance using the modified Bruce protocol</b> |                        |                  |                        |                        |
| Mean (SD) total exercise<br>time (mins)                     | 11.29 (4.56)           | 10.46 (4.41)     | 10.43 (4.43)           | 10.89 (4.36)           |
| <b>ECG changes on exercise test</b>                         |                        |                  |                        |                        |
| 1-2 mm ST depression<br>with symptoms                       | 53 (24%)               | 43 (19%)         | 54 (24%)               | 57 (25%)               |
| ≥ 2mm ST depression<br>without symptoms                     | 16 (7%)                | 24 (11%)         | 20 (9%)                | 24 (11%)               |

|                           |           |           |           |           |
|---------------------------|-----------|-----------|-----------|-----------|
| ST elevation**/ no change | 153 (69%) | 157 (70%) | 152 (67%) | 145 (64%) |
| CCS class                 |           |           |           |           |
| 0-I                       | 60 (27%)  | 54 (24%)  | 78 (35%)  | 58 (26%)  |
| II                        | 138 (62%) | 144 (64%) | 122 (54%) | 132 (58%) |
| III-IV                    | 24 (11%)  | 26 (12%)  | 26 (11%)  | 36 (16%)  |

584 \* There were no significant differences between the groups in any variable

585 \*\* ST elevation was observed in 3 angiography, 2 CMR and 1 ECHO patients.



586 **Table 2 Cost-effectiveness summaries to 3 years post randomization**

587

|                            | Angiography<br>(n=222) | SPECT (n=224)       | Cardiac MRI<br>(n=226) | Stress Echo<br>(n=226) |
|----------------------------|------------------------|---------------------|------------------------|------------------------|
| Hazard ratio for death     | Baseline               | 0.99                | 2.60                   | 1.42                   |
| (95%CI)                    |                        | (0.35,2.85)         | (1.09,6.22)            | (0.54,3.74)            |
| Mean survival (years)      | 2.96                   | 2.95                | 2.90                   | 2.94                   |
| (95%CI)                    | (2.92, 2.99)           | (2.90, 2.99)        | (2.83, 2.95)           | (2.89, 2.97)           |
| Mean difference vs. CA     | -                      | -0.01               | -0.06                  | -0.02                  |
| (95%CI)                    | -                      | (-0.07,0.05)        | (-0.14, 0.01)          | (-0.08, 0.04)          |
| Mean QALYs                 | 2.24                   | 2.27                | 2.18                   | 2.27                   |
| (95%CI)                    | (2.16,2.31)            | (2.20,2.33)         | (2.11,2.25)            | (2.19,2.33)            |
| Mean difference vs. CA     | -                      | 0.03                | -0.05                  | 0.03                   |
| (95%CI)                    | -                      | <b>(-5.21,1.38)</b> | <b>(-5.21,1.38)</b>    | <b>(-3.04,4.21)</b>    |
| Mean discounted costs      | <b>5243</b>            | <b>4644</b>         | <b>4947</b>            | <b>5530</b>            |
| (£)                        |                        |                     |                        |                        |
| (95%CI)                    | <b>(4282,6461)</b>     | <b>(4194,5126)</b>  | <b>(4480,5431)</b>     | <b>(4857, 6262)</b>    |
| Mean difference vs. CA     | <b>-</b>               | <b>-599</b>         | <b>-296</b>            | <b>287</b>             |
| (95%CI)                    |                        | <b>(-1901,503)</b>  | <b>(-1603, 824)</b>    | <b>(-1109, 1537)</b>   |
| Probability cost effective | <b>-</b>               | <b>0.82</b>         | <b>0.29</b>            | <b>0.55</b>            |
| at £20k per QALY           |                        |                     |                        |                        |
| Probability cost effective | <b>-</b>               | <b>0.79</b>         | <b>0.25</b>            | <b>0.59</b>            |
| at £30k per QALY           |                        |                     |                        |                        |

588

589 **Table 2a Cost-effectiveness summaries for patients managed by interventional**  
 590 **cardiologists to 3 years post randomization**  
 591

|                                                | Angiography<br>(n=73) | SPECT<br>(n=96)     | Cardiac MRI<br>(n=93) | Stress Echo<br>(n=98) |
|------------------------------------------------|-----------------------|---------------------|-----------------------|-----------------------|
| Mean survival (years)                          | 2.96                  | 2.97                | 2.89                  | 2.96                  |
| (95%CI)                                        | (2.91, 2.98)          | (2.93, 3.00)        | (2.80, 2.97)          | (2.90, 2.98)          |
| Mean difference vs. CA                         | -                     | 0.01                | -0.07                 | 0                     |
| (95%CI)                                        | -                     | (-0.05,0.07)        | (-0.17, 0.02)         | (-0.07,0.05)          |
| Mean QALYs                                     | 2.25                  | 2.29                | 2.21                  | 2.2                   |
| (95%CI)                                        | (2.14,2.36)           | (2.19,2.38)         | (2.10,2.32)           | (2.10,2.29)           |
| Mean difference vs. CA                         | -                     | 0.03                | -0.04                 | -0.06                 |
| (95%CI)                                        | -                     | <b>(-5.31,2.30)</b> | <b>(-4.96,2.41)</b>   | <b>(-3.06,6.42)</b>   |
| Mean discounted costs (£)                      | <b>5754</b>           | <b>5205</b>         | <b>5307</b>           | <b>6329</b>           |
| (95%CI)                                        | <b>(4651, 6941)</b>   | <b>(4475, 5979)</b> | <b>(4610, 6032)</b>   | <b>(5120, 7713)</b>   |
| Mean difference vs. CA                         | <b>-</b>              | <b>-549</b>         | <b>-447</b>           | <b>574</b>            |
| (95%CI)                                        |                       | <b>(-1973, 799)</b> | <b>(-1841, 897)</b>   | <b>(-1097, 2262)</b>  |
| Probability cost effective<br>at £20k per QALY |                       | <b>0.72</b>         | <b>0.42</b>           | <b>0.20</b>           |
| Probability cost effective<br>at £30k per QALY |                       | <b>0.70</b>         | <b>0.39</b>           | <b>0.21</b>           |

592 **Table 2b Cost-effectiveness summaries for patients managed by non-interventional**  
 593 **cardiologists to 3 years post randomization**

594

|                                                | Angiography<br>(n=149) | SPECT<br>(n=128)    | Cardiac MRI<br>(n=133) | Stress Echo<br>(n=128) |
|------------------------------------------------|------------------------|---------------------|------------------------|------------------------|
| Mean survival (years)                          | 2.95                   | 2.93                | 2.9                    | 2.92                   |
| (95%CI)                                        | (2.89, 2.99)           | (2.85, 2.98)        | (2.81, 2.97)           | (2.85, 2.98)           |
| Mean difference vs. CA                         | -                      | -0.02               | -0.05                  | -0.03                  |
| (95%CI)                                        | -                      | (-0.11,0.06)        | (-0.15, 0.04)          | (-0.11, 0.05)          |
| Mean QALYs                                     | 2.23                   | 2.25                | 2.17                   | 2.31                   |
| (95%CI)                                        | (2.14,2.31)            | (2.16,2.33)         | (2.07,2.26)            | (2.22,2.40)            |
| Mean difference vs. CA                         | -                      | 0.02                | -0.06                  | 0.09                   |
| (95%CI)                                        | -                      | <b>(-6.92,1.90)</b> | <b>(-5.50,3.45)</b>    | <b>(-5.45,3.71)</b>    |
| Mean discounted costs (£)                      | <b>4936</b>            | <b>4216</b>         | <b>4723</b>            | <b>4780</b>            |
| (95%CI)                                        | <b>(3681, 6665)</b>    | <b>(3635, 4799)</b> | <b>(4068, 5381)</b>    | <b>(4136, 5467)</b>    |
| Mean difference vs. CA                         | <b>-</b>               | <b>-719</b>         | <b>-212</b>            | <b>-156</b>            |
| (95%CI)                                        |                        | <b>(-2527, 695)</b> | <b>(-2007, 1258)</b>   | <b>(-1990, 1353)</b>   |
| Probability cost effective<br>at £20k per QALY |                        | <b>0.75</b>         | <b>0.29</b>            | <b>0.85</b>            |
| Probability cost effective<br>at £30k per QALY |                        | <b>0.72</b>         | <b>0.27</b>            | <b>0.86</b>            |

595

596

597 **Table 3 Summary adverse events during initial 18 months follow up\***

|                        | Angiography | SPECT   | Cardiac MRI | Stress Echo |
|------------------------|-------------|---------|-------------|-------------|
| Adverse event          | (n=222)     | (n=224) | (n=226)     | (n=226)     |
| Total adverse events   | 38          | 34      | 44          | 62          |
| Chest pain (not        | 21          | 20      | 28          | 35          |
| myocardial infarction) |             |         |             |             |
| Angina                 | 7           | 5       | 4           | 3           |
| Myocardial infarction  | 2           | 0       | 3           | 6           |

598 \* Note that beyond this time only events that required hospital admission were recorded.

599

600

601 **Table 4** Summary of the frequency of use of the main resource use elements during follow up  
 602 of up to 3 years (excluding initial diagnostic test)

603

| Resource use (unit cost)                   | Angiography<br>(n=222) | SPECT<br>(n=224) | Cardiac MRI<br>(n=226) | Stress Echo<br>(n=226) |
|--------------------------------------------|------------------------|------------------|------------------------|------------------------|
| CABG (£7195)                               | 28                     | 33               | 28                     | 34                     |
| PCI (£3660)                                | 57                     | 46               | 60                     | 62                     |
| Other hospital admission<br>(£467 per day) | 36                     | 29               | 28                     | 53                     |
| Angiography (£625)                         | 12                     | 183              | 175                    | 181                    |
| SPECT (£405)                               | 16                     | 3                | 3                      | 6                      |
| Cardiac MRI (£565)                         | 5                      | 5                | 12                     | 5                      |
| Echocardiography (£435)                    | 30                     | 17               | 24                     | 18                     |
| PET scan (£842)                            | 0                      | 3                | 0                      | 1                      |
| Preadmission clinic (£85)                  | 22                     | 21               | 27                     | 24                     |
| Follow up clinic (£85)                     | 19                     | 22               | 31                     | 21                     |
| Outpatient visits (£143)                   | 247                    | 270              | 300                    | 284                    |

604

605 \* Cardiac drugs were also included but are not shown here due to many different  
 606 combinations of drugs and doses prescribed.

607

608

1  
2  
3 609 **Figure Legends**

4  
5 610

6  
7 611 **Figure 1 CONSORT diagram describing recruitment and randomization**

8  
9 612

10  
11 613 **Figure 2 Kaplan-Meier survival estimates according to initial modality of diagnosis**

12  
13 614

14  
15 615 **Figure 3 Quality of life assessed by EQ5D over time**

16  
17 616

18  
19 617 **Figure 4 Bootstrapped estimates of the joint distribution of mean cost difference**

20  
21 618 **against mean QALY difference up to 3-years post randomisation**

22  
23 619

24  
25 620 **Figure 5 Estimated probability of being cost-effective compared with angiography**

26  
27 621 **alone against the amount (£) a health provider is willing to pay for one additional**

28  
29 622 **QALY**

30  
31 623

32  
33 624

34  
35 625

36  
37 626

38  
39 627

40  
41  
42  
43  
44  
45  
46  
47  
48  
49  
50  
51  
52  
53  
54  
55  
56  
57  
58  
59  
60

628 **References**

629

- 630 1. NICE. Myocardial perfusion scintigraphy for the diagnosis and management of  
631 angina and myocardial infarction: National Institute for Clinical Excellence 2003; Technology  
632 Appraisal Guidance 73.
- 633 2. Boden WE. Surgery, angioplasty, or medical therapy for symptomatic multivessel  
634 coronary artery disease: is there an indisputable "winning strategy" from evidence-based  
635 clinical trials? *Journal of the American College of Cardiology*. 2004;43(10):1752-4. Epub  
636 2004/05/18.
- 637 3. Coronary artery surgery study (CASS): a randomized trial of coronary artery bypass  
638 surgery. Quality of life in patients randomly assigned to treatment groups. *Circulation*.  
639 1983;68(5):951-60. Epub 1983/11/01.
- 640 4. Boden WE, O'Rourke RA, Teo KK, Hartigan PM, Maron DJ, Kostuk WJ, et al.  
641 Optimal medical therapy with or without PCI for stable coronary disease. *The New England*  
642 *journal of medicine*. 2007;356(15):1503-16. Epub 2007/03/28.
- 643 5. Patel MR, Peterson ED, Dai D, Brennan JM, Redberg RF, Anderson HV, et al. Low  
644 diagnostic yield of elective coronary angiography. *The New England journal of medicine*.  
645 2010;362(10):886-95. Epub 2010/03/12.
- 646 6. Gibbons RJ, Balady GJ, Bricker JT, Chaitman BR, Fletcher GF, Froelicher VF, et al.  
647 ACC/AHA 2002 guideline update for exercise testing: summary article. A report of the  
648 American College of Cardiology/American Heart Association Task Force on Practice  
649 Guidelines (Committee to Update the 1997 Exercise Testing Guidelines). *Journal of the*  
650 *American College of Cardiology*. 2002;40(8):1531-40. Epub 2002/10/24.
- 651 7. Douglas PS, Khandheria B, Stainback RF, Weissman NJ, Peterson ED, Hendel RC,  
652 et al. ACCF/ASE/ACEP/AHA/ASNC/SCAI/SCCT/SCMR 2008 appropriateness criteria for  
653 stress echocardiography: a report of the American College of Cardiology Foundation  
654 Appropriateness Criteria Task Force, American Society of Echocardiography, American  
655 College of Emergency Physicians, American Heart Association, American Society of Nuclear  
656 Cardiology, Society for Cardiovascular Angiography and Interventions, Society of  
657 Cardiovascular Computed Tomography, and Society for Cardiovascular Magnetic  
658 Resonance endorsed by the Heart Rhythm Society and the Society of Critical Care  
659 Medicine. *Journal of the American College of Cardiology*. 2008;51(11):1127-47. Epub  
660 2008/03/18.
- 661 8. Hendel RC, Berman DS, Di Carli MF, Heidenreich PA, Henkin RE, Pellikka PA, et al.  
662 ACCF/ASNC/ACR/AHA/ASE/SCCT/SCMR/SNM 2009 Appropriate Use Criteria for Cardiac  
663 Radionuclide Imaging: A Report of the American College of Cardiology Foundation  
664 Appropriate Use Criteria Task Force, the American Society of Nuclear Cardiology, the  
665 American College of Radiology, the American Heart Association, the American Society of  
666 Echocardiography, the Society of Cardiovascular Computed Tomography, the Society for  
667 Cardiovascular Magnetic Resonance, and the Society of Nuclear Medicine. *Journal of the*  
668 *American College of Cardiology*. 2009;53(23):2201-29. Epub 2009/06/06.
- 669 9. Hundley WG, Bluemke DA, Finn JP, Flamm SD, Fogel MA, Friedrich MG, et al.  
670 ACCF/ACR/AHA/NASCI/SCMR 2010 expert consensus document on cardiovascular

- 1  
2  
3 671 magnetic resonance: a report of the American College of Cardiology Foundation Task Force  
4 672 on Expert Consensus Documents. *Circulation*. 2010;121(22):2462-508. Epub 2010/05/19.  
5  
6 673 10. Sharples L, Hughes V, Crean A, Dyer M, Buxton M, Goldsmith K, et al. Cost-  
7 674 effectiveness of functional cardiac testing in the diagnosis and management of coronary  
8 675 artery disease: a randomised controlled trial. The CECaT trial. *Health Technol Assess*.  
9 676 2007;11(49):iii-iv, ix-115. Epub 2007/11/21.  
10  
11 677 11. Pryor DB, Shaw L, McCants CB, Lee KL, Mark DB, Harrell FE, Jr., et al. Value of the  
12 678 history and physical in identifying patients at increased risk for coronary artery disease.  
13 679 *Annals of internal medicine*. 1993;118(2):81-90. Epub 1993/01/15.  
14  
15 680 12. Seldinger SI. Catheter replacement of the needle in percutaneous arteriography; a  
16 681 new technique. *Acta radiologica*. 1953;39(5):368-76. Epub 1953/05/01.  
17  
18 682 13. Scanlon PJ, Faxon DP, Audet AM, Carabello B, Dehmer GJ, Eagle KA, et al.  
19 683 ACC/AHA guidelines for coronary angiography. A report of the American College of  
20 684 Cardiology/American Heart Association Task Force on practice guidelines (Committee on  
21 685 Coronary Angiography). Developed in collaboration with the Society for Cardiac  
22 686 Angiography and Interventions. *Journal of the American College of Cardiology*.  
23 687 1999;33(6):1756-824. Epub 1999/05/20.  
24  
25 688 14. Wackers FJ. Exercise myocardial perfusion imaging. *Journal of nuclear medicine* :  
26 689 official publication, Society of Nuclear Medicine. 1994;35(4):726-9. Epub 1994/04/01.  
27  
28 690 15. Pennell DJ, Sechtem UP, Higgins CB, Manning WJ, Pohost GM, Rademakers FE, et  
29 691 al. Clinical indications for cardiovascular magnetic resonance (CMR): Consensus Panel  
30 692 report. *Journal of cardiovascular magnetic resonance* : official journal of the Society for  
31 693 Cardiovascular Magnetic Resonance. 2004;6(4):727-65. Epub 2005/01/14.  
32  
33 694 16. Reeder SB, Atalar E, Faranesh AZ, McVeigh ER. Multi-echo segmented k-space  
34 695 imaging: an optimized hybrid sequence for ultrafast cardiac imaging. *Magnetic resonance in*  
35 696 *medicine* : official journal of the Society of Magnetic Resonance in Medicine / Society of  
36 697 Magnetic Resonance in Medicine. 1999;41(2):375-85. Epub 1999/03/18.  
37  
38 698 17. Canet EP, Janier MF, Revel D. Magnetic resonance perfusion imaging in ischemic  
39 699 heart disease. *Journal of magnetic resonance imaging* : JMRI. 1999;10(3):423-33. Epub  
40 700 1999/10/03.  
41  
42 701 18. Kind P. The EuroQol instrument: an index of health-related quality of life. In: Spiker  
43 702 B, editor. *Quality of life and pharmacoeconomics in clinical trials*. Philadelphia, PA:  
44 703 Lippincott-Raven; 1996.  
45  
46 704 19. Dolan P GC, Kind P. A social tariff for EuroQol: results from a UK general population  
47 705 survey 1995.  
48  
49 706 20. Willan AR, Lin DY, Cook RJ, Chen EB. Using inverse-weighting in cost-effectiveness  
50 707 analysis with censored data. *Statistical methods in medical research*. 2002;11(6):539-51.  
51 708 Epub 2003/01/09.  
52  
53 709 21. Efron B TR. *An introduction to the bootstrap*. San Francisco: Chapman and Hall;  
54 710 1993.  
55  
56  
57  
58  
59  
60



- 1  
2  
3 711 22. Tonino PA, Fearon WF, De Bruyne B, Oldroyd KG, Leesar MA, Ver Lee PN, et al.  
4 712 Angiographic versus functional severity of coronary artery stenoses in the FAME study  
5 713 fractional flow reserve versus angiography in multivessel evaluation. *Journal of the American*  
6 714 *College of Cardiology*. 2010;55(25):2816-21. Epub 2010/06/29.
- 7  
8 715 23. Mozes B, Shabtai E. The appropriateness of performing coronary angiography in two  
9 716 major teaching hospitals in Israel. *International journal for quality in health care : journal of*  
10 717 *the International Society for Quality in Health Care / ISQua*. 1994;6(3):245-9. Epub  
11 718 1994/09/01.
- 12  
13 719 24. Gray D, Hampton JR. Methods of establishing criteria for purchasing coronary  
14 720 angiography in the investigation of chest pain. *Journal of public health medicine*.  
15 721 1994;16(4):399-405. Epub 1994/12/01.
- 16  
17 722 25. Guadagnoli E, Hauptman PJ, Ayanian JZ, Pashos CL, McNeil BJ, Cleary PD.  
18 723 Variation in the use of cardiac procedures after acute myocardial infarction. *The New*  
19 724 *England journal of medicine*. 1995;333(9):573-8. Epub 1995/08/31.
- 20  
21 725 26. Mark DB, Naylor CD, Hlatky MA, Califf RM, Topol EJ, Granger CB, et al. Use of  
22 726 medical resources and quality of life after acute myocardial infarction in Canada and the  
23 727 United States. *The New England journal of medicine*. 1994;331(17):1130-5. Epub  
24 728 1994/10/27.
- 25  
26 729 27. Rouleau JL, Moye LA, Pfeffer MA, Arnold JM, Bernstein V, Cuddy TE, et al. A  
27 730 comparison of management patterns after acute myocardial infarction in Canada and the  
28 731 United States. *The SAVE investigators. The New England journal of medicine*.  
29 732 1993;328(11):779-84. Epub 1993/03/18.
- 30  
31 733 28. Tu JV, Pashos CL, Naylor CD, Chen E, Normand SL, Newhouse JP, et al. Use of  
32 734 cardiac procedures and outcomes in elderly patients with myocardial infarction in the United  
33 735 States and Canada. *The New England journal of medicine*. 1997;336(21):1500-5. Epub  
34 736 1997/05/22.
- 35  
36 737 29. Selby JV, Fireman BH, Lundstrom RJ, Swain BE, Truman AF, Wong CC, et al.  
37 738 Variation among hospitals in coronary-angiography practices and outcomes after myocardial  
38 739 infarction in a large health maintenance organization. *The New England journal of medicine*.  
39 740 1996;335(25):1888-96. Epub 1996/12/19.
- 40  
41 741 30. Chan PS, Patel MR, Klein LW, Krone RJ, Dehmer GJ, Kennedy K, et al.  
42 742 Appropriateness of percutaneous coronary intervention. *JAMA : the journal of the American*  
43 743 *Medical Association*. 2011;306(1):53-61. Epub 2011/07/07.
- 44  
45 744 31. Pijls NH, Fearon WF, Tonino PA, Siebert U, Ikeno F, Bornschein B, et al. Fractional  
46 745 flow reserve versus angiography for guiding percutaneous coronary intervention in patients  
47 746 with multivessel coronary artery disease: 2-year follow-up of the FAME (Fractional Flow  
48 747 Reserve Versus Angiography for Multivessel Evaluation) study. *Journal of the American*  
49 748 *College of Cardiology*. 2010;56(3):177-84. Epub 2010/06/12.
- 50  
51 749 32. Griffin SC, Barber JA, Manca A, Sculpher MJ, Thompson SG, Buxton MJ, et al. Cost  
52 750 effectiveness of clinically appropriate decisions on alternative treatments for angina pectoris:  
53 751 prospective observational study. *BMJ*. 2007;334(7594):624. Epub 2007/03/07.
- 54  
55  
56  
57  
58  
59  
60

- 1  
2  
3 752 33. Watkins S, McGeoch R, Lyne J, Steedman T, Good R, McLaughlin MJ, et al.  
4 753 Validation of magnetic resonance myocardial perfusion imaging with fractional flow reserve  
5 754 for the detection of significant coronary heart disease. *Circulation*. 2009;120(22):2207-13.  
6 755 Epub 2009/11/18.
- 7  
8 756 34. Krittayaphong R, Chaithiraphan V, Maneesai A, Udompanturak S. Prognostic value  
9 757 of combined magnetic resonance myocardial perfusion imaging and late gadolinium  
10 758 enhancement. *The international journal of cardiovascular imaging*. 2011;27(5):705-14. Epub  
11 759 2011/04/12.
- 12  
13 760 35. Bingham SE, Hachamovitch R. Incremental prognostic significance of combined  
14 761 cardiac magnetic resonance imaging, adenosine stress perfusion, delayed enhancement,  
15 762 and left ventricular function over preimaging information for the prediction of adverse events.  
16 763 *Circulation*. 2011;123(14):1509-18. Epub 2011/03/30.
- 17  
18 764 36. Greenwood JP, Maredia N, Younger JF, Brown JM, Nixon J, Everett CC, et al.  
19 765 Cardiovascular magnetic resonance and single-photon emission computed tomography for  
20 766 diagnosis of coronary heart disease (CE-MARC): a prospective trial. *Lancet*.  
21 767 2012;379(9814):453-60. Epub 2011/12/27.
- 22  
23 768 37. Greenwood JP. CMR versus SPECT for diagnosis of coronary heart disease –  
24 769 Authors' reply *The Lancet*. 2012;379(9832):2147 - 8.
- 25  
26  
27 770 38. Beanlands RS, Nichol G, Huszti E, Humen D, Racine N, Freeman M, et al. F-18-  
28 771 fluorodeoxyglucose positron emission tomography imaging-assisted management of patients  
29 772 with severe left ventricular dysfunction and suspected coronary disease: a randomized,  
30 773 controlled trial (PARR-2). *Journal of the American College of Cardiology*. 2007;50(20):2002-  
31 774 12. Epub 2007/11/13.
- 32  
33 775 39. Maron DJ, Stone GW, Berman DS, Mancini GB, Scott TA, Byrne DW, et al. Is cardiac  
34 776 catheterization necessary before initial management of patients with stable ischemic heart  
35 777 disease? Results from a Web-based survey of cardiologists. *American heart journal*.  
36 778 2011;162(6):1034-43 e13. Epub 2011/12/06.
- 37  
38 779 40. Nallamotheu BK, Rogers MA, Chernew ME, Krumholz HM, Eagle KA, Birkmeyer JD.  
39 780 Opening of specialty cardiac hospitals and use of coronary revascularization in medicare  
40 781 beneficiaries. *JAMA : the journal of the American Medical Association*. 2007;297(9):962-8.  
41 782 Epub 2007/03/08.
- 42  
43 783 41. Feit F, Mueller HS, Braunwald E, Ross R, Hodges M, Herman MV, et al.  
44 784 Thrombolysis in Myocardial Infarction (TIMI) phase II trial: outcome comparison of a  
45 785 "conservative strategy" in community versus tertiary hospitals. The TIMI Research Group.  
46 786 *Journal of the American College of Cardiology*. 1990;16(7):1529-34. Epub 1990/12/01.
- 47  
48  
49 787 42. Blustein J. High-technology cardiac procedures. The impact of service availability on  
50 788 service use in New York State. *JAMA : the journal of the American Medical Association*.  
51 789 1993;270(3):344-9. Epub 1993/07/21.
- 52  
53 790 43. Every NR, Larson EB, Litwin PE, Maynard C, Fihn SD, Eisenberg MS, et al. The  
54 791 association between on-site cardiac catheterization facilities and the use of coronary  
55 792 angiography after acute myocardial infarction. Myocardial Infarction Triage and Intervention  
56 793 Project Investigators. *The New England journal of medicine*. 1993;329(8):546-51. Epub  
57 794 1993/08/19.
- 58  
59  
60

- 1  
2  
3 795 44. Shaw LJ, Hachamovitch R, Berman DS, Marwick TH, Lauer MS, Heller GV, et al.  
4 796 The economic consequences of available diagnostic and prognostic strategies for the  
5 797 evaluation of stable angina patients: an observational assessment of the value of  
6 798 precatheterization ischemia. Economics of Noninvasive Diagnosis (END) Multicenter Study  
7 799 Group. *Journal of the American College of Cardiology*. 1999;33(3):661-9. Epub 1999/03/18.  
8  
9 800 45. Mowatt G, Vale L, Brazzelli M, Hernandez R, Murray A, Scott N, et al. Systematic  
10 801 review of the effectiveness and cost-effectiveness, and economic evaluation, of myocardial  
11 802 perfusion scintigraphy for the diagnosis and management of angina and myocardial  
12 803 infarction. *Health Technol Assess*. 2004;8(30):iii-iv, 1-207. Epub 2004/07/14.  
13  
14 804 46. Underwood SR, Godman B, Salyani S, Ogle JR, Ell PJ. Economics of myocardial  
15 805 perfusion imaging in Europe--the EMPIRE Study. *European heart journal*. 1999;20(2):157-  
16 806 66. Epub 1999/04/01.  
17  
18 807 47. Underwood SR, Shaw LJ, Anagnostopoulos C, Cerqueira M, Ell PJ, Flint J, et al.  
19 808 Myocardial perfusion scintigraphy and cost effectiveness of diagnosis and management of  
20 809 coronary heart disease. *Heart*. 2004;90 Suppl 5:v34-6. Epub 2004/07/16.  
21  
22 810 48. Uchida T, Popma J, Stone GW, Ellis SG, Turco MA, Ormiston JA, et al. The clinical  
23 811 impact of routine angiographic follow-up in randomized trials of drug-eluting stents: a critical  
24 812 assessment of "oculostenotic" reintervention in patients with intermediate lesions. *JACC*  
25 813 *Cardiovascular interventions*. 2010;3(4):403-11. Epub 2010/04/20.  
26  
27 814 49. Christou MA, Siontis GC, Katritsis DG, Ioannidis JP. Meta-analysis of fractional flow  
28 815 reserve versus quantitative coronary angiography and noninvasive imaging for evaluation of  
29 816 myocardial ischemia. *The American journal of cardiology*. 2007;99(4):450-6. Epub  
30 817 2007/02/13.  
31  
32 818 50. Gould KL. Does coronary flow trump coronary anatomy? *JACC Cardiovascular*  
33 819 *imaging*. 2009;2(8):1009-23. Epub 2009/08/15.  
34  
35 820 51. Chang SM, Nabi F, Xu J, Raza U, Mahmarian JJ. Normal stress-only versus  
36 821 standard stress/rest myocardial perfusion imaging: similar patient mortality with reduced  
37 822 radiation exposure. *Journal of the American College of Cardiology*. 2010;55(3):221-30. Epub  
38 823 2009/11/17.  
39  
40 824 52. Boldt J, Leber AW, Bonaventura K, Sohns C, Stula M, Huppertz A, et al. Cost-  
41 825 effectiveness of cardiovascular magnetic resonance and single-photon emission computed  
42 826 tomography for diagnosis of coronary artery disease in Germany. *Journal of cardiovascular*  
43 827 *magnetic resonance : official journal of the Society for Cardiovascular Magnetic Resonance*.  
44 828 2013;15:30. Epub 2013/04/12.  
45  
46 829 53. Walker S, Girardin F, McKenna C, Ball SG, Nixon J, Plein S, et al. Cost-effectiveness  
47 830 of cardiovascular magnetic resonance in the diagnosis of coronary heart disease: an  
48 831 economic evaluation using data from the CE-MARC study. *Heart*. 2013;99(12):873-81. Epub  
49 832 2013/04/18.  
50  
51 833 54. Kuntz KM, Fleischmann KE, Hunink MG, Douglas PS. Cost-effectiveness of  
52 834 diagnostic strategies for patients with chest pain. *Annals of internal medicine*.  
53 835 1999;130(9):709-18. Epub 1999/06/05.  
54  
55  
56  
57  
58  
59  
60

- 1  
2  
3 836 55. Hayashino Y, Nagata-Kobayashi S, Morimoto T, Maeda K, Shimbo T, Fukui T. Cost-  
4 837 effectiveness of screening for coronary artery disease in asymptomatic patients with Type 2  
5 838 diabetes and additional atherogenic risk factors. *Journal of general internal medicine*.  
6 839 2004;19(12):1181-91. Epub 2004/12/22.  
7  
8 840 56. Tan SS, Oppe M, Zoet-Nugteren SK, Niezen RA, Kofflard MJ, Ten Cate FJ, et al. A  
9 841 microcosting study of diagnostic tests for the detection of coronary artery disease in The  
10 842 Netherlands. *European journal of radiology*. 2009;72(1):98-103. Epub 2008/08/16.  
11  
12 843 57. Kim C, Kwok YS, Saha S, Redberg RF. Diagnosis of suspected coronary artery  
13 844 disease in women: a cost-effectiveness analysis. *American heart journal*. 1999;137(6):1019-  
14 845 27. Epub 1999/05/29.  
15  
16 846 58. Lewandowski M, Szwed H, Kowalik I. Searching for the optimal strategy for the  
17 847 diagnosis of stable coronary artery disease. Cost-effectiveness of the new algorithm.  
18 848 *Cardiology journal*. 2007;14(6):544-51. Epub 2008/07/25.  
19  
20 849  
21  
22  
23  
24 850  
25 851  
26  
27  
28  
29  
30  
31  
32  
33  
34  
35  
36  
37  
38  
39  
40  
41  
42  
43  
44  
45  
46  
47  
48  
49  
50  
51  
52  
53  
54  
55  
56  
57  
58  
59  
60

Figure 1 Trial summary

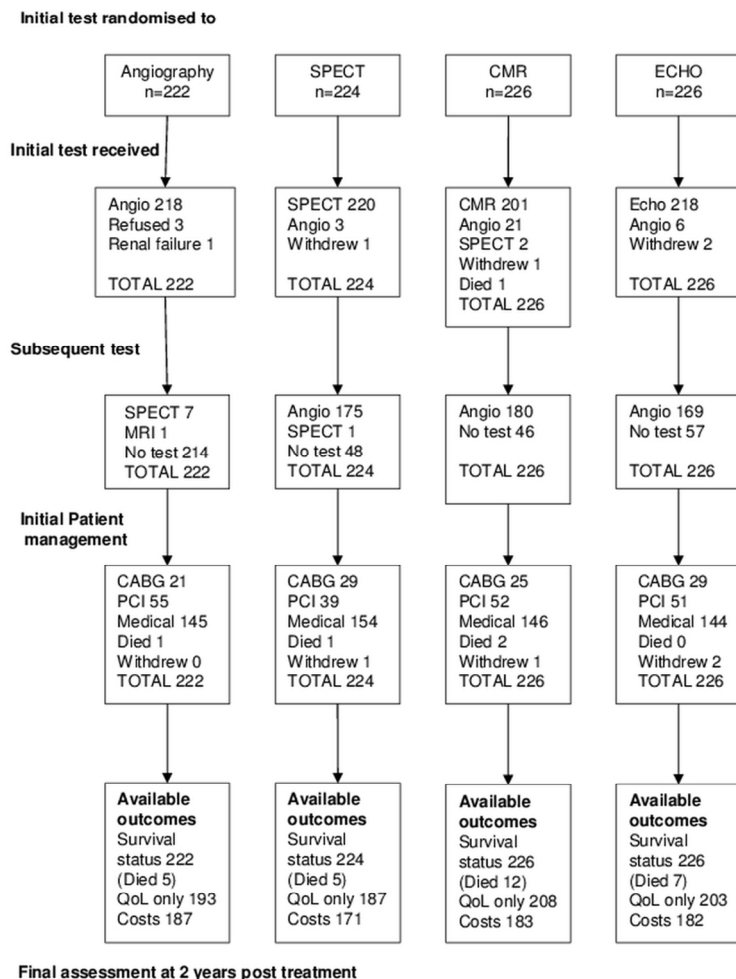

90x119mm (300 x 300 DPI)

1  
2  
3  
4  
5  
6  
7  
8  
9  
10  
11  
12  
13  
14  
15  
16  
17  
18  
19  
20  
21  
22  
23  
24  
25  
26  
27  
28  
29  
30  
31  
32  
33  
34  
35  
36  
37  
38  
39  
40  
41  
42  
43  
44  
45  
46  
47  
48  
49  
50  
51  
52  
53  
54  
55  
56  
57  
58  
59  
60

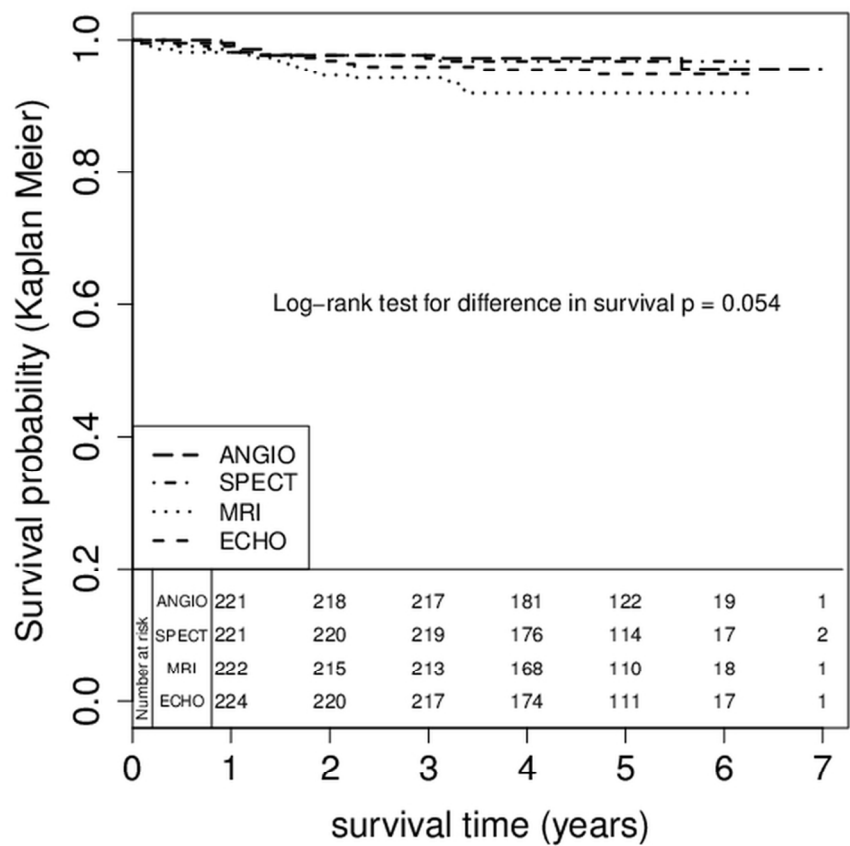

90x90mm (300 x 300 DPI)

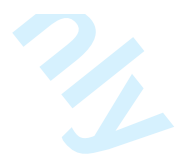

1  
2  
3  
4  
5  
6  
7  
8  
9  
10  
11  
12  
13  
14  
15  
16  
17  
18  
19  
20  
21  
22  
23  
24  
25  
26  
27  
28  
29  
30  
31  
32  
33  
34  
35  
36  
37  
38  
39  
40  
41  
42  
43  
44  
45  
46  
47  
48  
49  
50  
51  
52  
53  
54  
55  
56  
57  
58  
59  
60

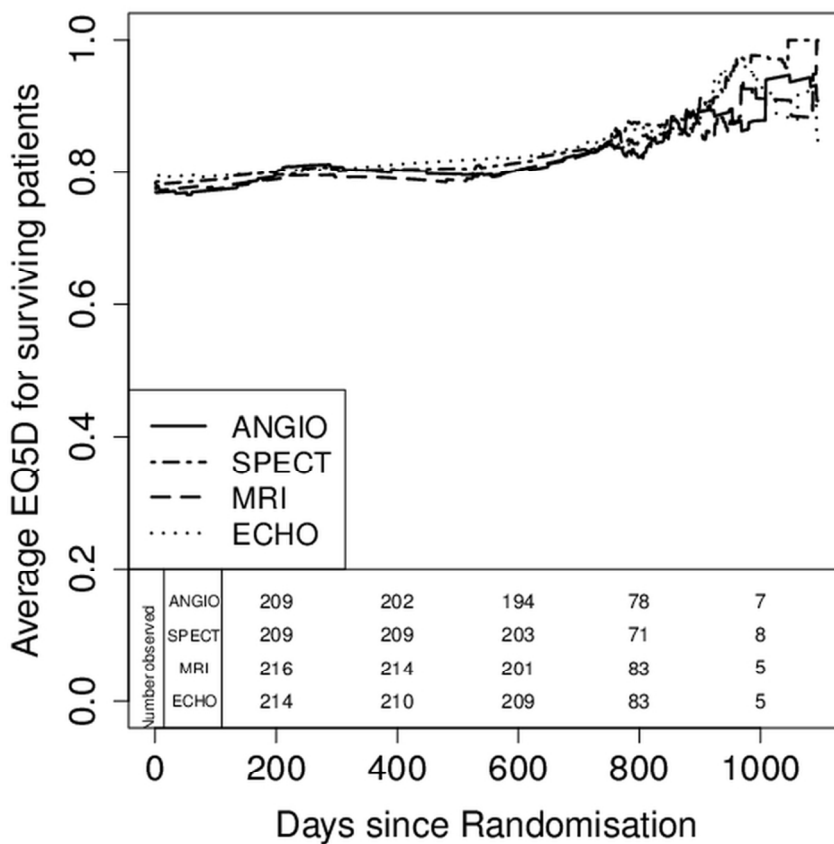

90x90mm (300 x 300 DPI)



1  
2  
3  
4  
5  
6  
7  
8  
9  
10  
11  
12  
13  
14  
15  
16  
17  
18  
19  
20  
21  
22  
23  
24  
25  
26  
27  
28  
29  
30  
31  
32  
33  
34  
35  
36  
37  
38  
39  
40  
41  
42  
43  
44  
45  
46  
47  
48  
49  
50  
51  
52  
53  
54  
55  
56  
57  
58  
59  
60

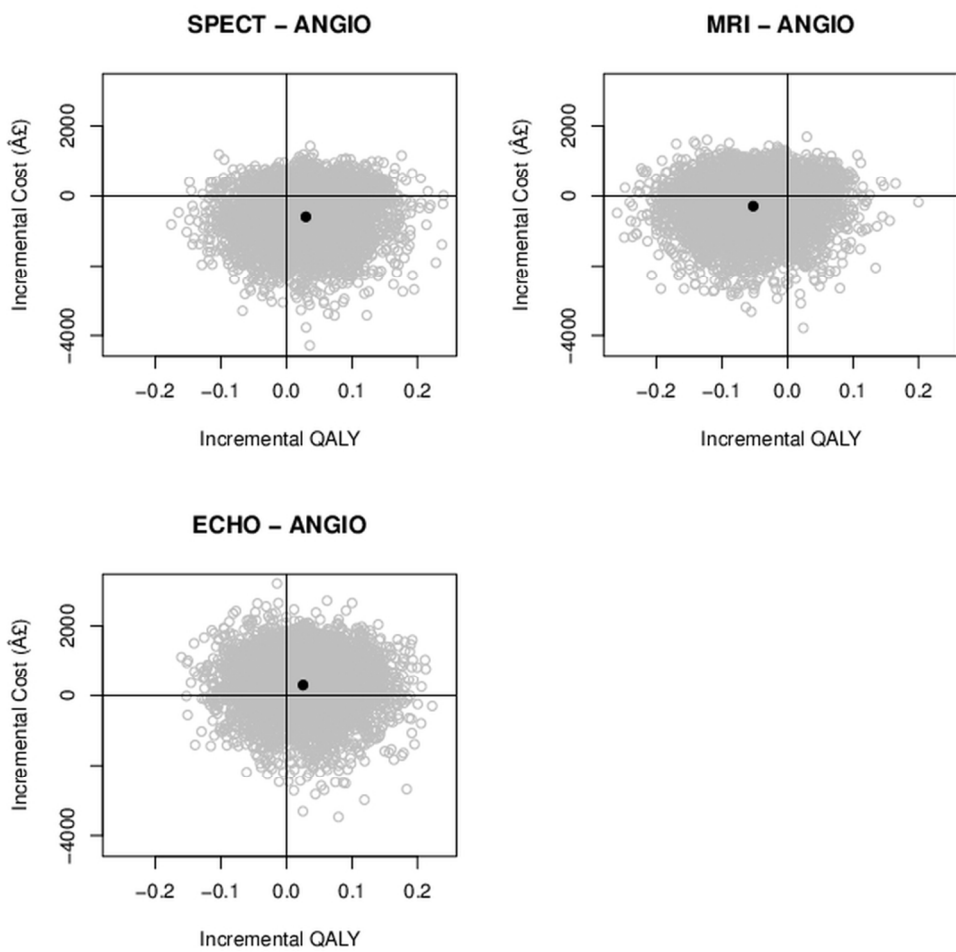

90x90mm (300 x 300 DPI)





1  
2  
3  
4  
5  
6  
7  
8  
9  
10  
11  
12  
13  
14  
15  
16  
17  
18  
19  
20  
21  
22  
23  
24  
25  
26  
27  
28  
29  
30  
31  
32  
33  
34  
35  
36  
37  
38  
39  
40  
41  
42  
43  
44  
45  
46  
47  
48  
49  
50  
51  
52  
53  
54  
55  
56  
57  
58  
59  
60

### Cost effectiveness acceptability curves

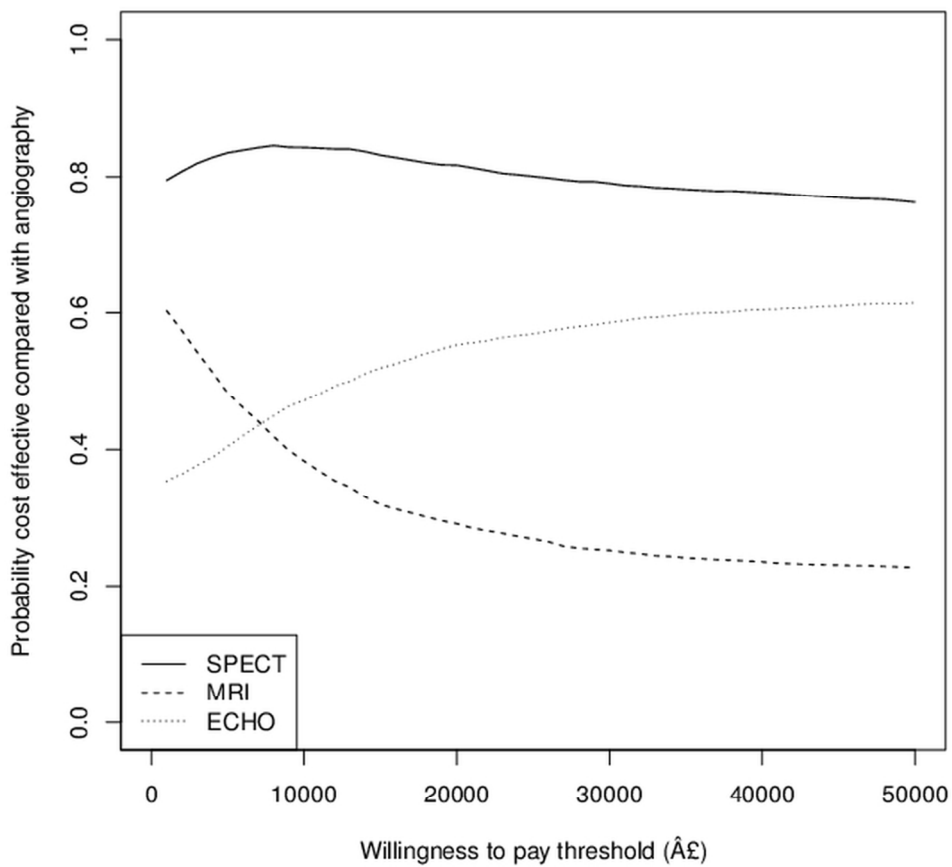

90x90mm (300 x 300 DPI)



## CONSORT checklist CECaT Trial BMJ Open Re-Submission

| Item               | Description                                                                                                 | Reported on line number |
|--------------------|-------------------------------------------------------------------------------------------------------------|-------------------------|
| Title              | Identification of the study as randomized                                                                   | 4                       |
| Authors *          | Contact details for the corresponding author                                                                | 26                      |
| Trial design       | Description of the trial design (e.g. parallel, cluster, non-inferiority)                                   | 140                     |
| Methods            |                                                                                                             |                         |
| Participants       | Eligibility criteria for participants and the settings where the data were collected                        | 153-157                 |
| Interventions      | Interventions intended for each group                                                                       | 140-144 & 163-165       |
| Objective          | Specific objective or hypothesis                                                                            | 147                     |
| Outcome            | Clearly defined primary outcome for this report                                                             | 219                     |
| Randomization      | How participants were allocated to interventions                                                            | 159                     |
| Blinding (masking) | Whether or not participants, care givers, and those assessing the outcomes were blinded to group assignment | 140                     |
| Results            |                                                                                                             |                         |
| Numbers randomized | Number of participants randomized to each group                                                             | 285 & 582               |
| Recruitment        | Trial status                                                                                                |                         |
| Numbers analysed   | Number of participants analysed in each group                                                               | 582                     |
| Outcome            | For the primary outcome, a result for each group and the estimated effect size and its precision            | 585                     |
| Harms              | Important adverse events or side effects                                                                    | 318-9                   |
| Conclusions        | General interpretation of the results                                                                       | 540                     |
| Trial registration | Registration number and name of trial register                                                              | 124                     |
| Funding            | Source of funding                                                                                           | 546-548                 |
